# Supplementary material for: Semantic biomedical resource discovery: a Natural Language Processing framework
Source: PubMed Central journal article supplement (PMC4591066; doi:10.1186/s12911-015-0200-4), 2015-09-30
Supplement: 12911_2015_200_MOESM1_ESM.pdf [file 12911_2015_200_MOESM1_ESM.pdf]

Table 1: The descriptions of the tools that could solve entirely the first clinical question.

| <b>SCORE</b> | <b>Tool Name</b>                            | <b>Tool URL</b>                                                          | <b>Tool Description</b>                                                                                                                                                                                                                                                                                                                                                                                                                                                                                                                                                                                                                                                                                            | <b>Input</b>                              | <b>Output</b>                                                                                                                             |
|--------------|---------------------------------------------|--------------------------------------------------------------------------|--------------------------------------------------------------------------------------------------------------------------------------------------------------------------------------------------------------------------------------------------------------------------------------------------------------------------------------------------------------------------------------------------------------------------------------------------------------------------------------------------------------------------------------------------------------------------------------------------------------------------------------------------------------------------------------------------------------------|-------------------------------------------|-------------------------------------------------------------------------------------------------------------------------------------------|
| 4            | cBio Cancer Genomics Data Server (CGDS) API | http://www.proteomexchange.com/api/cbio-cancer-genomics-data-server-cgds | The service provides direct access by applications to genetic and genomic data stored by the Memorial Sloan-Kettering Cancer Center. Applications can retrieve information about cancer studies and their genetic findings, genetic profiles and indicators for specific cancer types and gene structures, and similar highly detailed data. Datasets document more than 5000 tumor samples from 20 research studies. API methods support retrieval of cancer research studies, with detailed filtering by specific topics and findings. Methods also allow retrieval of genetic profiles and case lists reported in cancer research, extended mutation data, protein and antibody information, and clinical data. | genetic data, genomic data, cancer, tumor | cancer, genetic finding, genetic profile, gene structure, mutation data, protein, antibody information, clinical data, Tab-delimited text |

|   |                                    |                                                                  |                                                                                                                                                                                                                                                                                                                                                                                                                                                                                                                                                                                                                                                                                                                                                                                                                                       |                          |                                                              |
|---|------------------------------------|------------------------------------------------------------------|---------------------------------------------------------------------------------------------------------------------------------------------------------------------------------------------------------------------------------------------------------------------------------------------------------------------------------------------------------------------------------------------------------------------------------------------------------------------------------------------------------------------------------------------------------------------------------------------------------------------------------------------------------------------------------------------------------------------------------------------------------------------------------------------------------------------------------------|--------------------------|--------------------------------------------------------------|
| 4 | National Cancer Institute SEER API | http://www.programmatical.com/api/national-cancer-institute-seer | <p>The Surveillance, Epidemiology and End Results (SEER) Program, a service of the National Cancer Institute, is a cancer statistics resource. Collected data includes information on the incidence, prevalence and survival from specific geographic areas within the U.S., as well as cancer mortality for the entire country. The SEER API is a RESTful service supporting various program datasets and algorithms, and is available to developers who wish to incorporate SEER resources into their own systems. Exposed resources include Collaborative Staging, the Hematopoietic and Lymphoid Neoplasm Database, NAACCR documentation, the Antineoplastic Drugs Database, and incidence site recode variables. The API returns JSON formatted responses, communicates over HTTPS, and requires a free account and API key.</p> | cancer, cancer mortality | antineoplastic drugs, hematopoietic, lymphoid neoplasm, JSON |
|---|------------------------------------|------------------------------------------------------------------|---------------------------------------------------------------------------------------------------------------------------------------------------------------------------------------------------------------------------------------------------------------------------------------------------------------------------------------------------------------------------------------------------------------------------------------------------------------------------------------------------------------------------------------------------------------------------------------------------------------------------------------------------------------------------------------------------------------------------------------------------------------------------------------------------------------------------------------|--------------------------|--------------------------------------------------------------|

|   |                                             |                                                |                                                                                                                                                                                                                                                                                                                                              |                                                                                  |                                          |
|---|---------------------------------------------|------------------------------------------------|----------------------------------------------------------------------------------------------------------------------------------------------------------------------------------------------------------------------------------------------------------------------------------------------------------------------------------------------|----------------------------------------------------------------------------------|------------------------------------------|
| 4 | <b>EUADR -<br/>Literatur<br/>e analysis</b> | http://www.myexperiment.org/workflows/280.html | The aim of the "Literature Analysis" workflow is to automate the search of publications related to ADRs corresponding to a given drug/adverse event association. To do so, we defined an approach based on the MeSH thesaurus, using the subheadings «chemically induced» and «adverse effects» with the “Pharmacological Action” knowledge. | Toxicology<br>Adverse effects<br>(topic_2840),<br>Drug identifier<br>(data_0993) | Literature and reference<br>(topic_3068) |
|---|---------------------------------------------|------------------------------------------------|----------------------------------------------------------------------------------------------------------------------------------------------------------------------------------------------------------------------------------------------------------------------------------------------------------------------------------------------|----------------------------------------------------------------------------------|------------------------------------------|

Table 2: The free text tools that were exported automatically by the framework for the first research question.

|                 |                                                                                                                                                                                              |
|-----------------|----------------------------------------------------------------------------------------------------------------------------------------------------------------------------------------------|
| Free Text Tools |                                                                                                                                                                                              |
| 158             | <ol style="list-style-type: none"> <li>1. Correlation service</li> <li>2. Drug Re-Purposing Workflow</li> <li>3. EUADR – Literature analysis</li> <li>4. Epidemic Marketplace API</li> </ol> |

5. ADR-S
6. MiMI/Metabolomics API
7. Sierra Stanford HIV API
8. GSNAP
9. cBio Cancer Genomics Data Server (CGDS) API
10. tspair
11. iASeq
12. FastA protein similarity search API
13. DGIdb API
14. Predictionet
15. SciBite API
16. From cDNA Microarray Raw Data to Pathways and Published Abstracts
17. VirusSeq
18. National Cancer Institute SEER API
19. SLAP API
20. geneRecommender
21. bioNMF API
22. China Cancer Database API
23. Download pathways for external references list
24. FusionMap
25. Tracknburn FoodData API
26. BSMAP
27. ViralFusionSeq
28. ObTiMA
29. Oncosimulator
30. ChEMBL API
31. National Library of Medicine ChemSpell API
32. SomatiCA
33. Download pathways for external references list (Taverna 2)
34. INOH Pathway Database API

35. Mirtarbase
36. BIOBASE API
37. National Drug File-Reference Terminology API
38. Drugle API
39. National Cancer Institute caDSR API
40. Get pathways by external reference
41. GBSeq test
42. MethylCoder
43. SSearch protein similarity search API
44. Snm
45. Copa
46. PcProf predict physico-chemical profiles of proteins API
47. DAVID Bioinformatics API
48. HIPAASpace API
49. DIAL
50. Vsn
51. Sizepower
52. Retrieve Pathways and Compound information from KEGG
53. MetMap
54. Perform a search through NCBI eUtils eSearch
55. Kegg pathway diagrams
56. BFAST
57. National Institute on Drug Abuse Drug Screening Tool API
58. Gviz
59. Protein search fetch align tree
60. BioCyc API
61. MuTect
62. Novocraft
63. MiRProf
64. CLCbio Genomics Workbench

65. GSVA
66. GeneCoDis2 API
67. ACME
68. EBI IntAct
69. JasparDB API
70. SOCS
71. VegaMC
72. VIOLIN API
73. SIMPA96 API
74. BioAID Discover proteins from text plus synonyms
75. H-InvDB API
76. Lexicomp API
77. Charm
78. maSigPro
79. FusionCatcher
80. Workflow for Protein Sequence Analysis
81. EpiGRAPH
82. RAWverna Image Evaluator - Evaluate relative
83. Bcbio-nextgen
84. Spiral Genetics
85. RxNorm Prescribable API
86. CIPF RENATO API
87. metaArray
88. get drugs by pathways
89. Biosemantics ACCCA API
90. coGPS
91. bgafun
92. MassArray
93. Genometa
94. arrayQualityMetrics

95. biomvRCNS
96. FragGeneScan
97. Cufflinks
98. Aetna CarePass API
99. Translate Nucleotide sequence into Peptide sequence
100. new drug test
101. GeneTalk
102. Genefu
103. ZINBA
104. DeFuse
105. GOR protein secondary structure prediction API
106. Lumi
107. Bis-SNP
108. MiRDeep
109. GenomicTools
110. Get Pathway-Genes and gene description by Entrez gene id
111. DailyMed API
112. Rdiff
113. Dexus
114. ERNE
115. ShortFuse
116. STEPStools API
117. CleaveLand
118. Olego
119. Sherman
120. Kegg DrugID
121. Methpipe
122. RMAP
123. Protein alignment transmembrane
124. COILS predict protein coiled-coil regions API

125. GeneCruiser API
126. SIM
127. OpenTox API
128. How are you API
129. HIV Drug Research Center API
130. FindPeaks 4.0 (Vancouver Short Read Package)
131. Image Mining with RapidMiner
132. SignalP/SignalP4 API
133. The Cancer Genome Atlas API
134. GenomeGraphs
135. NCBI Conserved Domain Database (CDD) API
136. myHealthAccount API
137. BioAID ProteinDiscovery filterOnHumanUniprot perDoc html
138. Pseudoviewer API
139. RxNorm API
140. Cigna Health API
141. biocGraph
142. Kissnp
143. ncRNA fRNAdb API
144. Biopieces
145. Bismark
146. miRNApath
147. Find pathways in which two genes co-occur (in WikiPathways)
148. Allen Brain Atlas API
149. AIDSinfo API
150. CNANorm
151. maDB
152. CancerMutationAnalysis
153. FastQ Screen
154. BRAT



|  |                                                                                                               |
|--|---------------------------------------------------------------------------------------------------------------|
|  | 155. MetNet API<br>156. BS Seeker<br>157. Pillbox API<br>158. HUMAN Microarray CEL file to candidate pathways |
|--|---------------------------------------------------------------------------------------------------------------|

Table 3: The descriptions of the tools that could solve entirely the second clinical question.

| SCORE | Tool Name     | Tool URL                                                                                                                                                                                              | Tool Description                                                                                                                                                                                                                                                                                                                                                                                                                                                                                                                                         | Input | Output |
|-------|---------------|-------------------------------------------------------------------------------------------------------------------------------------------------------------------------------------------------------|----------------------------------------------------------------------------------------------------------------------------------------------------------------------------------------------------------------------------------------------------------------------------------------------------------------------------------------------------------------------------------------------------------------------------------------------------------------------------------------------------------------------------------------------------------|-------|--------|
| 3     | miRNAp<br>ath | <a href="http://www.biocompare.com/2013/08/21/miRNApath-Pathway-Enrichment-for-miRNA-Expression-Data">http://www.biocompare.com/2013/08/21/miRNApath-Pathway-Enrichment-for-miRNA-Expression-Data</a> | miRNApath: Pathway Enrichment for miRNA Expression Data. This package provides pathway enrichment techniques for miRNA expression data. Specifically, the set of methods handles the many-to-many relationship between miRNAs and the multiple genes they are predicted to target (and thus affect.) It also handles the gene-to-pathway relationships separately. Both steps are designed to preserve the additive effects of miRNAs on genes, many miRNAs affecting one gene, one miRNA affecting multiple genes, or many miRNAs affecting many genes. |       |        |

|   |                |                                                                                                                                                                           |                                                                                                                                                                                                                                                                                                                                                                                                                                                                                                                                                                                                                                                                                                                                                                                                                                                                                                           |                       |                                           |
|---|----------------|---------------------------------------------------------------------------------------------------------------------------------------------------------------------------|-----------------------------------------------------------------------------------------------------------------------------------------------------------------------------------------------------------------------------------------------------------------------------------------------------------------------------------------------------------------------------------------------------------------------------------------------------------------------------------------------------------------------------------------------------------------------------------------------------------------------------------------------------------------------------------------------------------------------------------------------------------------------------------------------------------------------------------------------------------------------------------------------------------|-----------------------|-------------------------------------------|
|   |                | <a href="#">NApath.html</a>                                                                                                                                               |                                                                                                                                                                                                                                                                                                                                                                                                                                                                                                                                                                                                                                                                                                                                                                                                                                                                                                           |                       |                                           |
| 2 | <b>mirPath</b> | <a href="http://di.ana.imi.s.athena-innovation.gr/DianaTools/index.php?r=mirpath/index">http://di.ana.imi.s.athena-innovation.gr/DianaTools/index.php?r=mirpath/index</a> | <p>DIANA-miRPath is a miRNA pathway analysis web-server, providing accurate statistics, while being able to accommodate advanced pipelines. miRPath can utilize predicted miRNA targets (in CDS or 3'-UTR regions) provided by the DIANA-microT-CDS algorithm or even experimentally validated miRNA interactions derived from DIANA-TarBase v6.0. These interactions (predicted and/or validated) can be subsequently combined with sophisticated merging and meta-analysis algorithms. miRPath v2.0 can perform advanced analysis pipelines, such as hierarchical clustering of miRNAs and pathways based on the levels of their interactions. Furthermore, users can easily create heat maps of miRNAs vs pathways interactions. Other supported features include the identification of pathological single nucleotide polymorphisms (SNPs) in miRNA binding sites, as well as the "Reverse Search</p> | miRNA IDs (data_2642) | Pathway or network identifier (data_1082) |

|   |            |                                                                                     |                                                                                                                                                                                                                                                                                                                                                                                                                                                                                                                                                                                                       |                       |                     |
|---|------------|-------------------------------------------------------------------------------------|-------------------------------------------------------------------------------------------------------------------------------------------------------------------------------------------------------------------------------------------------------------------------------------------------------------------------------------------------------------------------------------------------------------------------------------------------------------------------------------------------------------------------------------------------------------------------------------------------------|-----------------------|---------------------|
|   |            |                                                                                     | module”, where the user can identify all the predicted or experimentally validated miRNAs significantly targeting a selected pathway.                                                                                                                                                                                                                                                                                                                                                                                                                                                                 |                       |                     |
| 3 | mirtarbase | <a href="http://mirtarbase.mbc.nctu.edu.tw/">http://mirtarbase.mbc.nctu.edu.tw/</a> | miRTarBase has accumulated more than fifty thousand miRNA-target interactions (MTIs), which are collected by manually surveying pertinent literature after data mining of the text systematically to filter research articles related to functional studies of miRNAs. Generally, the collected MTIs are validated experimentally by reporter assay, western blot, microarray and next-generation sequencing experiments. While containing the largest amount of validated MTIs, the miRTarBase provides the most updated collection by comparing with other similar, previously developed databases. | miRNA IDs (data_2642) | Gene ID (data_2295) |

Table 4: The free text tools that were exported automatically by the framework for the second clinical sentence.

| Free Text Tools |                                                                                                                                                                                                                                                                                                                                                                     |
|-----------------|---------------------------------------------------------------------------------------------------------------------------------------------------------------------------------------------------------------------------------------------------------------------------------------------------------------------------------------------------------------------|
| 231             | <ol style="list-style-type: none"> <li>1. Arabidopsis thaliana Microarray Analysis</li> <li>2. KEGG pathways common to both QTL and microarray based investigations</li> <li>3. MinePath</li> <li>4. HUMAN Microarray CEL file to candidate pathways</li> <li>5. From cDNA Microarray Raw Data to Pathways and Published Abstracts</li> <li>6. miRNApath</li> </ol> |

7. MitoMiner API
8. PathNet
9. ExpressionView
10. GSVA
11. Pathways and Gene annotations for QTL region
12. Macat
13. Betr
14. GPSeq
15. UnigeneID to KEGG Pathways
16. Dexus
17. adSplit
18. DEGseq
19. antiProfiles
20. NCBI Gi to Kegg Pathway Descriptions
21. Xps
22. BaySeq
23. Gene To Pathways (Vistrails)
24. GlobalAncova
25. maSigPro
26. Drug Re-Purposing Workflow
27. GeneProf API
28. microRNA to KEGG Pathways and Abstracts
29. Aarray
30. Identification of differential genes using the LIMMA Bioconductor package within R
31. Pipeline Pilot
32. Gage
33. Identification of differential genes using t-tests by R
34. Goseq
35. GenomeGraphs
36. MeV

37. DEDS
38. phenoTest
39. ADR-S
40. Rmagpie
41. Bgmix
42. Allen Brain Atlas API
43. maDB
44. Calculating frequencies of gene expression levels using microarray data in MaxD
45. GENE-Counter
46. ArrayStar
47. Kegg pathway diagrams
48. clusterProfiler
49. ERGO Genome Analysis and Discovery System
50. Ocplus
51. diffGeneAnalysis
52. SeqGSEA
53. Ssize
54. Lymphoma type prediction based on microarray data
55. Mfuzz
56. Myrna
57. metaArray
58. Entrez Gene to KEGG Pathway
59. SNAGEE
60. BBSeq
61. LMGene
62. caArray data retrieving
63. WebScipio API
64. Genefu
65. Lumi
66. Kegg DrugID

67. MiMI/Metabolomics API
68. BiologicalNetworks API
69. Import and convert gene list
70. Mouse Microarray Analysis
71. Ffpe
72. CancerMutationAnalysis
73. ReactomePA
74. PADOG
75. GeneCoDis2 API
76. Pathview
77. coGPS
78. AffyRNADegradation
79. BioDB Hyperlink Management System API
80. MiRProf
81. geneRecommender
82. Import and convert gene list
83. Find pathways in which two genes co-occur (in WikiPathways)
84. EnrichNet API
85. Retrieve Pathways and Compound information from KEGG
86. BioCyc API
87. Get Pathway-Genes and gene description by Entrez gene id
88. FusionHunter
89. Copa
90. mirPath
91. CIPF RENATO API
92. MmPalateMiRNA
93. DeconRNASeq
94. H-InvDB API
95. DSGseq
96. cBio Cancer Genomics Data Server (CGDS) API

97. GeneCruiser API
98. Biosemantics ACCCA API
99. DESeq
100. metabolic pathway.xml
101. SplicingGraphs
102. MMSEQ
103. EdgeR
104. Annmap
105. ALTER Reflective API
106. Match concept profiles with predefined set
107. ABBA
108. Genefilter
109. Mgsa
110. NOISeq
111. SeqSite
112. Puma
113. DGIdb API
114. Limma
115. GMOD API
116. goTools
117. piano
118. EDASeq
119. FragGeneScan
120. DAVID Bioinformatics API
121. Perform a search through NCBI eUtils eSearch
122. National Institute on Drug Abuse Drug Screening Tool API
123. Correlation service
124. G-Mo.R-Seq
125. test workbench demo '14
126. Get Gene Ids for Human

127. Gowinda
128. VegaMC
129. Associated Region to Gene List
130. SIMPA96 API
131. Liliopsida Protein Alignment
132. FusionCatcher
133. tRNAscan
134. SomatiCA
135. gene ontology diagram.xml
136. oneChannelGUI
137. AgiMicroRna
138. DeFuse
139. ALEXA-Seq
140. topGO
141. ASC
142. SiLoCo
143. MiRanalyzer
144. gene subset extract
145. Mapping OligoNucleotides to an assembly
146. Gene to Pubmed
147. Epigenome
148. bioNMF API
149. tspair
150. TopHat-Fusion
151. Kegg API
152. JasparDB API
153. MiRCat
154. Oncosimulator
155. Pathway Commons API
156. pathRender



157. How are you API
158. sigPathway
159. FastQ Screen
160. Promedas API
161. SLAP API
162. Ingenuity Variant Analysis
163. Retrieve a protein from the GPCRDB
164. Download pathways for external references list
165. get elements by pathway
166. Extract unique proteins from blast results
167. BSMAP
168. MapDamage
169. BIOBASE API
170. Drugle API
171. RmiR
172. VisANT API
173. Mapping microarray data onto metabolic pathways
174. Workflow for Protein Sequence Analysis
175. MiRDeep
176. GraphPAC
177. SSearch protein similarity search API
178. Breakpointer
179. E-miR
180. RxNorm Prescribable API
181. PALMA
182. FusionSeq
183. ObTiMA
184. PcProf predict physico-chemical profiles of proteins API
185. myHealthAccount API
186. ZINBA

187. AIDSinfo API
188. MirTools
189. STEPStools API
190. get drugs by pathways
191. ZORRO
192. SeqBuster
193. DIAL
194. Predictionet
195. maCorrPlot
196. ChimeraScan
197. Write pathway to disk
198. Chipster
199. Triplex
200. Batman
201. Methpipe
202. Bgafun
203. Get pathways by external reference
204. INOH Pathway Database API
205. Retrieve Protein Sequence
206. Bililite API
207. GenomicTools
208. Les
209. segmentSeq
210. cPath API
211. iPAC
212. HIPAASpace API
213. Mirtarbase
214. NPS
215. Simplify a BLAST text file
216. LVSmRNA

|  |                                                                                                                                                                                                                                                                                                                                                            |
|--|------------------------------------------------------------------------------------------------------------------------------------------------------------------------------------------------------------------------------------------------------------------------------------------------------------------------------------------------------------|
|  | 217. Pillbox API<br>218. lifeIMAGE API<br>219. MANOR<br>220. NucleR<br>221. Download pathways for external references list (Taverna 2)<br>222. Qseq<br>223. Fetch PDB flatfile from RCSB server<br>224. SequenceVariantAnalyzer<br>225. mBPCR<br>226. test30<br>227. MetNet API<br>228. EBI CENSOR<br>229. methyAnalysis<br>230. ChEMBL API<br>231. ExiMiR |
|--|------------------------------------------------------------------------------------------------------------------------------------------------------------------------------------------------------------------------------------------------------------------------------------------------------------------------------------------------------------|

Table 5: The specific semantic categories of named entities

| Abbreviation | URI                                                                                                                           | Semantic Category  |
|--------------|-------------------------------------------------------------------------------------------------------------------------------|--------------------|
| aggp         | <a href="http://linkedlifedata.com/resource/umls-semnetwork/T100">http://linkedlifedata.com/resource/umls-semnetwork/T100</a> | AGE                |
| amas         | <a href="http://linkedlifedata.com/resource/calbc-group/GENE">http://linkedlifedata.com/resource/calbc-group/GENE</a>         | MOLECULAR_SEQUENCE |
| bacs         | <a href="http://linkedlifedata.com/resource/calbc-group/GENE">http://linkedlifedata.com/resource/calbc-group/GENE</a>         | MOLECULAR_SEQUENCE |

|      |                                                                                                                               |                    |
|------|-------------------------------------------------------------------------------------------------------------------------------|--------------------|
| bact | <a href="http://linkedlifedata.com/resource/calbc-group/GENE">http://linkedlifedata.com/resource/calbc-group/GENE</a>         | MOLECULAR_SEQUENCE |
| biof | <a href="http://linkedlifedata.com/resource/calbc-group/GENE">http://linkedlifedata.com/resource/calbc-group/GENE</a>         | MOLECULAR_SEQUENCE |
| enzy | <a href="http://linkedlifedata.com/resource/calbc-group/GENE">http://linkedlifedata.com/resource/calbc-group/GENE</a>         | MOLECULAR_SEQUENCE |
| genf | <a href="http://linkedlifedata.com/resource/calbc-group/GENE">http://linkedlifedata.com/resource/calbc-group/GENE</a>         | MOLECULAR_SEQUENCE |
| mbrt | <a href="http://linkedlifedata.com/resource/calbc-group/GENE">http://linkedlifedata.com/resource/calbc-group/GENE</a>         | MOLECULAR_SEQUENCE |
| moft | <a href="http://linkedlifedata.com/resource/calbc-group/GENE">http://linkedlifedata.com/resource/calbc-group/GENE</a>         | MOLECULAR_SEQUENCE |
| mosq | <a href="http://linkedlifedata.com/resource/calbc-group/GENE">http://linkedlifedata.com/resource/calbc-group/GENE</a>         | MOLECULAR_SEQUENCE |
| bmod | <a href="http://linkedlifedata.com/resource/umls-semnetwork/T091">http://linkedlifedata.com/resource/umls-semnetwork/T091</a> | BIOMEDICAL         |
| bodm | <a href="http://linkedlifedata.com/resource/umls-semnetwork/T091">http://linkedlifedata.com/resource/umls-semnetwork/T091</a> | BIOMEDICAL         |
| anab | <a href="http://linkedlifedata.com/resource/calbc-group/ANAT">http://linkedlifedata.com/resource/calbc-group/ANAT</a>         | BODY_PART          |
| anst | <a href="http://linkedlifedata.com/resource/calbc-group/ANAT">http://linkedlifedata.com/resource/calbc-group/ANAT</a>         | BODY_PART          |
| bdsu | <a href="http://linkedlifedata.com/resource/calbc-group/ANAT">http://linkedlifedata.com/resource/calbc-group/ANAT</a>         | BODY_PART          |
| bdsy | <a href="http://linkedlifedata.com/resource/calbc-group/ANAT">http://linkedlifedata.com/resource/calbc-group/ANAT</a>         | BODY_PART          |
| blor | <a href="http://linkedlifedata.com/resource/calbc-group/ANAT">http://linkedlifedata.com/resource/calbc-group/ANAT</a>         | BODY_PART          |
| bpoc | <a href="http://linkedlifedata.com/resource/calbc-group/ANAT">http://linkedlifedata.com/resource/calbc-group/ANAT</a>         | BODY_PART          |

|      |                                                                                                                               |                     |
|------|-------------------------------------------------------------------------------------------------------------------------------|---------------------|
| bsoj | <a href="http://linkedlifedata.com/resource/calbc-group/ANAT">http://linkedlifedata.com/resource/calbc-group/ANAT</a>         | BODY_PART           |
| ortf | <a href="http://linkedlifedata.com/resource/calbc-group/ANAT">http://linkedlifedata.com/resource/calbc-group/ANAT</a>         | BODY_PART           |
| celc | <a href="http://linkedlifedata.com/resource/umls-semnetwork/T025">http://linkedlifedata.com/resource/umls-semnetwork/T025</a> | CELL                |
| celf | <a href="http://linkedlifedata.com/resource/umls-semnetwork/T025">http://linkedlifedata.com/resource/umls-semnetwork/T025</a> | CELL                |
| cell | <a href="http://linkedlifedata.com/resource/umls-semnetwork/T025">http://linkedlifedata.com/resource/umls-semnetwork/T025</a> | CELL                |
| comd | <a href="http://linkedlifedata.com/resource/umls-semnetwork/T025">http://linkedlifedata.com/resource/umls-semnetwork/T025</a> | CELL                |
| clna | <a href="http://linkedlifedata.com/resource/umls-semnetwork/T201">http://linkedlifedata.com/resource/umls-semnetwork/T201</a> | CLINICAL_ATTRIBUTE  |
| medd | <a href="http://linkedlifedata.com/resource/umls-semnetwork/T074">http://linkedlifedata.com/resource/umls-semnetwork/T074</a> | DEVICE              |
| diap | <a href="http://linkedlifedata.com/resource/umls-semnetwork/T060">http://linkedlifedata.com/resource/umls-semnetwork/T060</a> | DIAGNOSIS           |
| dsyn | <a href="http://linkedlifedata.com/resource/umls-semnetwork/T047">http://linkedlifedata.com/resource/umls-semnetwork/T047</a> | DISEASE             |
| clnd | <a href="http://linkedlifedata.com/resource/umls-semnetwork/T200">http://linkedlifedata.com/resource/umls-semnetwork/T200</a> | DRUG                |
| antb | <a href="http://linkedlifedata.com/resource/umls-semnetwork/T200">http://linkedlifedata.com/resource/umls-semnetwork/T200</a> | DRUG                |
| food | <a href="http://linkedlifedata.com/resource/umls-semnetwork/T168">http://linkedlifedata.com/resource/umls-semnetwork/T168</a> | FOOD                |
| gngm | <a href="http://linkedlifedata.com/resource/umls-semnetwork/T028">http://linkedlifedata.com/resource/umls-semnetwork/T028</a> | GENE                |
| inpo | <a href="http://linkedlifedata.com/resource/umls-semnetwork/T037">http://linkedlifedata.com/resource/umls-semnetwork/T037</a> | INJURY_or_POISONING |

|      |                                                                                                                               |                    |
|------|-------------------------------------------------------------------------------------------------------------------------------|--------------------|
| lbpr | <a href="http://linkedlifedata.com/resource/umls-semnetwork/T034">http://linkedlifedata.com/resource/umls-semnetwork/T034</a> | LABORATORY         |
| lbtr | <a href="http://linkedlifedata.com/resource/umls-semnetwork/T034">http://linkedlifedata.com/resource/umls-semnetwork/T034</a> | LABORATORY         |
| podg | <a href="http://linkedlifedata.com/resource/umls-semnetwork/T101">http://linkedlifedata.com/resource/umls-semnetwork/T101</a> | PATIENT            |
| nnon | <a href="http://linkedlifedata.com/resource/calbc-group/CHEM">http://linkedlifedata.com/resource/calbc-group/CHEM</a>         | DRUG               |
| nusq | <a href="http://linkedlifedata.com/resource/calbc-group/GENE">http://linkedlifedata.com/resource/calbc-group/GENE</a>         | MOLECULAR_SEQUENCE |
| aapp | <a href="http://linkedlifedata.com/resource/calbc-group/CHEM">http://linkedlifedata.com/resource/calbc-group/CHEM</a>         | DRUG               |
| carb | <a href="http://linkedlifedata.com/resource/calbc-group/CHEM">http://linkedlifedata.com/resource/calbc-group/CHEM</a>         | DRUG               |
| crbs | <a href="http://linkedlifedata.com/resource/calbc-group/GENE">http://linkedlifedata.com/resource/calbc-group/GENE</a>         | MOLECULAR_SEQUENCE |
| sosy | <a href="http://linkedlifedata.com/resource/umls-semnetwork/T184">http://linkedlifedata.com/resource/umls-semnetwork/T184</a> | SYMPTOM            |
| virs | <a href="http://linkedlifedata.com/resource/umls-semnetwork/T005">http://linkedlifedata.com/resource/umls-semnetwork/T005</a> | VIRUS              |
| vita | <a href="http://linkedlifedata.com/resource/umls-semnetwork/T127">http://linkedlifedata.com/resource/umls-semnetwork/T127</a> | VITAMIN            |
| neop | <a href="http://linkedlifedata.com/resource/umls-semnetwork/T047">http://linkedlifedata.com/resource/umls-semnetwork/T047</a> | DISEASE            |
| nsba | <a href="http://linkedlifedata.com/resource/calbc-group/CHEM">http://linkedlifedata.com/resource/calbc-group/CHEM</a>         | DRUG               |
| orch | <a href="http://linkedlifedata.com/resource/calbc-group/CHEM">http://linkedlifedata.com/resource/calbc-group/CHEM</a>         | DRUG               |
| orga | <a href="http://linkedlifedata.com/resource/calbc-group/CHEM">http://linkedlifedata.com/resource/calbc-group/CHEM</a>         | DRUG               |

|                 |                                                                                                                               |                   |
|-----------------|-------------------------------------------------------------------------------------------------------------------------------|-------------------|
| orgf            | <a href="http://linkedlifedata.com/resource/calbc-group/PHYS">http://linkedlifedata.com/resource/calbc-group/PHYS</a>         | ORGANISM_FUNCTION |
| patf            | <a href="http://linkedlifedata.com/resource/calbc-group/DISO">http://linkedlifedata.com/resource/calbc-group/DISO</a>         | ORGANISM_FUNCTION |
| phsf            | <a href="http://linkedlifedata.com/resource/calbc-group/PHYS">http://linkedlifedata.com/resource/calbc-group/PHYS</a>         | ORGANISM_FUNCTION |
| phsu            | <a href="http://linkedlifedata.com/resource/umls-semnetwork/T200">http://linkedlifedata.com/resource/umls-semnetwork/T200</a> | DRUG              |
| tisu            | <a href="http://linkedlifedata.com/resource/umls-semnetwork/T024">http://linkedlifedata.com/resource/umls-semnetwork/T024</a> | DRUG              |
| tmco            | <a href="http://linkedlifedata.com/resource/umls-semnetwork/T079">http://linkedlifedata.com/resource/umls-semnetwork/T079</a> | TEMPORAL_CONCEPT  |
| topp            | <a href="http://linkedlifedata.com/resource/umls-semnetwork/T061">http://linkedlifedata.com/resource/umls-semnetwork/T061</a> | MEDICAL_PROCEDURE |
| antb            | <a href="http://linkedlifedata.com/resource/umls-semnetwork/T200">http://linkedlifedata.com/resource/umls-semnetwork/T200</a> | DRUG              |
| diap            | <a href="http://linkedlifedata.com/resource/umls-semnetwork/T061">http://linkedlifedata.com/resource/umls-semnetwork/T061</a> | MEDICAL_PROCEDURE |
| fndg            | <a href="http://linkedlifedata.com/resource/umls-semnetwork/T033">http://linkedlifedata.com/resource/umls-semnetwork/T033</a> | FINDING           |
| EDAM_data       | <a href="http://edamontology.org/data">http://edamontology.org/data</a>                                                       | EDAM_DATA         |
| EDAM_format     | <a href="http://edamontology.org/format">http://edamontology.org/format</a>                                                   | EDAM_DATA         |
| EDAM_operation  | <a href="http://edamontology.org/operation">http://edamontology.org/operation</a>                                             | EDAM_OPERATION    |
| EDAM_topic      | <a href="http://edamontology.org/topic">http://edamontology.org/topic</a>                                                     | EDAM_TOPIC        |
| EDAM_identifier | <a href="http://edamontology.org/identifier">http://edamontology.org/identifier</a>                                           | EDAM_ID           |

Figure 1: The results of the NLP framework for the first clinical question as shown in the web application

## Natural Language Processing tagger

### Computational Biomedicine Laboratory

#### FORTH

John has lung cancer and has been treated with carboplatin which is 1

I would like to find literature and reference related to such events for 1

Tools that appear as INPUT and OUTPUT in the clinical question

Show  entries Search:

| score | name                                      | url                                                                                                                                                             | description                                                                                                                                                                                                                                                                                                                                                                                                                                                                                                                                                                                                                                                                                                                                                                                                                    | input                                             | output                                                                                                                                    |
|-------|-------------------------------------------|-----------------------------------------------------------------------------------------------------------------------------------------------------------------|--------------------------------------------------------------------------------------------------------------------------------------------------------------------------------------------------------------------------------------------------------------------------------------------------------------------------------------------------------------------------------------------------------------------------------------------------------------------------------------------------------------------------------------------------------------------------------------------------------------------------------------------------------------------------------------------------------------------------------------------------------------------------------------------------------------------------------|---------------------------------------------------|-------------------------------------------------------------------------------------------------------------------------------------------|
| 4     | EUADR - Literature analysis               | <a href="http://www.myexperiment.org/workflows/2280.html">http://www.myexperiment.org/workflows/2280.html</a>                                                   | The aim of the Literature Analysis workflow is to automate the search of publications related to ADRs corresponding to a given drug/adverse event association. To do so, we defined an approach based on the MeSH thesaurus, using the subheadings ?chemically induced? and ?adverse effects? with the ?Pharmacological Action? knowledge.                                                                                                                                                                                                                                                                                                                                                                                                                                                                                     | Toxicology<br>Adverse effects,<br>Drug identifier | Literature and reference                                                                                                                  |
| 4     | National Cancer Institute SEER API        | <a href="http://www.programmableweb.com/api/national-cancer-institute-seer">http://www.programmableweb.com/api/national-cancer-institute-seer</a>               | The Surveillance, Epidemiology and End Results (SEER) Program, a service of the National Cancer Institute, is a cancer statistics resource. Collected data includes information on the incidence, prevalence and survival from specific geographic areas within the U.S., as well as cancer mortality for the entire country. The SEER API is a RESTful service supporting various program datasets and algorithms, and is available to developers who wish to incorporate SEER resources into their own systems. Exposed resources include Collaborative Staging, the Hematopoietic and Lymphoid Neoplasm Database, NAACCR documentation, the Antineoplastic Drugs Database, and incidence site recode variables. The API returns JSON formatted responses, communicates over HTTPS, and requires a free account and API key. | cancer,<br>cancer mortality                       | hematopoietic, JSON, lymphoid neoplasm, antineoplastic drugs                                                                              |
| 4     | cBio Cancer Genomics Data Server SEER API | <a href="http://www.programmableweb.com/api/cbio-cancer-genomics-data-server-cgds">http://www.programmableweb.com/api/cbio-cancer-genomics-data-server-cgds</a> | The service provides direct access by applications to genetic and genomic data stored by the Memorial Sloan-Kettering Cancer Center. Applications can retrieve information about cancer studies and their genetic findings, genetic profiles and indicators for specific cancer types and gene structures, and similar highly detailed data. Datasets document more than 5000 tumor samples from 20 research studies. API methods support retrieval of cancer research studies, with detailed filtering by specific topics and findings. Methods also allow retrieval of genetic profiles and case lists reported in cancer research, extended mutation data, protein and antibody information, and clinical data.                                                                                                             | cancer,<br>genomic data, genetic data, tumor      | mutation data, clinical data, Tab-delimited text, genetic finding, genetic profile, cancer, protein, antibody information, gene structure |

Showing 1 to 3 of 3 entries Previous **1** Next

\* score : the shown score is a result of the appearance frequency of each tool as input and/or output in the clinical question.

Tools that appear as INPUT or OUTPUT in the clinical question

Show  entries Search:

| score | name                                         | url                                                                                                                                                 | description                                                                                                                                                                                                                                                                                                                                                                                                                                                                                                                                                                                                                                                                                                                                                                                          | input                                         | output                                                                                                                                            |
|-------|----------------------------------------------|-----------------------------------------------------------------------------------------------------------------------------------------------------|------------------------------------------------------------------------------------------------------------------------------------------------------------------------------------------------------------------------------------------------------------------------------------------------------------------------------------------------------------------------------------------------------------------------------------------------------------------------------------------------------------------------------------------------------------------------------------------------------------------------------------------------------------------------------------------------------------------------------------------------------------------------------------------------------|-----------------------------------------------|---------------------------------------------------------------------------------------------------------------------------------------------------|
| 3     | National Cancer Institute caDSR API          | <a href="http://www.programmableweb.com/api/national-cancer-institute-cadsr">http://www.programmableweb.com/api/national-cancer-institute-cadsr</a> | The National Cancer Institute (NCI), a sub agency of the National Institute of Health (NIH), offers the Cancer Data Standards Registry and Repository (caDSR) API to provide users with programmatic access to a database of Common Data Elements (CDEs) created by the NCI to manage biomedical data. The caDSR contains Unified Markup Language (UML) models representing information domains developed by collaborating research partners, and submitted to the database. The semantics of the data elements in these models are extracted and transformed into administered components of the database, while the resulting collection of related CDEs are classified as part of the model and made visible as a collection. This free API operates over REST and returns data via XML and HTML. | cancer,<br>biomedical data                    | XML, biomedical data, HTML, cancer                                                                                                                |
| 3     | The Cancer Genome Atlas API                  | <a href="http://www.programmableweb.com/api/the-cancer-genome-atlas">http://www.programmableweb.com/api/the-cancer-genome-atlas</a>                 | The Cancer Genome Atlas (TCGA) is a project to improve the understanding of the molecular basis of cancer through the application of genome analysis technologies, including large-scale genome sequencing. TCGA offers a collection of APIs that provide REST-based, programmatic access to its information resources. Available information includes annotations, data matrices, data reports, project metadata, and biospecimen metadata.                                                                                                                                                                                                                                                                                                                                                         | genome sequence, cancer genome analysis       | biospecimen metadata, annotations, XML, JSON, data matrices, project metadata                                                                     |
| 3     | MuTect                                       | <a href="http://seqanswers.com/wiki/MuTect">http://seqanswers.com/wiki/MuTect</a>                                                                   | MuTect is a method developed at the Broad Institute for the reliable and accurate identification of somatic point mutations in next generation sequencing data of cancer genomes.                                                                                                                                                                                                                                                                                                                                                                                                                                                                                                                                                                                                                    | cancer genomes                                | cancer genomes mutations                                                                                                                          |
| 3     | China Cancer Database API                    | <a href="http://www.programmableweb.com/api/china-cancer-database">http://www.programmableweb.com/api/china-cancer-database</a>                     | The China Cancer Database is a repository for information about the incidence, mortality, prognosis, therapy, and prevention of cancer. It was established by the Chinese Ministry of Science and Technology to create a uniform and nationwide cancer database. Specific information can be retrieved using SOAP APIs. Documentation for the China Cancer Database is available in both Chinese and English.                                                                                                                                                                                                                                                                                                                                                                                        | cancer                                        | XML, cancer prognosis, cancer therapy, prevention of cancer                                                                                       |
| 2     | Arabidopsis thaliana Microarray Analysis     | <a href="http://www.myexperiment.org/workflows/832.html">http://www.myexperiment.org/workflows/832.html</a>                                         | This workflow searches for genes which are found to be differentially expressed in a microarray study using Arabidopsis thaliana. The workflow requires an input of a list of differentially expressed AffyMetrix Probeset identifiers. Data is then extracted from BioMart to annotate each of the genes. The UniProt identifiers are then sent to KEGG to obtain KEGG gene identifiers. The KEGG gene identifiers are then used to search for pathways in the KEGG pathway database.                                                                                                                                                                                                                                                                                                               | differentially expressed probesets            | gene descriptions, merged pathways, Kegg pathway release, kegg external gene reference, pathway ids                                               |
| 2     | SciBite API                                  | <a href="http://www.programmableweb.com/api/scibite">http://www.programmableweb.com/api/scibite</a>                                                 | SciBite is a drug discovery search engine that continuously scans the internet for new drug-related information. It helps users find new drugs and drug data by tracking the latest news, clinical trials, grants, and blogs relating to pharmaceutical and biotechnology developments. The SciBite API provides programmatic access to its drug discovery data so that other entities can make use of it, and so that informaticians can find new connections within the data.                                                                                                                                                                                                                                                                                                                      | drug                                          | RSS, drug data, drug discovery, JSONP, Text, drug-related information, XML, JSON                                                                  |
| 2     | Pathways and Gene annotations for QTL region | <a href="http://www.myexperiment.org/workflows/16.html">http://www.myexperiment.org/workflows/16.html</a>                                           | This workflow searches for genes which reside in a QTL (Quantitative Trait Loci) region in the mouse, Mus musculus. The workflow requires an input of a chromosome name or number, a QTL start base pair position, QTL end base pair position. Data is then extracted from BioMart to annotate each of the genes found in this region. The Entrez and UniProt identifiers are then sent to KEGG to obtain KEGG gene identifiers. The KEGG gene identifiers are then used to search for pathways in the KEGG pathway database.                                                                                                                                                                                                                                                                        | chromosome name, start position, end position | kegg pathway release report, genes, pathways, gene descriptions, kegg external gene reference, pathway ids, merged pathways, pathway descriptions |
| 2     | DGIdb API                                    | <a href="http://www.programmableweb.com/api/dgldb">http://www.programmableweb.com/api/dgldb</a>                                                     | The Drug Gene Interaction Database (DGIdb) is a database of known and potential drug-gene interactions. The web interface allows users to search for drug-gene interactions by gene, search for genes by category, or browse categories of genes. The API allows users to search for interactions or to retrieve interaction types, drug types, interaction sources, source trust levels, gene categories, and related genes. Information on drug-gene interactions is collected from multiple resources, including                                                                                                                                                                                                                                                                                  | gene, drug                                    | JSON, drug-gene interaction, drug types, gene categories, related genes                                                                           |

FORTH-ICS/CML, © 2014-2015
