# Supplementary material for: Semantic biomedical resource discovery: a Natural Language Processing framework
Source: PubMed Central journal article supplement (PMC4591066; doi:10.1186/s12911-015-0200-4), 2015-09-30
Supplement: 12911_2015_200_MOESM2_ESM.pdf [file 12911_2015_200_MOESM2_ESM.pdf]

| index | Name    | Summary                                                                                                                                                                                                                                                                                                                                                                                                                                                                                                                                                                                                                                              | Bio Tags<br>(Biological application domains) | Meth Tags<br>(Principal bioinformatics methods) | Link                                                                                                                                            | Input (format)                                                                                                                                      | Output (format) | Category    |
|-------|---------|------------------------------------------------------------------------------------------------------------------------------------------------------------------------------------------------------------------------------------------------------------------------------------------------------------------------------------------------------------------------------------------------------------------------------------------------------------------------------------------------------------------------------------------------------------------------------------------------------------------------------------------------------|----------------------------------------------|-------------------------------------------------|-------------------------------------------------------------------------------------------------------------------------------------------------|-----------------------------------------------------------------------------------------------------------------------------------------------------|-----------------|-------------|
| 1     | Abarray | Microarray QA and statistical data analysis for Applied Biosystems Genome Survey Microarray (AB1700) gene expression data. Automated pipeline to perform gene expression analysis for Applied Biosystems Genome Survey Microarray (AB1700) data format. Functions include data preprocessing, filtering, control probe analysis, statistical analysis in one single function. A GUI interface is also provided. The raw data, processed data, graphics output and statistical results are organized into folders according to the analysis settings used.                                                                                            |                                              | Microarray,OneChannel,Preprocessing,Software    | <a href="http://www.bioconductor.org/packages/2.12/bioc/html/ABarray.html">http://www.bioconductor.org/packages/2.12/bioc/html/ABarray.html</a> | Biobase,graphics,grDevices,methods,multitest,stats,tcltk,utils                                                                                      |                 | Microarrays |
| 2     | ACME    | Algorithms for Calculating Microarray Enrichment (ACME). ACME (Algorithms for Calculating Microarray Enrichment) is a set of tools for analysing tiling array ChIP/chip, DNase hypersensitivity, or other experiments that result in regions of the genome showing enrichment. It does not rely on a specific array technology (although the array should be a tiling array), is very general (can be applied in experiments resulting in regions of enrichment), and is very insensitive to array noise or normalization methods. It is also very fast and can be applied on whole-genome tiling array experiments quite easily with enough memory. |                                              | Bioinformatics,Software                         | <a href="http://www.bioconductor.org/packages/2.12/bioc/html/ACME.html">http://www.bioconductor.org/packages/2.12/bioc/html/ACME.html</a>       | graphics,stats                                                                                                                                      |                 | Microarrays |
| 3     | adSplit | Annotation-Driven Clustering.This package implements clustering of microarray gene expression profiles according to functional annotations. For each term genes are annotated to, splits into two subclasses are computed and a significance of the supporting gene set is determined.                                                                                                                                                                                                                                                                                                                                                               |                                              | Bioinformatics,Clustering,Microarray,Software   | <a href="http://www.bioconductor.org/packages/2.12/bioc/html/adSplit.html">http://www.bioconductor.org/packages/2.12/bioc/html/adSplit.html</a> | AnnotationDbi,Biobase(>= 1.5.12),cluster(>= 1.9.1),GO.db(>= 1.8.1),graphics,grDevices,KEGG.db(>= 1.8.1),methods,multitest(>= 1.6.0),stats(>= 2.1.0) |                 | Microarrays |

|   |                     |                                                                                                                                                                                                                                                                                                                                                                                                                                                                                     |  |                                                                                                           |                                                                                                                                                                       |                                                                                                      |  |             |
|---|---------------------|-------------------------------------------------------------------------------------------------------------------------------------------------------------------------------------------------------------------------------------------------------------------------------------------------------------------------------------------------------------------------------------------------------------------------------------------------------------------------------------|--|-----------------------------------------------------------------------------------------------------------|-----------------------------------------------------------------------------------------------------------------------------------------------------------------------|------------------------------------------------------------------------------------------------------|--|-------------|
| 4 | AffyRNA Degradation | Analyze and correct probe positional bias in microarray data due to RNA degradation. The package helps with the assessment and correction of RNA degradation effects in Affymetrix 3' expression arrays. The parameter d gives a robust and accurate measure of RNA integrity. The correction removes the probe positional bias, and thus improves comparability of samples that are affected by RNA degradation.                                                                   |  |                                                                                                           | <a href="http://www.bioconductor.org/packages/2.12/bioc/html/AffyRNADegradation.html">http://www.bioconductor.org/packages/2.12/bioc/html/AffyRNADegradation.html</a> |                                                                                                      |  | Microarrays |
| 5 | AgiMicro Rna        | Processing and Differential Expression Analysis of Agilent microRNA chips                                                                                                                                                                                                                                                                                                                                                                                                           |  | AgilentChip, Bioinformatics, DifferentialExpression, Microarray, OneChannel, Preprocessing, Software      | <a href="http://www.bioconductor.org/packages/release/bioc/html/AgiMicroRna.html">http://www.bioconductor.org/packages/release/bioc/html/AgiMicroRna.html</a>         | Biobase                                                                                              |  | Microarrays |
| 6 | annmap              | Genome annotation and visualisation package pertaining to Affymetrix arrays and NGS analysis. annmap provides annotation mappings for Affymetrix exon arrays and coordinate based queries to support deep sequencing data analysis. Database access is hidden behind the API which provides a set of functions such as genesInRange(), geneToExon(), exonDetails(), etc. Functions to plot gene architecture and BAM file data are also provided. Underlying data are from Ensembl. |  | Annotation, Bioinformatics, Microarray, OneChannel, ReportWriting, Software, Transcription, Visualization | <a href="http://www.bioconductor.org/packages/release/bioc/html/annmap.html">http://www.bioconductor.org/packages/release/bioc/html/annmap.html</a>                   | DBI, RMySQL (>= 0.6-0), digest, Biobase, grid, lattice, Rsamtools, genefilter, IRanges, BiocGenerics |  | Microarrays |
| 7 | antiProfiles        | Implementation of gene expression anti-profiles                                                                                                                                                                                                                                                                                                                                                                                                                                     |  | Classification, GeneExpression, Software                                                                  | <a href="http://www.bioconductor.org/packages/release/bioc/html/antiProfiles.html">http://www.bioconductor.org/packages/release/bioc/html/antiProfiles.html</a>       |                                                                                                      |  | Microarrays |
| 8 | apComplex           | Estimate protein complex membership using AP-MS protein data. Functions to estimate a bipartite graph of protein complex membership using AP-MS data.                                                                                                                                                                                                                                                                                                                               |  | GraphsAndNetworks, MassSpectrometry, NetworkInference, Software                                           | <a href="http://www.bioconductor.org/packages/release/bioc/html/apComplex.html">http://www.bioconductor.org/packages/release/bioc/html/apComplex.html</a>             | Rgraphviz, stats, org.Scd.sgd.db                                                                     |  | Microarrays |

|    |                     |                                                                                                                                                                                                                                                                                                                             |  |                                                                                                          |                                                                                                                                                                               |                                                                                                                                                                                                                                                               |  |             |
|----|---------------------|-----------------------------------------------------------------------------------------------------------------------------------------------------------------------------------------------------------------------------------------------------------------------------------------------------------------------------|--|----------------------------------------------------------------------------------------------------------|-------------------------------------------------------------------------------------------------------------------------------------------------------------------------------|---------------------------------------------------------------------------------------------------------------------------------------------------------------------------------------------------------------------------------------------------------------|--|-------------|
| 9  | aroma.light         | Light-weight methods for normalization and visualization of microarray data using only basic R data types. Methods for microarray analysis that take basic data types such as matrices and lists of vectors. These methods can be used standalone, be utilized in other packages, or be wrapped up in higher-level classes. |  | Infrastructure, Microarray, MultiChannel, OneChannel, Preprocessing, Software, TwoChannel, Visualization | <a href="http://www.bioconductor.org/packages/release/bioc/html/aroma.light.html">http://www.bioconductor.org/packages/release/bioc/html/aroma.light.html</a>                 | R.methodsS3 (>= 1.4.2)                                                                                                                                                                                                                                        |  | Microarrays |
| 10 | arrayQualityMetrics | Quality metrics on microarray data sets. This package generates microarray quality metrics reports for data in Bioconductor microarray data containers (ExpressionSet, NChannelSet, AffyBatch). Report contain both general and platform-specific sections. Both one and two color array platforms are supported.           |  | Microarray, OneChannel, QualityControl, ReportWriting, Software, TwoChannel                              | <a href="http://www.bioconductor.org/packages/release/bioc/html/arrayQualityMetrics.html">http://www.bioconductor.org/packages/release/bioc/html/arrayQualityMetrics.html</a> | affy, affyPLM (>= 1.27.3), beadarray, Biobase, Cairo (>= 1.4-6), genefilter, graphics, grDevices, grid, Hmisc, hwriter, lattice, latticeExtra, limma, methods, RColorBrewer, setRNG, simpleaffy, stats, SVGAnnotation (>= 0.9-0), utils, vsn (>= 3.23.3), XML |  | Microarrays |
| 11 | BCRANK              | Predicting binding site consensus from ranked DNA sequences. Functions and classes for de novo prediction of transcription factor binding consensus by heuristic search                                                                                                                                                     |  | GeneRegulation, MotifDiscovery, Software                                                                 | <a href="http://www.bioconductor.org/packages/release/bioc/html/BCRANK.html">http://www.bioconductor.org/packages/release/bioc/html/BCRANK.html</a>                           | Biostrings                                                                                                                                                                                                                                                    |  | Microarrays |
| 12 | betr                | Identify differentially expressed genes in microarray time-course data. The betr package implements the BETR (Bayesian Estimation of Temporal Regulation) algorithm to identify differentially expressed genes in microarray time-course data.                                                                              |  | Bioinformatics, DifferentialExpression, Microarray, Software, TimeCourse                                 | <a href="http://www.bioconductor.org/packages/release/bioc/html/betr.html">http://www.bioconductor.org/packages/release/bioc/html/betr.html</a>                               | Biobase (>= 2.5.5), limma, mvtnorm, methods, stats                                                                                                                                                                                                            |  | Microarrays |
| 13 | bgafun              | BGAfun A method to identify specificity determining residues in protein families                                                                                                                                                                                                                                            |  | Bioinformatics, Classification, Software                                                                 | <a href="http://www.bioconductor.org/packages/release/bioc/html/bgafun.html">http://www.bioconductor.org/packages/release/bioc/html/bgafun.html</a>                           |                                                                                                                                                                                                                                                               |  | Microarrays |

|    |                 |                                                                                                                                                                                                                                                                                                                                             |  |                                                                                           |                                                                                                                                                                       |                                                                                                                                                                                                                 |  |             |
|----|-----------------|---------------------------------------------------------------------------------------------------------------------------------------------------------------------------------------------------------------------------------------------------------------------------------------------------------------------------------------------|--|-------------------------------------------------------------------------------------------|-----------------------------------------------------------------------------------------------------------------------------------------------------------------------|-----------------------------------------------------------------------------------------------------------------------------------------------------------------------------------------------------------------|--|-------------|
| 14 | Bgmix           | Bayesian models for differential gene expression                                                                                                                                                                                                                                                                                            |  | DifferentialExpression, Microarray, MultipleComparisons, Software                         | <a href="http://www.bioconductor.org/packages/release/bioc/html/BGmix.html">http://www.bioconductor.org/packages/release/bioc/html/BGmix.html</a>                     |                                                                                                                                                                                                                 |  | Microarrays |
| 15 | biocGraph       | Graph examples and use cases in Bioinformatics Bioconductor version: Release (2.12) This package provides examples and code that make use of the different graph related packages produced by Bioconductor.                                                                                                                                 |  | GraphsAndNetworks, NetworkVisualization, Software                                         | <a href="http://www.bioconductor.org/packages/release/bioc/html/biocGraph.html">http://www.bioconductor.org/packages/release/bioc/html/biocGraph.html</a>             | Rgraphviz, geneplotter, graph, BiocGenerics, methods                                                                                                                                                            |  | Microarrays |
| 16 | charm           | Analysis of DNA methylation data from CHARM microarrays. This package implements analysis tools for DNA methylation data generated using Nimblegen microarrays and the McrBC protocol. It finds differentially methylated regions between samples, calculates percentage methylation estimates and includes array quality assessment tools. |  | Bioinformatics, DNAMethylation, Microarray, Software                                      | <a href="http://www.bioconductor.org/packages/release/bioc/html/charm.html">http://www.bioconductor.org/packages/release/bioc/html/charm.html</a>                     | BSgenome, Biobase, oligo(>= 1.11.31), oligoClasses (>= 1.17.39), ff, preprocessCore, methods, stats, Biostrings, IRanges, siggenes, nor1mix, gtools, grDevices, graphics, utils, limma, parallel, sva(>= 3.1.2) |  | Microarrays |
| 17 | clusterProfiler | statistical analysis and visualization of functional profiles for genes and gene clusters. The package implements methods to analyze and visualize functional profiles (GO and KEGG) of gene and gene clusters.                                                                                                                             |  | Clustering, GO, GeneSetEnrichment, MultipleComparisons, Pathways, Software, Visualization | <a href="http://www.bioconductor.org/packages/release/bioc/html/clusterProfiler.html">http://www.bioconductor.org/packages/release/bioc/html/clusterProfiler.html</a> | methods, stats4, DBI, plyr, AnnotationDbi, GO.db, KEGG.db, org.Hs.eg.db, DOSE                                                                                                                                   |  | Microarrays |
| 18 | clusterStab     | Compute cluster stability scores for microarray data. This package can be used to estimate the number of clusters in a set of microarray data, as well as test the stability of these clusters.                                                                                                                                             |  | Clustering, Software                                                                      | <a href="http://www.bioconductor.org/packages/release/bioc/html/clusterStab.html">http://www.bioconductor.org/packages/release/bioc/html/clusterStab.html</a>         |                                                                                                                                                                                                                 |  | Microarrays |

|    |          |                                                                                                                                                                                                                                                                                                                                                                                        |  |                                                                                            |                                                                                                                                                       |                                                         |  |             |
|----|----------|----------------------------------------------------------------------------------------------------------------------------------------------------------------------------------------------------------------------------------------------------------------------------------------------------------------------------------------------------------------------------------------|--|--------------------------------------------------------------------------------------------|-------------------------------------------------------------------------------------------------------------------------------------------------------|---------------------------------------------------------|--|-------------|
| 19 | CMA      | Synthesis of microarray-based classification. This package provides a comprehensive collection of various microarray-based classification algorithms both from Machine Learning and Statistics. Variable Selection, Hyperparameter tuning, Evaluation and Comparison can be performed combined or stepwise in a user-friendly environment.                                             |  | Classification,Software                                                                    | <a href="http://www.bioconductor.org/packages/release/bioc/html/CMA.html">http://www.bioconductor.org/packages/release/bioc/html/CMA.html</a>         |                                                         |  | Microarrays |
| 20 | CNAnorm  | A normalization method for Copy Number Aberration in cancer samples. Performs ratio, GC content correction and normalization of data obtained using low coverage (one read every 100-10,000 bp) high throughput sequencing. It performs a discrete normalization looking for the ploidy of the genome. It will also provide tumour content if at least two ploidy states can be found. |  | Bioinformatics,Cancer,CopyNumberVariants,HighThroughputSequencing,Lung,Sequencing,Software | <a href="http://www.bioconductor.org/packages/release/bioc/html/CNAnorm.html">http://www.bioconductor.org/packages/release/bioc/html/CNAnorm.html</a> | methods                                                 |  | Microarrays |
| 21 | codelink | Manipulation of Codelink Bioarrays data. This packages allow reading into R of Codelink bioarray data exported as text from the Codelink software. Also includes some functions to ease the manipulation and pre-processing of data, such in background correction and normalization.                                                                                                  |  | DataImport,Microarray,OneChannel,Preprocessing,Software                                    | <a href="http://www.bioconductor.org/packages/release/bioc/html/codelink.html">www.bioconductor.org/packages/release/bioc/html/codelink.html</a>      | DataImport,Microarray,OneChannel,Preprocessing,Software |  | Microarrays |
| 22 | coGPS    | cancer outlier Gene Profile Sets. Gene Set Enrichment Analysis of P-value based statistics for outlier gene detection in dataset merged from multiple studies                                                                                                                                                                                                                          |  | Bioinformatics,DifferentialExpression,Microarray,Software                                  | <a href="http://www.bioconductor.org/packages/release/bioc/html/coGPS.html">http://www.bioconductor.org/packages/release/bioc/html/coGPS.html</a>     | graphics,grDevices                                      |  | Microarrays |
| 23 | copa     | Functions to perform cancer outlier profile analysis. COPA is a method to find genes that undergo recurrent fusion in a given cancer type by finding pairs of genes that have mutually exclusive outlier profiles.                                                                                                                                                                     |  | DifferentialExpression,OneChannel,Software,TwoChannel,Visualization                        | <a href="http://www.bioconductor.org/packages/release/bioc/html/copa.html">http://www.bioconductor.org/packages/release/bioc/html/copa.html</a>       |                                                         |  | Microarrays |
| 24 | daMA     | Efficient design and analysis of factorial two-colour microarray data. This package contains functions for the efficient design of factorial two-colour microarray experiments and for the statistical analysis of factorial microarray data.                                                                                                                                          |  | Bioinformatics,DifferentialExpression,Microarray,Software,TwoChannel                       | <a href="http://www.bioconductor.org/packages/release/bioc/html/daMA.html">http://www.bioconductor.org/packages/release/bioc/html/daMA.html</a>       | MASS,stats                                              |  | Microarrays |

|    |             |                                                                                                                                                                                                                                                                                                                                                                                                                                                                                                                                 |  |                                                                         |                                                                                                                                                               |                                            |  |             |
|----|-------------|---------------------------------------------------------------------------------------------------------------------------------------------------------------------------------------------------------------------------------------------------------------------------------------------------------------------------------------------------------------------------------------------------------------------------------------------------------------------------------------------------------------------------------|--|-------------------------------------------------------------------------|---------------------------------------------------------------------------------------------------------------------------------------------------------------|--------------------------------------------|--|-------------|
| 25 | DeconRNASeq | Deconvolution of Heterogeneous Tissue Samples for mRNA-Seq data. DeconSeq is an R package for deconvolution of heterogeneous tissues based on mRNA-Seq data. It modeled expression levels from heterogeneous cell populations in mRNA-Seq as the weighted average of expression from different constituting cell types and predicted cell type proportions of single expression profiles.                                                                                                                                       |  | Bioinformatics, ExperimentData, RNAExpressionData, Software             | <a href="http://www.bioconductor.org/packages/release/bioc/html/DeconRNASeq.html">http://www.bioconductor.org/packages/release/bioc/html/DeconRNASeq.html</a> |                                            |  | Microarrays |
| 26 | DEDS        | Differential Expression via Distance Summary for Microarray Data. This library contains functions that calculate various statistics of differential expression for microarray data, including t statistics, fold change, F statistics, SAM, moderated t and F statistics and B statistics. It also implements a new methodology called DEDS (Differential Expression via Distance Summary), which selects differentially expressed genes by integrating and summarizing a set of statistics using a weighted distance approach. |  | Bioinformatics, DifferentialExpression, Microarray, Software            | <a href="http://www.bioconductor.org/packages/release/bioc/html/DEDS.html">http://www.bioconductor.org/packages/release/bioc/html/DEDS.html</a>               |                                            |  | Microarrays |
| 27 | DEGseq      | Identify Differentially Expressed Genes from RNA-seq data                                                                                                                                                                                                                                                                                                                                                                                                                                                                       |  | DifferentialExpression, GeneExpression, Preprocessing, RNAseq, Software | <a href="http://www.bioconductor.org/packages/release/bioc/html/DEGseq.html">http://www.bioconductor.org/packages/release/bioc/html/DEGseq.html</a>           | graphics, grDevices, methods, stats, utils |  | Microarrays |

|    |                      |                                                                                                                                                                                                                                                                                                                                                                                                                                                                                                                                                                                                                                                                                                                                                                                                                                                                                                                                                                                                                                                                                                                                                                                                                                                 |  |                                                                                                                                                                                                                                                                                                                                                          |                                                                                                                                                                         |                                                                                                                          |  |             |
|----|----------------------|-------------------------------------------------------------------------------------------------------------------------------------------------------------------------------------------------------------------------------------------------------------------------------------------------------------------------------------------------------------------------------------------------------------------------------------------------------------------------------------------------------------------------------------------------------------------------------------------------------------------------------------------------------------------------------------------------------------------------------------------------------------------------------------------------------------------------------------------------------------------------------------------------------------------------------------------------------------------------------------------------------------------------------------------------------------------------------------------------------------------------------------------------------------------------------------------------------------------------------------------------|--|----------------------------------------------------------------------------------------------------------------------------------------------------------------------------------------------------------------------------------------------------------------------------------------------------------------------------------------------------------|-------------------------------------------------------------------------------------------------------------------------------------------------------------------------|--------------------------------------------------------------------------------------------------------------------------|--|-------------|
| 28 | dexus                | DEXUS - Identifying Differential Expression in RNA-Seq Studies with Unknown Conditions or without Replicates. DEXUS identifies differentially expressed genes in RNA-Seq data under all possible study designs such as studies without replicates, without sample groups, and with unknown conditions. DEXUS works also for known conditions, for example for RNA-Seq data with two or multiple conditions. RNA-Seq read count data can be provided both by the S4 class Count Data Set and by read count matrices. Differentially expressed transcripts can be visualized by heatmaps, in which unknown conditions, replicates, and samples groups are also indicated. This software is fast since the core algorithm is written in C. For very large data sets, a parallel version of DEXUS is provided in this package. DEXUS is a statistical model that is selected in a Bayesian framework by an EM algorithm. DEXUS does not need replicates to detect differentially expressed transcripts, since the replicates (or conditions) are estimated by the EM method for each transcript. The method provides an informative/non-informative value to extract differentially expressed transcripts at a desired significance level or power. |  | Bioinformatics,Ce<br>llBiology,Classific<br>ation,Differential<br>Expression,GeneE<br>xpression,HapMa<br>p,HighThroughpu<br>tSequencing,High<br>TroughputSequen<br>cingData,Homo_s<br>apiens,Macaca_<br>mulatta,Mus_mu<br>sculus,Pan_troglo<br>dytes,QualityCont<br>rol,RNAExpressio<br>nData,RNASeq,R<br>NAseqData,Seque<br>ncing,Software,Z<br>ea_Mays | <a href="http://www.bioconductor.org/packages/release/bioc/html/dexus.html">http://www.bioconductor.org/packages/release/bioc/html/dexus.html</a>                       |                                                                                                                          |  | Microarrays |
| 29 | DFP                  | Gene Selection. This package provides a supervised technique able to identify differentially expressed genes, based on the construction of \emph{Fuzzy Patterns} (FPs). The Fuzzy Patterns are built by means of applying 3 Membership Functions to discretized gene expression values.                                                                                                                                                                                                                                                                                                                                                                                                                                                                                                                                                                                                                                                                                                                                                                                                                                                                                                                                                         |  | Bioinformatics,Di<br>fferentialExpressi<br>on,Microarray,So<br>ftware                                                                                                                                                                                                                                                                                    | <a href="http://www.bioconductor.org/packages/release/bioc/html/DFP.html">http://www.bioconductor.org/packages/release/bioc/html/DFP.html</a>                           |                                                                                                                          |  | Microarrays |
| 30 | diffGene<br>Analysis | Performs differential gene expression Analysis. Analyze microarray data                                                                                                                                                                                                                                                                                                                                                                                                                                                                                                                                                                                                                                                                                                                                                                                                                                                                                                                                                                                                                                                                                                                                                                         |  | Bioinformatics,Di<br>fferentialExpressi<br>on,Microarray,So<br>ftware                                                                                                                                                                                                                                                                                    | <a href="http://www.bioconductor.org/packages/release/bioc/html/diffGeneAnalysis.html">http://www.bioconductor.org/packages/release/bioc/html/diffGeneAnalysis.html</a> | graphics,grDevices,m<br>inpack.lm (>= 1.0-<br>4),stats,utils                                                             |  | Microarrays |
| 31 | DOSE                 | Disease Ontology Semantic and Enrichment analysis. Implemented five methods proposed by Resnik, Schlicker, Jiang, Lin and Wang respectively for measuring DO semantic similarities, and hypergeometric test for enrichment analysis.                                                                                                                                                                                                                                                                                                                                                                                                                                                                                                                                                                                                                                                                                                                                                                                                                                                                                                                                                                                                            |  | Annotation,Bioinf<br>ormatics,Softwar<br>e                                                                                                                                                                                                                                                                                                               | <a href="http://www.bioconductor.org/packages/release/bioc/html/DOSE.html">http://www.bioconductor.org/packages/release/bioc/html/DOSE.html</a>                         | methods,plyr,qvalue,<br>stats4,AnnotationDb<br>i,DO.db,org.Hs.eg.db<br>,igraph,scales,reshap<br>e2,graphics,GOSemSi<br>m |  | Microarrays |

|    |                |                                                                                                                                                                                                                                                                                                                                                                                                                                                                                                                                        |  |                                                                                              |                                                                                                                                                                     |                                                               |  |             |
|----|----------------|----------------------------------------------------------------------------------------------------------------------------------------------------------------------------------------------------------------------------------------------------------------------------------------------------------------------------------------------------------------------------------------------------------------------------------------------------------------------------------------------------------------------------------------|--|----------------------------------------------------------------------------------------------|---------------------------------------------------------------------------------------------------------------------------------------------------------------------|---------------------------------------------------------------|--|-------------|
| 32 | ecolitk        | Meta-data and tools for E. coli. Meta-data and tools to work with E. coli. The tools are mostly plotting functions to work with circular genomes. They can be used with other genomes/plasmids.                                                                                                                                                                                                                                                                                                                                        |  | Annotation,Software,Visualization                                                            | <a href="http://www.bioconductor.org/packages/release/bioc/html/ecolitk.html">http://www.bioconductor.org/packages/release/bioc/html/ecolitk.html</a>               | Biobase,graphics,methods                                      |  | Microarrays |
| 33 | EDASeq         | Exploratory Data Analysis and Normalization for RNA-Seq. Numerical and graphical summaries of RNA-Seq read data. Within-lane normalization procedures to adjust for GC-content effect (or other gene-level effects) on read counts: loess robust local regression, global-scaling, and full-quantile normalization (Risso et al., 2011). Between-lane normalization procedures to adjust for distributional differences between lanes (e.g., sequencing depth): global-scaling and full-quantile normalization (Bullard et al., 2010). |  | DifferentialExpression,HighThroughputSequencing,Preprocessing,QualityControl,RNAseq,Software | <a href="http://www.bioconductor.org/packages/release/bioc/html/EDASeq.html">http://www.bioconductor.org/packages/release/bioc/html/EDASeq.html</a>                 | methods,graphics,BiocGenerics,IRanges(>= 1.13.9),DESeq        |  | Microarrays |
| 34 | edgeR          | Empirical analysis of digital gene expression data in R. Differential expression analysis of RNA-seq and digital gene expression profiles with biological replication. Uses empirical Bayes estimation and exact tests based on the negative binomial distribution. Also useful for differential signal analysis with other types of genome-scale count data.                                                                                                                                                                          |  | Bioinformatics,ChIPseq,DifferentialExpression,HighThroughputSequencing,RNAseq,SAGE,Software  | <a href="http://www.bioconductor.org/packages/release/bioc/html/edgeR.html">http://www.bioconductor.org/packages/release/bioc/html/edgeR.html</a>                   |                                                               |  | Microarrays |
| 35 | ExiMiR         | R functions for the normalization of Exiqon miRNA array data. This package contains functions for reading raw data in ImaGene TXT format obtained from Exiqon miRCURY LNA arrays, annotating them with appropriate GAL files, and normalizing them using a spike-in probe-based method. Other platforms and data formats are also supported.                                                                                                                                                                                           |  | DualChannel,GeneExpression,Microarray,OneChannel,Preprocessing,Software,Transcription        | <a href="http://www.bioconductor.org/packages/release/bioc/html/ExiMiR.html">http://www.bioconductor.org/packages/release/bioc/html/ExiMiR.html</a>                 | affyio(>= 1.13.3),Biobase(>= 2.5.5),preprocessCore(>= 1.10.0) |  | Microarrays |
| 36 | ExpressionView | Visualize biclusters identified in gene expression data. ExpressionView visualizes possibly overlapping biclusters in a gene expression matrix. It can use the result of the ISA method (eisa package) or the algorithms in the biclust package or others. The viewer itself was developed using Adobe Flex and runs in a flash-enabled web browser.                                                                                                                                                                                   |  | Classification,GeneExpression,Microarray,Software,Visualization                              | <a href="http://www.bioconductor.org/packages/release/bioc/html/ExpressionView.html">http://www.bioconductor.org/packages/release/bioc/html/ExpressionView.html</a> | methods,isa2,eisa,GO.db,KEGG.db,AnnotationDbi                 |  | Microarrays |
| 37 | factDesign     | Factorial designed microarray experiment analysis. This package provides a set of tools for analyzing data from a factorial designed microarray experiment, or any microarray experiment for which a linear model is appropriate. The functions can be used to evaluate tests of contrast of biological interest and perform single outlier detection.                                                                                                                                                                                 |  | Bioinformatics,DifferentialExpression,Microarray,Software                                    | <a href="http://www.bioconductor.org/packages/release/bioc/html/factDesign.html">http://www.bioconductor.org/packages/release/bioc/html/factDesign.html</a>         | stats                                                         |  | Microarrays |



|    |            |                                                                                                                                                                                                                                                                                                                                                                                                                                                                                                                                                                                                                                                                                                                                                                                                                                                                                                            |  |                                                                                                                                              |                                                                                                                                                             |                                                                                             |  |             |
|----|------------|------------------------------------------------------------------------------------------------------------------------------------------------------------------------------------------------------------------------------------------------------------------------------------------------------------------------------------------------------------------------------------------------------------------------------------------------------------------------------------------------------------------------------------------------------------------------------------------------------------------------------------------------------------------------------------------------------------------------------------------------------------------------------------------------------------------------------------------------------------------------------------------------------------|--|----------------------------------------------------------------------------------------------------------------------------------------------|-------------------------------------------------------------------------------------------------------------------------------------------------------------|---------------------------------------------------------------------------------------------|--|-------------|
| 38 | ffpe       | Quality assessment and control for FFPE microarray expression data. Identify low-quality data using metrics developed for expression data derived from Formalin-Fixed, Paraffin-Embedded (FFPE) data. Also a function for making Concordance at the Top plots (CAT-plots).                                                                                                                                                                                                                                                                                                                                                                                                                                                                                                                                                                                                                                 |  | Bioinformatics, GeneExpression, Microarray, QualityControl, Software                                                                         | <a href="http://www.bioconductor.org/packages/release/bioc/html/ffpe.html">http://www.bioconductor.org/packages/release/bioc/html/ffpe.html</a>             | Biobase, BiocGenerics, affy, lumi, methlyumi, sfsmisc                                       |  | Microarrays |
| 39 | gage       | Generally Applicable Gene-set Enrichment for Pathway Analysis. GAGE is a published method for gene set or pathway analysis. GAGE is generally applicable independent of microarray or RNA-Seq data attributes including sample sizes, experimental designs, assay platforms, and other types of heterogeneity, and consistently achieves superior performance over other frequently used methods. In gage package, we provide functions for basic GAGE analysis, result processing and presentation. We have also built pipeline routines for of multiple GAGE analyses in a batch, comparison between parallel analyses, and combined analysis of heterogeneous data from different sources/studies. In addition, we provide demo microarray data and commonly used gene set data based on KEGG pathways and GO terms. These funtions and data are also useful for gene set analysis using other methods. |  | DifferentialExpression, GO, GeneSetEnrichment, Genetics, Microarray, MultipleComparisons, OneChannel, Pathways, RNAseq, Software, TwoChannel | <a href="http://www.bioconductor.org/packages/release/bioc/html/gage.html">http://www.bioconductor.org/packages/release/bioc/html/gage.html</a>             | graph                                                                                       |  | Microarrays |
| 40 | genArise   | Microarray Analysis tool. genArise is an easy to use tool for dual color microarray data. Its GUI-Tk based environment let any non-experienced user performs a basic, but not simple, data analysis just following a wizard. In addition it provides some tools for the developer.                                                                                                                                                                                                                                                                                                                                                                                                                                                                                                                                                                                                                         |  | Microarray, Preprocessing, Software, TwoChannel                                                                                              | <a href="http://www.bioconductor.org/packages/release/bioc/html/genArise.html">http://www.bioconductor.org/packages/release/bioc/html/genArise.html</a>     | graphics, grDevices, methods, stats, tcltk, utils, xtable                                   |  | Microarrays |
| 41 | genefilter | genefilter: methods for filtering genes from microarray experiments                                                                                                                                                                                                                                                                                                                                                                                                                                                                                                                                                                                                                                                                                                                                                                                                                                        |  | Bioinformatics, Microarray, Software                                                                                                         | <a href="http://www.bioconductor.org/packages/release/bioc/html/genefilter.html">http://www.bioconductor.org/packages/release/bioc/html/genefilter.html</a> | AnnotationDbi, annotate(>= 1.13.7), Biobase(>= 1.99.10), graphics, methods, stats, survival |  | Microarrays |
| 42 | genefu     | Relevant Functions for Gene Expression Analysis, Especially in Breast Cancer. Description: This package contains functions implementing various tasks usually required by gene expression analysis, especially in breast cancer studies: gene mapping between different microarray platforms, identification of molecular subtypes, implementation of published gene signatures, gene selection, survival analysis, ...                                                                                                                                                                                                                                                                                                                                                                                                                                                                                    |  | Classification, Clustering, DifferentialExpression, GeneExpression, Software, Visualization                                                  | <a href="http://www.bioconductor.org/packages/release/bioc/html/genefu.html">http://www.bioconductor.org/packages/release/bioc/html/genefu.html</a>         | amap                                                                                        |  | Microarrays |

|    |                 |                                                                                                                                                                                                                                                                                                                                                                                                                                                                                                                                                                                                                                                   |  |                                                         |                                                                                                                                                                       |                                                                                                                                                                                                                          |  |             |
|----|-----------------|---------------------------------------------------------------------------------------------------------------------------------------------------------------------------------------------------------------------------------------------------------------------------------------------------------------------------------------------------------------------------------------------------------------------------------------------------------------------------------------------------------------------------------------------------------------------------------------------------------------------------------------------------|--|---------------------------------------------------------|-----------------------------------------------------------------------------------------------------------------------------------------------------------------------|--------------------------------------------------------------------------------------------------------------------------------------------------------------------------------------------------------------------------|--|-------------|
| 43 | geneRecommender | A gene recommender algorithm to identify genes coexpressed with a query set of genes. This package contains a targeted clustering algorithm for the analysis of microarray data. The algorithm can aid in the discovery of new genes with similar functions to a given list of genes already known to have closely related functions.                                                                                                                                                                                                                                                                                                             |  | Clustering, Microarray, Software                        | <a href="http://www.bioconductor.org/packages/release/bioc/html/geneRecommender.html">http://www.bioconductor.org/packages/release/bioc/html/geneRecommender.html</a> | Biobase, methods, stats                                                                                                                                                                                                  |  | Microarrays |
| 44 | GenomeGraphs    | Plotting genomic information from Ensembl. Genomic data analyses requires integrated visualization of known genomic information and new experimental data. GenomeGraphs uses the biomaRt package to perform live annotation queries to Ensembl and translates this to e.g. gene/transcript structures in viewports of the grid graphics package. This results in genomic information plotted together with your data. Another strength of GenomeGraphs is to plot different data types such as array CGH, gene expression, sequencing and other data, together in one plot using the same genome coordinate system.                               |  | Microarray, Software, Visualization                     | <a href="http://www.bioconductor.org/packages/release/bioc/html/GenomeGraphs.html">http://www.bioconductor.org/packages/release/bioc/html/GenomeGraphs.html</a>       |                                                                                                                                                                                                                          |  | Microarrays |
| 45 | ggbio           | Visualization tools for genomic data. The ggbio package extends and specializes the grammar of graphics for biological data. The graphics are designed to answer common scientific questions, in particular those often asked of high throughput genomics data. All core Bioconductor data structures are supported, where appropriate. The package supports detailed views of particular genomic regions, as well as genome-wide overviews. Supported overviews include ideograms and grand linear views. High-level plots include sequence fragment length, edge-linked interval to data view, mismatch pileup, and several splicing summaries. |  | Bioinformatics, Infrastructure, Software, Visualization | <a href="http://www.bioconductor.org/packages/release/bioc/html/ggbio.html">http://www.bioconductor.org/packages/release/bioc/html/ggbio.html</a>                     | methods, biovizBase(>= 1.7.8), reshape2, gtable, ggplot2 (>= 0.9.2), BiocGenerics, Biobase, IRanges, GenomicRanges, GenomicFeatures, Rsamtools, BSgenome, gridExtra, scales, plyr, VariantAnnotation, Hmisc, rtracklayer |  | Microarrays |

|    |              |                                                                                                                                                                                                                                                                                                                                                                                                                                                                                                                                                                                                                                                                                                                                                                                                                                                                                                                                                                                                                                                                   |  |                                                                                  |                                                                          |                                                                                                                                                            |  |             |
|----|--------------|-------------------------------------------------------------------------------------------------------------------------------------------------------------------------------------------------------------------------------------------------------------------------------------------------------------------------------------------------------------------------------------------------------------------------------------------------------------------------------------------------------------------------------------------------------------------------------------------------------------------------------------------------------------------------------------------------------------------------------------------------------------------------------------------------------------------------------------------------------------------------------------------------------------------------------------------------------------------------------------------------------------------------------------------------------------------|--|----------------------------------------------------------------------------------|--------------------------------------------------------------------------|------------------------------------------------------------------------------------------------------------------------------------------------------------|--|-------------|
| 46 | GlobalAncova | <p>Calculates a global test for differential gene expression between groups. We give the following arguments in support of the GlobalAncova approach: After appropriate normalisation, gene-expression-data appear rather symmetrical and outliers are no real problem, so least squares should be rather robust. ANCOVA with interaction yields saturated data modelling e.g. different means per group and gene. Covariate adjustment can help to correct for possible selection bias. Variance homogeneity and uncorrelated residuals cannot be expected. Application of ordinary least squares gives unbiased, but no longer optimal estimates (Gauss-Markov-Aitken). Therefore, using the classical F-test is inappropriate, due to correlation. The test statistic however mirrors deviations from the null hypothesis. In combination with a permutation approach, empirical significance levels can be approximated. Alternatively, an approximation yields asymptotic p-values. This work was supported by the NGFN grant 01 GR 0459, BMBF, Germany.</p> |  | Bioinformatics,DifferentialExpression,Microarray,OnlineChannel,Pathways,Software | http://www.bioconductor.org/packages/release/bioc/html/GlobalAncova.html | annotate,AnnotationDbi                                                                                                                                     |  | Microarrays |
| 47 | GOSemSim     | <p>GO-terms Semantic Similarity Measures. Implemented five methods proposed by Resnik, Schlicker, Jiang, Lin and Wang respectively for estimating GO semantic similarities. Support many species, including Anopheles, Arabidopsis, Bovine, Canine, Chicken, Chimp, Coelocolor, E coli strain K12 and Sakai, Fly, Human, Malaria, Mouse, Pig, Rhesus, Rat, Worm, Xenopus, Yeast, and Zebrafish.</p>                                                                                                                                                                                                                                                                                                                                                                                                                                                                                                                                                                                                                                                               |  | Clustering,GO,NetworkAnalysis,Pathways,Software                                  | www.bioconductor.org/packages/release/bioc/html/GOSemSim.html            | methods,AnnotationDbi,GO.db,org.Hs.eg.db                                                                                                                   |  | Microarrays |
| 48 | Gostats      | <p>Tools for manipulating GO and microarrays. A set of tools for interacting with GO and microarray data. A variety of basic manipulation tools for graphs, hypothesis testing and other simple calculations.</p>                                                                                                                                                                                                                                                                                                                                                                                                                                                                                                                                                                                                                                                                                                                                                                                                                                                 |  | biocViews Annotation,Bioinformatics,GO,MultipleComparisons,Software              | http://www.bioconductor.org/packages/release/bioc/html/GOstats.html      | AnnotationDbi(>= 0.0.89),Biobase(>= 1.15.29),Category(>= 2.3.26),GO.db(>= 1.13.0),RBGL,annotate(>= 1.13.2),graph(>= 1.15.15),methods,stats,AnnotationForge |  | Microarrays |

|    |             |                                                                                                                                                                                                                                                                                                                                                                                                 |  |                                                                                                               |                                                                                                                                                               |                                                                                                                                                 |  |             |
|----|-------------|-------------------------------------------------------------------------------------------------------------------------------------------------------------------------------------------------------------------------------------------------------------------------------------------------------------------------------------------------------------------------------------------------|--|---------------------------------------------------------------------------------------------------------------|---------------------------------------------------------------------------------------------------------------------------------------------------------------|-------------------------------------------------------------------------------------------------------------------------------------------------|--|-------------|
| 49 | goTools     | Functions for Gene Ontology databaseBioconductor version: Release (2.12) Wrapper functions for description/comparison of oligo ID list using Gene Ontology database                                                                                                                                                                                                                             |  | GO, Microarray, Software, Visualization                                                                       | <a href="http://www.bioconductor.org/packages/release/bioc/html/goTools.html">http://www.bioconductor.org/packages/release/bioc/html/goTools.html</a>         | AnnotationDbi, GO.db, graphics, grDevices                                                                                                       |  | Microarrays |
| 50 | biomvRCNS   | Copy Number study and Segmentation for multivariate biological data. In this package, a Hidden Semi Markov Model (HSMM) and one homogeneous segmentation model are designed and implemented for segmentation genomic data, with the aim of assisting in transcripts detection using high throughput technology like RNA-seq or tiling array, and copy number analysis using aCGH or sequencing. |  | CopyNumberVariants, Genetics, HighThroughputSequencing, Microarray, Sequencing, Software, Visualization, aCGH | <a href="http://www.bioconductor.org/packages/release/bioc/html/biomvRCNS.html">http://www.bioconductor.org/packages/release/bioc/html/biomvRCNS.html</a>     | methods, mvtnorm                                                                                                                                |  | Microarrays |
| 51 | BioSeqClass | Classification for Biological Sequences. Extracting Features from Biological Sequences and Building Classification Model                                                                                                                                                                                                                                                                        |  | Classification, Software                                                                                      | <a href="http://www.bioconductor.org/packages/release/bioc/html/BioSeqClass.html">http://www.bioconductor.org/packages/release/bioc/html/BioSeqClass.html</a> | Biostrings, ipred, e1071, klaR, randomForest, class, tree, nnet, rpart, party, foreign, Biobase, utils, stats, grDevices                        |  | Microarrays |
| 52 | biovizBase  | Basic graphic utilities for visualization of genomic data. The biovizBase package is designed to provide a set of utilities, color schemes and conventions for genomic data. It serves as the base for various high-level packages for biological data visualization. This saves development effort and encourages consistency.                                                                 |  | Bioinformatics, Infrastructure, Preprocessing, Software, Visualization                                        | <a href="http://www.bioconductor.org/packages/release/bioc/html/biovizBase.html">http://www.bioconductor.org/packages/release/bioc/html/biovizBase.html</a>   | methods, grDevices, stats, scales, Hmisc, RColorBrewer, dichromat, BiocGenerics, IRanges, GenomicRanges, Biostrings, Rsamtools, GenomicFeatures |  | Microarrays |

|    |                        |                                                                                                                                                                                                                                                                                                                                                                                                                                                                                                                                                                                                                                                                                           |  |                                                                     |                                                                                                                                                                              |                                          |  |             |
|----|------------------------|-------------------------------------------------------------------------------------------------------------------------------------------------------------------------------------------------------------------------------------------------------------------------------------------------------------------------------------------------------------------------------------------------------------------------------------------------------------------------------------------------------------------------------------------------------------------------------------------------------------------------------------------------------------------------------------------|--|---------------------------------------------------------------------|------------------------------------------------------------------------------------------------------------------------------------------------------------------------------|------------------------------------------|--|-------------|
| 53 | CancerMutationAnalysis | Cancer mutation analysis. This package implements gene and gene-set level analysis methods for somatic mutation studies of cancer. The gene-level methods distinguish between driver genes (which play an active role in tumorigenesis) and passenger genes (which are mutated in tumor samples, but have no role in tumorigenesis) and incorporate a two-stage study design. The gene-set methods implement a patient-oriented approach, which calculates gene-set scores for each sample, then combines them across samples; a gene-oriented approach which uses the Wilcoxon test is also provided for comparison.                                                                     |  | Bioinformatics, Genetics, Software                                  | <a href="http://www.bioconductor.org/packages/release/bioc/html/CancerMutationAnalysis.html">www.bioconductor.org/packages/release/bioc/html/CancerMutationAnalysis.html</a> | AnnotationDbi, limma, methods, stats     |  | Microarrays |
| 54 | GraphPAC               | Identification of Mutational Clusters in Proteins via a Graph Theoretical Approach. Identifies mutational clusters of amino acids in a protein while utilizing the proteins tertiary structure via a graph theoretical model.                                                                                                                                                                                                                                                                                                                                                                                                                                                             |  | Bioinformatics, BiologicalDomains, Clustering, Proteomics, Software | <a href="http://www.bioconductor.org/packages/release/bioc/html/GraphPAC.html">http://www.bioconductor.org/packages/release/bioc/html/GraphPAC.html</a>                      |                                          |  | Microarrays |
| 55 | GSVA                   | Gene Set Variation Analysis for microarray and RNA-seq data. Gene Set Variation Analysis (GSVA) is a non-parametric, unsupervised method for estimating variation of gene set enrichment through the samples of an expression data set. GSVA performs a change in coordinate systems, transforming the data from a gene by sample matrix to a gene-set by sample matrix, thereby allowing the evaluation of pathway enrichment for each sample. This new matrix of GSVA enrichment scores facilitates applying standard analytical methods like functional enrichment, survival analysis, clustering, CNV-pathway analysis or cross-tissue pathway analysis, in a pathway-centric manner. |  | GeneSetEnrichment, Microarray, Pathways, Software                   | <a href="http://www.bioconductor.org/packages/release/bioc/html/GSVA.html">http://www.bioconductor.org/packages/release/bioc/html/GSVA.html</a>                              | methods, BiocGenerics, Biobase, GSEABase |  | Microarrays |

|    |            |                                                                                                                                                                                                                                                                                                                                                                                                                                                                                                                     |  |                                                                                    |                                                                                                                                                             |                                                                                                                                                                                                                                                                                                            |             |
|----|------------|---------------------------------------------------------------------------------------------------------------------------------------------------------------------------------------------------------------------------------------------------------------------------------------------------------------------------------------------------------------------------------------------------------------------------------------------------------------------------------------------------------------------|--|------------------------------------------------------------------------------------|-------------------------------------------------------------------------------------------------------------------------------------------------------------|------------------------------------------------------------------------------------------------------------------------------------------------------------------------------------------------------------------------------------------------------------------------------------------------------------|-------------|
| 56 | Gviz       | Plotting data and annotation information along genomic coordinates. Genomic data analyses requires integrated visualization of known genomic information and new experimental data. Gviz uses the biomaRt and the rtracklayer packages to perform live annotation queries to Ensembl and UCSC and translates this to e.g. gene/transcript structures in viewports of the grid graphics package. This results in genomic information plotted together with your data.                                                |  | Microarray, Software, Visualization                                                | <a href="http://www.bioconductor.org/packages/release/bioc/html/Gviz.html">http://www.bioconductor.org/packages/release/bioc/html/Gviz.html</a>             | IRanges(>= 1.13.19), rtracklayer(>= 1.15.5), lattice, RColorBrewer, biomaRt(>= 2.11.0), GenomicRanges(>= 1.7.14), AnnotationDbi(>= 1.17.11), Biobase(>= 2.15.3), BiocGenerics(>= 0.1.4), GenomicFeatures(>= 1.9.7), BSgenome(>= 1.25.1), Biostrings(>= 2.25.1), biovizBase(>= 1.5.7), Rsamtools(>= 1.11.1) | Microarrays |
| 57 | GWASTools  | Tools for Genome Wide Association Studies. Classes for storing very large GWAS data sets and annotation, and functions for GWAS data cleaning and analysis.                                                                                                                                                                                                                                                                                                                                                         |  | GeneticVariability, Microarray, QualityControl, SNP, Software                      | <a href="http://www.bioconductor.org/packages/release/bioc/html/GWASTools.html">http://www.bioconductor.org/packages/release/bioc/html/GWASTools.html</a>   | methods, DBI, RSQLite, GWASExactHW, DNACopy, survival, lmtree, quantsmooth                                                                                                                                                                                                                                 | Microarrays |
| 58 | Harshlight | A corrective make-up program for microarray chips. The package is used to detect extended, diffuse and compact blemishes on microarray chips. Harshlight automatically marks the areas in a collection of chips (affybatch objects) and a corrected AffyBatch object is returned, in which the defected areas are substituted with NAs or the median of the values of the same probe in the other chips in the collection. The new version handle the substitute value as whole matrix to solve the memory problem. |  | AffymetrixChip, Microarray, Preprocessing, QualityControl, ReportWriting, Software | <a href="http://www.bioconductor.org/packages/release/bioc/html/Harshlight.html">http://www.bioconductor.org/packages/release/bioc/html/Harshlight.html</a> | affy, altcdfenvs, Biobase, stats, utils                                                                                                                                                                                                                                                                    | Microarrays |

|    |           |                                                                                                                                                                                                                                                                                                                                                                                                                                                                                                                                                                                                                                                                                                                                                                                                                     |  |                                                                                |                                                                                                                                                           |                                                         |  |             |
|----|-----------|---------------------------------------------------------------------------------------------------------------------------------------------------------------------------------------------------------------------------------------------------------------------------------------------------------------------------------------------------------------------------------------------------------------------------------------------------------------------------------------------------------------------------------------------------------------------------------------------------------------------------------------------------------------------------------------------------------------------------------------------------------------------------------------------------------------------|--|--------------------------------------------------------------------------------|-----------------------------------------------------------------------------------------------------------------------------------------------------------|---------------------------------------------------------|--|-------------|
| 59 | iASeq     | iASeq: integrating multiple sequencing datasets for detecting allele-specific events. It fits correlation motif model to multiple RNAseq or ChIPseq studies to improve detection of allele-specific events and describe correlation patterns across studies.                                                                                                                                                                                                                                                                                                                                                                                                                                                                                                                                                        |  | Bioinformatics,ChIPseq,RNAseq,SNP,Software                                     | <a href="http://www.bioconductor.org/packages/release/bioc/html/iASeq.html">http://www.bioconductor.org/packages/release/bioc/html/iASeq.html</a>         | graphics,grDevices                                      |  | Microarrays |
| 60 | imageHTS  | Analysis of high-throughput microscopy-based screens. imageHTS is an R package dedicated to the analysis of high-throughput microscopy-based screens. The package provides a modular and extensible framework to segment cells, extract quantitative cell features, predict cell types and browse screen data through web interfaces. Designed to operate in distributed environments, imageHTS provides a standardized access to remote data and facilitates the dissemination of high-throughput microscopy-based datasets.                                                                                                                                                                                                                                                                                       |  | CellBasedAssays,Preprocessing,Software,Visualization                           | <a href="http://www.bioconductor.org/packages/release/bioc/html/imageHTS.html">http://www.bioconductor.org/packages/release/bioc/html/imageHTS.html</a>   | tools,Biobase,hwriter,methods,vsn,stats,utils,e1071     |  | Microarrays |
| 61 | maSigPro  | Significant Gene Expression Profile Differences in Time Course Microarray Data. maSigPro is a regression based approach to find genes for which there are significant gene expression profile differences between experimental groups in time course microarray experiments.                                                                                                                                                                                                                                                                                                                                                                                                                                                                                                                                        |  | DifferentialExpression,Microarray,Software,TimeCourse                          | <a href="http://www.bioconductor.org/packages/release/bioc/html/maSigPro.html">http://www.bioconductor.org/packages/release/bioc/html/maSigPro.html</a>   | Biobase,graphics,grDevices,limma,Mfuzz,stats,utils,MASS |  | Microarrays |
| 62 | MassArray | Analytical Tools for MassArray Data. This package is designed for the import, quality control, analysis, and visualization of methylation data generated using Sequenom's MassArray platform. The tools herein contain a highly detailed amplicon prediction for optimal assay design. Also included are quality control measures of data, such as primer dimer and bisulfite conversion efficiency estimation. Methylation data are calculated using the same algorithms contained in the EpiTyper software package. Additionally, automatic SNP-detection can be used to flag potentially confounded data from specific CG sites. Visualization includes barplots of methylation data as well as UCSC Genome Browser-compatible BED tracks. Multiple assays can be positionally combined for integrated analysis. |  | DNAMethylation,DataImport,Genetics,MassSpectrometry,SNP,Software,Visualization | <a href="http://www.bioconductor.org/packages/release/bioc/html/MassArray.html">http://www.bioconductor.org/packages/release/bioc/html/MassArray.html</a> | graphics,grDevices,methods,stats,utils                  |  | Microarrays |
| 63 | mBPCR     | Bayesian Piecewise Constant Regression for DNA copy number estimation. Estimates the DNA copy number profile using mBPCR to detect regions with copy number changes                                                                                                                                                                                                                                                                                                                                                                                                                                                                                                                                                                                                                                                 |  | Bioinformatics,CopyNumberVariants,Microarray,SNP,Software,aCGH                 | <a href="http://www.bioconductor.org/packages/release/bioc/html/mBPCR.html">http://www.bioconductor.org/packages/release/bioc/html/mBPCR.html</a>         | Biobase                                                 |  | Microarrays |

|    |               |                                                                                                                                                                                                                                                                                                                                                                                                                                   |  |                                                                             |                                                                                                                                                                   |                                                                                                                                                                |  |             |
|----|---------------|-----------------------------------------------------------------------------------------------------------------------------------------------------------------------------------------------------------------------------------------------------------------------------------------------------------------------------------------------------------------------------------------------------------------------------------|--|-----------------------------------------------------------------------------|-------------------------------------------------------------------------------------------------------------------------------------------------------------------|----------------------------------------------------------------------------------------------------------------------------------------------------------------|--|-------------|
| 64 | mcaGUI        | Microbial Community Analysis GUI. Microbial community analysis GUI for R using gWidgets.                                                                                                                                                                                                                                                                                                                                          |  | Bioinformatics, Clustering, GUI, Sequencing, Software, Visualization        | <a href="http://www.bioconductor.org/packages/release/bioc/html/mcaGUI.html">http://www.bioconductor.org/packages/release/bioc/html/mcaGUI.html</a>               |                                                                                                                                                                |  | Microarrays |
| 65 | metaArray     | Integration of Microarray Data for Meta-analysis. 1) Data transformation for meta-analysis of microarray Data: Transformation of gene expression data to signed probability scale (MCMC/EM methods) 2) Combined differential expression on raw scale: Weighted Z-score after stabilizing mean-variance relation within platform.                                                                                                  |  | Bioinformatics, Differential Expression, Microarray, Software               | <a href="http://www.bioconductor.org/packages/release/bioc/html/metaArray.html">http://www.bioconductor.org/packages/release/bioc/html/metaArray.html</a>         | Biobase, MergeMaid, graphics, stats                                                                                                                            |  | Microarrays |
| 66 | methVisual    | Methods for visualization and statistics on DNA methylation data. The package 'methVisual' allows the visualization of DNA methylation data after bisulfite sequencing.                                                                                                                                                                                                                                                           |  | Bioinformatics, Classification, Clustering, DNAMethylation, Software        | <a href="http://www.bioconductor.org/packages/release/bioc/html/methVisual.html">http://www.bioconductor.org/packages/release/bioc/html/methVisual.html</a>       | Biostrings, ca, graphics, grDevices, grid, gridBase, IRanges, stats, utils                                                                                     |  | Microarrays |
| 67 | methyAnalysis | DNA methylation data analysis and visualization. The methyAnalysis package aims for the DNA methylation data analysis and visualization. A new class is defined to keep the chromosome location information together with the data. The current version of the package mainly focus on analyzing the Illumina Infinium methylation array data, but most methods can be generalized to other methylation array or sequencing data. |  | DNAMethylation, Microarray, Software, Visualization                         | <a href="http://www.bioconductor.org/packages/release/bioc/html/methyAnalysis.html">http://www.bioconductor.org/packages/release/bioc/html/methyAnalysis.html</a> | lumi, methylumi, Gviz, genoset, GenomicRanges, IRanges, rtracklayer, GenomicFeatures, annotate, Biobase(>= 2.5.5), AnnotationDbi, genefilter, biomaRt, methods |  | Microarrays |
| 68 | Mfuzz         | Soft clustering of time series gene expression data. Package for noise-robust soft clustering of gene expression time-series data (including a graphical user interface)                                                                                                                                                                                                                                                          |  | Clustering, Microarray, Preprocessing, Software, Time Course, Visualization | <a href="http://www.bioconductor.org/packages/release/bioc/html/Mfuzz.html">http://www.bioconductor.org/packages/release/bioc/html/Mfuzz.html</a>                 | tcltk, tkWidgets                                                                                                                                               |  | Microarrays |
| 69 | mgsa          | Model-based gene set analysis. Model-based Gene Set Analysis (MGSA) is a Bayesian modeling approach for gene set enrichment. The package mgsa implements MGSA and tools to use MGSA together with the Gene Ontology.                                                                                                                                                                                                              |  | GO, GeneSetEnrichment, Pathways, Software                                   | <a href="http://www.bioconductor.org/packages/release/bioc/html/mgsa.html">http://www.bioconductor.org/packages/release/bioc/html/mgsa.html</a>                   | graphics, stats, utils                                                                                                                                         |  | Microarrays |



|    |               |                                                                                                                                                                                                                                                                                                                                                                                                                                                                                                                                                          |  |                                                                                                                                                                                         |                                                                                                                                                                   |                           |  |             |
|----|---------------|----------------------------------------------------------------------------------------------------------------------------------------------------------------------------------------------------------------------------------------------------------------------------------------------------------------------------------------------------------------------------------------------------------------------------------------------------------------------------------------------------------------------------------------------------------|--|-----------------------------------------------------------------------------------------------------------------------------------------------------------------------------------------|-------------------------------------------------------------------------------------------------------------------------------------------------------------------|---------------------------|--|-------------|
| 70 | microRNA<br>A | Data and functions for dealing with microRNAs. Different data resources for microRNAs and some functions for manipulating them.                                                                                                                                                                                                                                                                                                                                                                                                                          |  | Infrastructure, SequenceAnnotation, SequenceMatching, Software                                                                                                                          | <a href="http://www.bioconductor.org/packages/release/bioc/html/microRNA.html">http://www.bioconductor.org/packages/release/bioc/html/microRNA.html</a>           | Biostrings(>=2.11.32)     |  | Microarrays |
| 71 | miRNAPath     | miRNAPath: Pathway Enrichment for miRNA Expression Data. This package provides pathway enrichment techniques for miRNA expression data. Specifically, the set of methods handles the many-to-many relationship between miRNAs and the multiple genes they are predicted to target (and thus affect.) It also handles the gene-to-pathway relationships separately. Both steps are designed to preserve the additive effects of miRNAs on genes, many miRNAs affecting one gene, one miRNA affecting multiple genes, or many miRNAs affecting many genes. |  | Annotation, DifferentialExpression, NetworkEnrichment, Pathways, Software, miRNA                                                                                                        | <a href="http://www.bioconductor.org/packages/release/bioc/html/miRNAPath.html">http://www.bioconductor.org/packages/release/bioc/html/miRNAPath.html</a>         |                           |  | Microarrays |
| 72 | MmPalateMiRNA | Murine Palate miRNA Expression Analysis. R package compendium for the analysis of murine palate miRNA two-color expression data.                                                                                                                                                                                                                                                                                                                                                                                                                         |  | Bioinformatics, Clustering, DifferentialExpression, GO, Microarray, MultipleComparisons, Pathways, Preprocessing, QualityControl, ReportWriting, SequenceMatching, Software, TwoChannel | <a href="http://www.bioconductor.org/packages/release/bioc/html/MmPalateMiRNA.html">http://www.bioconductor.org/packages/release/bioc/html/MmPalateMiRNA.html</a> | limma, lattice, Biobase   |  | Microarrays |
| 73 | motifStack    | Plot stacked logos for single or multiple DNA, RNA and amino acid sequence. The motifStack package is designed for graphic representation of multiple motifs with different similarity scores. It works with both DNA/RNA sequence motif and amino acid sequence motif. In addition, it provides the flexibility for users to customize the graphic parameters such as the font type and symbol colors.                                                                                                                                                  |  | GenomicsSequence, SequenceMatching, Software, Visualization                                                                                                                             | <a href="http://www.bioconductor.org/packages/release/bioc/html/motifStack.html">http://www.bioconductor.org/packages/release/bioc/html/motifStack.html</a>       | grImport, grid, XML, ade4 |  | Microarrays |

|    |        |                                                                                                                                                                                                                                                                                                                                                                                                                                                           |  |                                                                                              |                                                                                                                                                     |                                              |  |             |
|----|--------|-----------------------------------------------------------------------------------------------------------------------------------------------------------------------------------------------------------------------------------------------------------------------------------------------------------------------------------------------------------------------------------------------------------------------------------------------------------|--|----------------------------------------------------------------------------------------------|-----------------------------------------------------------------------------------------------------------------------------------------------------|----------------------------------------------|--|-------------|
| 74 | nnNorm | Spatial and intensity based normalization of cDNA microarray data based on robust neural nets. This package allows to detect and correct for spatial and intensity biases with two-channel microarray data. The normalization method implemented in this package is based on robust neural networks fitting.                                                                                                                                              |  | Microarray,Preprocessing,Software,TwoChannel                                                 | <a href="http://www.bioconductor.org/packages/release/bioc/html/nnNorm.html">http://www.bioconductor.org/packages/release/bioc/html/nnNorm.html</a> | graphics,grDevices,marray,methods,nnet,stats |  | Microarrays |
| 75 | NOISeq | Exploratory analysis and differential expression for RNA-seq data. Analysis of RNA-seq expression data or other similar kind of data. Exploratory plots to evaluate saturation, count distribution, expression per chromosome, type of detected features, features length, etc. Differential expression between two experimental conditions with no parametric assumptions.                                                                               |  | Bioinformatics,DifferentialExpression,HighThroughputSequencing,RNAseq,Software,Visualization | <a href="http://www.bioconductor.org/packages/release/bioc/html/NOISeq.html">http://www.bioconductor.org/packages/release/bioc/html/NOISeq.html</a> |                                              |  | Microarrays |
| 76 | NuPoP  | An R package for nucleosome positioning prediction. NuPoP is an R package for Nucleosome Positioning Prediction.                                                                                                                                                                                                                                                                                                                                          |  | Classification,Genetics,Software,Visualization                                               | <a href="http://www.bioconductor.org/packages/release/bioc/html/NuPoP.html">http://www.bioconductor.org/packages/release/bioc/html/NuPoP.html</a>   |                                              |  | Microarrays |
| 77 | Ocplus | Operating characteristics plus sample size and local fdr for microarray experiments. This package allows to characterize the operating characteristics of a microarray experiment, i.e. the trade-off between false discovery rate and the power to detect truly regulated genes. The package includes tools both for planned experiments (for sample size assessment) and for already collected data (identification of differentially expressed genes). |  | Bioinformatics,DifferentialExpression,Microarray,MultipleComparisons,Software                | <a href="http://www.bioconductor.org/packages/release/bioc/html/Ocplus.html">http://www.bioconductor.org/packages/release/bioc/html/Ocplus.html</a> | multtest(>=1.7.3),graphics,grDevices,stats   |  | Microarrays |

|    |               |                                                                                                                                                                                                                                                                                                                                                                                |  |                                                                                                                                                                             |                                                                                                                                                                   |                                                                                                                                                                                                        |  |             |
|----|---------------|--------------------------------------------------------------------------------------------------------------------------------------------------------------------------------------------------------------------------------------------------------------------------------------------------------------------------------------------------------------------------------|--|-----------------------------------------------------------------------------------------------------------------------------------------------------------------------------|-------------------------------------------------------------------------------------------------------------------------------------------------------------------|--------------------------------------------------------------------------------------------------------------------------------------------------------------------------------------------------------|--|-------------|
| 78 | oligo         | Preprocessing tools for oligonucleotide arrays. A package to analyze oligonucleotide arrays (expression/SNP/tiling/exon) at probe-level. It currently supports Affymetrix (CEL files) and NimbleGen arrays (XYS files).                                                                                                                                                        |  | Bioinformatics, DataImport, DifferentialExpression, ExpressionArray, GeneExpression, Microarray, OneChannel, Preprocessing, SNP, Software, TwoChannel                       | <a href="http://www.bioconductor.org/packages/release/bioc/html/oligo.html">http://www.bioconductor.org/packages/release/bioc/html/oligo.html</a>                 | affyio(>= 1.25.0), affxparser(>= 1.29.11), Bioststrings(>= 2.25.12), BiocGenerics(>= 0.3.2), DBI (>= 0.2-5), ff, graphics, methods, preprocessCore(>= 1.19.0), splines, stats, stats4, utils, zlibbioc |  | Microarrays |
| 79 | OLIN          | Optimized local intensity-dependent normalisation of two-color microarrays. Functions for normalisation of two-color microarrays by optimised local regression and for detection of artefacts in microarray data                                                                                                                                                               |  | Microarray, Preprocessing, QualityControl, Software, TwoChannel, Visualization                                                                                              | <a href="http://www.bioconductor.org/packages/release/bioc/html/OLIN.html">http://www.bioconductor.org/packages/release/bioc/html/OLIN.html</a>                   | graphics, grDevices, limma, marray, methods, stats                                                                                                                                                     |  | Microarrays |
| 80 | oneChannelGUI | A graphical interface designed to facilitate analysis of microarrays and miRNA/RNA-seq data on laptops. This package was developed to simplify the use of Bioconductor tools for beginners having limited or no experience in writing R code. This library provides a graphical interface for microarray gene and exon level analysis as well as miRNA/mRNA-seq data analysis. |  | DataImport, DifferentialExpression, GUI, HighThroughputSequencing, Microarray, MultipleComparisons, OneChannel, Preprocessing, QualityControl, RNAseq, Software, Statistics | <a href="http://www.bioconductor.org/packages/release/bioc/html/oneChannelGUI.html">http://www.bioconductor.org/packages/release/bioc/html/oneChannelGUI.html</a> |                                                                                                                                                                                                        |  | Microarrays |

|    |            |                                                                                                                                                                                                                                                                                                                                                                                                                                                                                                                                                                                                             |  |                                                                                                                                                                                                |                                                                                                                                                             |                                                                                     |  |             |
|----|------------|-------------------------------------------------------------------------------------------------------------------------------------------------------------------------------------------------------------------------------------------------------------------------------------------------------------------------------------------------------------------------------------------------------------------------------------------------------------------------------------------------------------------------------------------------------------------------------------------------------------|--|------------------------------------------------------------------------------------------------------------------------------------------------------------------------------------------------|-------------------------------------------------------------------------------------------------------------------------------------------------------------|-------------------------------------------------------------------------------------|--|-------------|
| 81 | PADOG      | Pathway Analysis with Down-weighting of Overlapping Genes (PADOG). This package implements a general purpose gene set analysis method called PADOG that downplays the importance of genes that appear often across the sets of genes to be analyzed. The package provides also a benchmark for gene set analysis methods in terms of sensitivity and ranking using 24 public datasets from KEGGdzPathwaysGEO package.                                                                                                                                                                                       |  | Bioinformatics, Microarray, OneChannel, Software, TwoChannel                                                                                                                                   | <a href="http://www.bioconductor.org/packages/release/bioc/html/PADOG.html">http://www.bioconductor.org/packages/release/bioc/html/PADOG.html</a>           | graphics,limma,hgu133plus2.db,hgu133a.db,KEGG.db,AnnotationDbi,Biobase,methods,nlme |  | Microarrays |
| 82 | PathNet    | An R package for pathway analysis using topological information. PathNet uses topological information present in pathways and differential expression levels of genes (obtained from microarray experiment) to identify pathways that are 1) significantly enriched and 2) associated with each other in the context of differential expression. The algorithm is described in: PathNet: A tool for pathway analysis using topological information.                                                                                                                                                         |  | DifferentialExpression, MultipleComparisons, Pathways, Software                                                                                                                                | <a href="http://www.bioconductor.org/packages/release/bioc/html/PathNet.html">http://www.bioconductor.org/packages/release/bioc/html/PathNet.html</a>       |                                                                                     |  | Microarrays |
| 83 | pathRender | Render molecular pathways. build graphs from pathway databases, render them by Rgraphviz                                                                                                                                                                                                                                                                                                                                                                                                                                                                                                                    |  | GraphsAndNetworks, NetworkVisualization, Pathways, Software                                                                                                                                    | <a href="http://www.bioconductor.org/packages/release/bioc/html/pathRender.html">http://www.bioconductor.org/packages/release/bioc/html/pathRender.html</a> |                                                                                     |  | Microarrays |
| 84 | pathview   | a tool set for pathway based data integration and visualization. Pathview is a tool set for pathway based data integration and visualization. It maps and renders a wide variety of biological data on relevant pathway graphs. All users need is to supply their data and specify the target pathway. Pathview automatically downloads the pathway graph data, parses the data file, maps user data to the pathway, and render pathway graph with the mapped data. In addition, Pathview also seamlessly integrates with pathway and gene set analysis tools for large-scale and fully automated analysis. |  | Bioinformatics, DifferentialExpression, GeneExpression, GeneSetEnrichment, Genetics, GraphsAndNetworks, Metabolomics, Microarray, NetworkVisualization, Pathways, Proteomics, RNAseq, Software | <a href="http://www.bioconductor.org/packages/release/bioc/html/pathview.html">http://www.bioconductor.org/packages/release/bioc/html/pathview.html</a>     | Rgraphviz, graph, png, AnnotationDbi, methods, utils                                |  | Microarrays |

|    |               |                                                                                                                                                                                                                                                                                                                                                                                                                                                                                                                                                                                                                                                                                                                                                                                                                                                         |  |                                                                                                                                |                                                                                                                                                                   |                                                                                                                                                          |  |             |
|----|---------------|---------------------------------------------------------------------------------------------------------------------------------------------------------------------------------------------------------------------------------------------------------------------------------------------------------------------------------------------------------------------------------------------------------------------------------------------------------------------------------------------------------------------------------------------------------------------------------------------------------------------------------------------------------------------------------------------------------------------------------------------------------------------------------------------------------------------------------------------------------|--|--------------------------------------------------------------------------------------------------------------------------------|-------------------------------------------------------------------------------------------------------------------------------------------------------------------|----------------------------------------------------------------------------------------------------------------------------------------------------------|--|-------------|
| 85 | pcaGoPromoter | pcaGoPromoter is used to analyze DNA micro array data. This package contains functions to ease the analyses of DNA micro arrays. It utilizes principal component analysis as the initial multivariate analysis, followed by functional interpretation of the principal component dimensions with overrepresentation analysis for GO terms and regulatory interpretations using overrepresentation analysis of predicted transcription factor binding sites with the primo algorithm.                                                                                                                                                                                                                                                                                                                                                                    |  | GO, Gene Expression, Microarray, Software, Visualization                                                                       | <a href="http://www.bioconductor.org/packages/release/bioc/html/pcaGoPromoter.html">http://www.bioconductor.org/packages/release/bioc/html/pcaGoPromoter.html</a> | Biobase(>=2.10.0), AnnotationDbi                                                                                                                         |  | Microarrays |
| 86 | phenoTest     | Tools to test association between gene expression and phenotype in a way that is efficient, structured, fast and scalable. We also provide tools to do GSEA (Gene set enrichment analysis) and copy number variation. Tools to test correlation between gene expression and phenotype in a way that is efficient, structured, fast and scalable. GSEA is also provided.                                                                                                                                                                                                                                                                                                                                                                                                                                                                                 |  | Bioinformatics, Classification, Clustering, Differential Expression, Microarray, Multiple Comparisons, Software                | <a href="http://www.bioconductor.org/packages/release/bioc/html/phenoTest.html">http://www.bioconductor.org/packages/release/bioc/html/phenoTest.html</a>         | survival, limma, Hmisc, gplots, Category, AnnotationDbi, hopach, biomaRt, GSEABase, geneFilter, xtable, annotate, mgcv, SNPchip, hgu133a.db, HTSAnalyzer |  | Microarrays |
| 87 | piano         | Platform for integrative analysis of omics data. Piano performs gene set analysis using various statistical methods, from different gene level statistics and a wide range of gene-set collections. Furthermore, the Piano package contains functions for combining the results of multiple runs of gene set analyses.                                                                                                                                                                                                                                                                                                                                                                                                                                                                                                                                  |  | Data Import, Data Representation, Differential Expression, Microarray, Preprocessing, Quality Control, Software, Visualization | <a href="http://www.bioconductor.org/packages/release/bioc/html/piano.html">http://www.bioconductor.org/packages/release/bioc/html/piano.html</a>                 | Biobase, gplots, igraph, relations, marray                                                                                                               |  | Microarrays |
| 88 | predictionet  | Inference for predictive networks designed for (but not limited to) genomic data. This package contains a set of functions related to network inference combining genomic data and prior information extracted from biomedical literature and structured biological databases. The main function is able to generate networks using Bayesian or regression-based inference methods; while the former is limited to < 100 of variables, the latter may infer networks with hundreds of variables. Several statistics at the edge and node levels have been implemented (edge stability, predictive ability of each node, ...) in order to help the user to focus on high quality subnetworks. Ultimately, this package is used in the 'Predictive Networks' web application developed by the Dana-Farber Cancer Institute in collaboration with Entagen. |  | Graphs and Networks, Network Inference, Software                                                                               | <a href="http://www.bioconductor.org/packages/release/bioc/html/predictionet.html">http://www.bioconductor.org/packages/release/bioc/html/predictionet.html</a>   | penalized, RBGL, MASS                                                                                                                                    |  | Microarrays |

|    |            |                                                                                                                                                                                                                                                                                                                                                                                                                                                                                                                                                                                                                                                                                                                 |  |                                                                                                      |                                                                                                                                                             |                                                                                           |  |             |
|----|------------|-----------------------------------------------------------------------------------------------------------------------------------------------------------------------------------------------------------------------------------------------------------------------------------------------------------------------------------------------------------------------------------------------------------------------------------------------------------------------------------------------------------------------------------------------------------------------------------------------------------------------------------------------------------------------------------------------------------------|--|------------------------------------------------------------------------------------------------------|-------------------------------------------------------------------------------------------------------------------------------------------------------------|-------------------------------------------------------------------------------------------|--|-------------|
| 89 | puma       | Propagating Uncertainty in Microarray Analysis. Most analyses of Affymetrix GeneChip data are based on point estimates of expression levels and ignore the uncertainty of such estimates. By propagating uncertainty to downstream analyses we can improve results from microarray analyses. For the first time, the puma package makes a suite of uncertainty propagation methods available to a general audience. puma also offers improvements in terms of scope and speed of execution over previously available uncertainty propagation methods. Included are summarisation, differential expression detection, clustering and PCA methods, together with useful plotting and data manipulation functions. |  | Bioinformatics, Clustering, Differential Expression, Microarray, OneChannel, Preprocessing, Software | <a href="http://www.bioconductor.org/packages/release/bioc/html/puma.html">http://www.bioconductor.org/packages/release/bioc/html/puma.html</a>             | Biobase(>= 2.5.5), affy(>= 1.23.4), affyio                                                |  | Microarrays |
| 90 | rama       | Robust Analysis of MicroArrays. Robust estimation of cDNA microarray intensities with replicates. The package uses a Bayesian hierarchical model for the robust estimation. Outliers are modeled explicitly using a t-distribution, and the model also addresses classical issues such as design effects, normalization, transformation, and nonconstant variance.                                                                                                                                                                                                                                                                                                                                              |  | Microarray, Preprocessing, QualityControl, Software, TwoChannel                                      | <a href="http://www.bioconductor.org/packages/release/bioc/html/rama.html">http://www.bioconductor.org/packages/release/bioc/html/rama.html</a>             |                                                                                           |  | Microarrays |
| 91 | rbsurv     | Robust likelihood-based survival modeling with microarray data                                                                                                                                                                                                                                                                                                                                                                                                                                                                                                                                                                                                                                                  |  | Bioinformatics, Microarray, Software                                                                 | <a href="http://www.bioconductor.org/packages/release/bioc/html/rbsurv.html">http://www.bioconductor.org/packages/release/bioc/html/rbsurv.html</a>         |                                                                                           |  | Microarrays |
| 92 | ReactomePA | Reactome Pathway Analysis. This package provides functions for pathway analysis based on REACTOME pathway database. It will implement enrichment analysis, gene set enrichment analysis and functional modules detection.                                                                                                                                                                                                                                                                                                                                                                                                                                                                                       |  | Bioinformatics, Pathways, Software, Visualization                                                    | <a href="http://www.bioconductor.org/packages/release/bioc/html/ReactomePA.html">http://www.bioconductor.org/packages/release/bioc/html/ReactomePA.html</a> | methods, AnnotationDbi, reactome.db, org.Hs.eg.db, stats4, plyr, igraph, qvalue, graphics |  | Microarrays |
| 93 | Rmagpie    | MicroArray Gene-expression-based Program In Error rate estimation. Microarray Classification is designed for both biologists and statisticians. It offers the ability to train a classifier on a labelled microarray dataset and to then use that classifier to predict the class of new observations. A range of modern classifiers are available, including support vector machines (SVMs), nearest shrunken centroids (NSCs)... Advanced methods are provided to estimate the predictive error rate and to report the subset of genes which appear essential in discriminating between classes.                                                                                                              |  | Classification, Microarray, Software                                                                 | <a href="http://www.bioconductor.org/packages/release/bioc/html/Rmagpie.html">http://www.bioconductor.org/packages/release/bioc/html/Rmagpie.html</a>       | Biobase(>= 2.5.5), e1071, graphics, grDevices, kernlab, methods, pamr, stats, utils       |  | Microarrays |

|    |              |                                                                                                                                                                                                                                                                                                                                                                                                                                                                                                                                                                                                                                                                                                                                                                                                 |  |                                                                         |                                                                                                                                                                 |                                                                                                                                                                               |  |             |
|----|--------------|-------------------------------------------------------------------------------------------------------------------------------------------------------------------------------------------------------------------------------------------------------------------------------------------------------------------------------------------------------------------------------------------------------------------------------------------------------------------------------------------------------------------------------------------------------------------------------------------------------------------------------------------------------------------------------------------------------------------------------------------------------------------------------------------------|--|-------------------------------------------------------------------------|-----------------------------------------------------------------------------------------------------------------------------------------------------------------|-------------------------------------------------------------------------------------------------------------------------------------------------------------------------------|--|-------------|
| 94 | RmiR         | Package to work with miRNAs and miRNA targets with R. Useful functions to merge microRNA and respective targets using differents databases                                                                                                                                                                                                                                                                                                                                                                                                                                                                                                                                                                                                                                                      |  | GeneExpression, Microarray, Software, TimeCourse, Visualization         | <a href="http://www.bioconductor.org/packages/release/bioc/html/RmiR.html">http://www.bioconductor.org/packages/release/bioc/html/RmiR.html</a>                 | DBI, methods, stats                                                                                                                                                           |  | Microarrays |
| 95 | rttracklayer | R interface to genome browsers and their annotation tracks. Extensible framework for interacting with multiple genome browsers (currently UCSC built-in) and manipulating annotation tracks in various formats (currently GFF, BED, bedGraph, BED15, WIG, BigWig and 2bit built-in). The user may export/import tracks to/from the supported browsers, as well as query and modify the browser state, such as the current viewport.                                                                                                                                                                                                                                                                                                                                                             |  | Annotation, Data Import, Software, Visualization                        | <a href="http://www.bioconductor.org/packages/release/bioc/html/rttracklayer.html">http://www.bioconductor.org/packages/release/bioc/html/rttracklayer.html</a> | XML (>= 1.98-0), BiocGenerics (>= 0.1.0), IRanges (>= 1.15.37), GenomicRanges, Biostrings (>= 2.25.6), BSgenome (>= 1.23.1), zlibbioc, RCurl (>= 1.4-2), Rsamtools (>= 1.7.3) |  | Microarrays |
| 96 | segmentSeq   | Methods for identifying small RNA loci from high-throughput sequencing data. High-throughput sequencing technologies allow the production of large volumes of short sequences, which can be aligned to the genome to create a set of matches to the genome. By looking for regions of the genome which to which there are high densities of matches, we can infer a segmentation of the genome into regions of biological significance. The methods in this package allow the simultaneous segmentation of data from multiple samples, taking into account replicate data, in order to create a consensus segmentation. This has obvious applications in a number of classes of sequencing experiments, particularly in the discovery of small RNA loci and novel mRNA transcriptome discovery. |  | Bioinformatics, HighThroughputSequencing, MultipleComparisons, Software | <a href="http://www.bioconductor.org/packages/release/bioc/html/segmentSeq.html">http://www.bioconductor.org/packages/release/bioc/html/segmentSeq.html</a>     | baySeq, graphics, grDevices, IRanges, methods, utils, GenomicRanges                                                                                                           |  | Microarrays |
| 97 | SeqArray     | Big Data Management of Genome-wide Sequencing Variants. Big data management of genome-wide variants using the CoreArray library, where genotypic data and annotations are stored in an array-oriented manner, offering efficient access of genetic variants using the R language.                                                                                                                                                                                                                                                                                                                                                                                                                                                                                                               |  | Bioinformatics, Infrastructure, Software                                | <a href="http://www.bioconductor.org/packages/release/bioc/html/SeqArray.html">http://www.bioconductor.org/packages/release/bioc/html/SeqArray.html</a>         |                                                                                                                                                                               |  | Microarrays |

|     |            |                                                                                                                                                                                                                                                                                                                                                                                                                                                                                                                                |  |                                                                    |                                                                                                                                                             |                                                                               |  |             |
|-----|------------|--------------------------------------------------------------------------------------------------------------------------------------------------------------------------------------------------------------------------------------------------------------------------------------------------------------------------------------------------------------------------------------------------------------------------------------------------------------------------------------------------------------------------------|--|--------------------------------------------------------------------|-------------------------------------------------------------------------------------------------------------------------------------------------------------|-------------------------------------------------------------------------------|--|-------------|
| 98  | sigPathway | Pathway Analysis. Conducts pathway analysis by calculating the NT_k and NE_k statistics                                                                                                                                                                                                                                                                                                                                                                                                                                        |  | Bioinformatics,DifferentialExpression,MultipleComparisons,Software | <a href="http://www.bioconductor.org/packages/release/bioc/html/sigPathway.html">http://www.bioconductor.org/packages/release/bioc/html/sigPathway.html</a> |                                                                               |  | Microarrays |
| 99  | SIM        | Integrated Analysis on two human genomic datasets. Finds associations between two human genomic datasets.                                                                                                                                                                                                                                                                                                                                                                                                                      |  | Bioinformatics,Microarray,Software,Visualization                   | <a href="http://www.bioconductor.org/packages/release/bioc/html/SIM.html">http://www.bioconductor.org/packages/release/bioc/html/SIM.html</a>               | graphics,stats,globaltest,quantsmooth                                         |  | Microarrays |
| 100 | sizepower  | Sample Size and Power Calculation in Micorarray Studies. This package has been prepared to assist users in computing either a sample size or power value for a microarray experimental study. The user is referred to the cited references for technical background on the methodology underpinning these calculations. This package provides support for five types of sample size and power calculations. These five types can be adapted in various ways to encompass many of the standard designs encountered in practice. |  | Bioinformatics,Microarray,Software                                 | <a href="http://www.bioconductor.org/packages/release/bioc/html/sizepower.html">http://www.bioconductor.org/packages/release/bioc/html/sizepower.html</a>   |                                                                               |  | Microarrays |
| 101 | SLGI       | Synthetic Lethal Genetic Interaction. A variety of data files and functions for the analysis of genetic interactions                                                                                                                                                                                                                                                                                                                                                                                                           |  | Genetics,GraphsAndNetworks,NetworkAnalysis,Proteomics,Software     | <a href="http://www.bioconductor.org/packages/release/bioc/html/SLGI.html">http://www.bioconductor.org/packages/release/bioc/html/SLGI.html</a>             | AnnotationDbi,Biobase,GO.db,SciSI,graphics,lattice,methods,stats,BiocGenerics |  | Microarrays |
| 102 | SNAGEE     | Signal-to-Noise applied to Gene Expression Experiments. Signal-to-Noise applied to Gene Expression Experiments. Signal-to-noise ratios can be used as a proxy for quality of gene expression studies and samples. The SNRs can be calculated on any gene expression data set as long as gene IDs are available, no access to the raw data files is necessary. This allows to flag problematic studies and samples in any public data set.                                                                                      |  | Microarray,OneChannel,QualityControl,Software,TwoChannel           | <a href="http://www.bioconductor.org/packages/release/bioc/html/SNAGEE.html">http://www.bioconductor.org/packages/release/bioc/html/SNAGEE.html</a>         |                                                                               |  | Microarrays |



|     |                |                                                                                                                                                                                                                                                                                                                                                                                                                                                                                                                                                                                                                                                                                                                                                                                                                                                |  |                                                                                                                                                                       |                                                                                                                                                                     |                                                                                        |  |             |
|-----|----------------|------------------------------------------------------------------------------------------------------------------------------------------------------------------------------------------------------------------------------------------------------------------------------------------------------------------------------------------------------------------------------------------------------------------------------------------------------------------------------------------------------------------------------------------------------------------------------------------------------------------------------------------------------------------------------------------------------------------------------------------------------------------------------------------------------------------------------------------------|--|-----------------------------------------------------------------------------------------------------------------------------------------------------------------------|---------------------------------------------------------------------------------------------------------------------------------------------------------------------|----------------------------------------------------------------------------------------|--|-------------|
| 103 | snm            | Supervised Normalization of Microarrays. SNM is a modeling strategy especially designed for normalizing high-throughput genomic data. The underlying premise of our approach is that your data is a function of what we refer to as study-specific variables. These variables are either biological variables that represent the target of the statistical analysis, or adjustment variables that represent factors arising from the experimental or biological setting the data is drawn from. The SNM approach aims to simultaneously model all study-specific variables in order to more accurately characterize the biological or clinical variables of interest.                                                                                                                                                                          |  | DifferentialExpression,ExonArray,GeneExpression,Microarray,MultiChannel,MultipleComparisons,OneChannel,Preprocessing,QualityControl,Software,Transcription,TwoChannel | <a href="http://www.bioconductor.org/packages/release/bioc/html/snm.html">http://www.bioconductor.org/packages/release/bioc/html/snm.html</a>                       |                                                                                        |  | Microarrays |
| 104 | SomatiCA       | SomatiCA: identifying, characterizing, and quantifying somatic copy number aberrations from cancer genome sequencing. SomatiCA is a software suite that is capable of identifying, characterizing, and quantifying somatic CNAs from cancer genome sequencing. First, it uses read depths and lesser allele frequencies (LAF) from mapped short sequence reads to segment the genome and identify candidate CNAs. Second, SomatiCA estimates the admixture rate from the relative copy-number profile of tumor-normal pair by a Bayesian finite mixture model. Third, SomatiCA quantifies absolute somatic copy-number and subclonality for each genomic segment to guide its characterization. Results from SomatiCA can be further integrated with single nucleotide variations (SNVs) to get a better understanding of the tumor evolution. |  | Bioinformatics,CopyNumberVariants,Sequencing,Software                                                                                                                 | <a href="http://www.bioconductor.org/packages/release/bioc/html/SomatiCA.html">http://www.bioconductor.org/packages/release/bioc/html/SomatiCA.html</a>             | foreach,lars,sn,DNacopy,methods,rebmix,GenomicRanges,Iranges                           |  | Microarrays |
| 105 | SplicingGraphs | Create, manipulate, visualize splicing graphs, and assign RNA-seq reads to them. This package allows the user to create, manipulate, and visualize splicing graphs and their bubbles based on a gene model for a given organism. Additionally it allows the user to assign RNA-seq reads to the edges of a set of splicing graphs, and to summarize them in different ways.                                                                                                                                                                                                                                                                                                                                                                                                                                                                    |  | Annotation,DataRepresentation,GeneExpression,Genetics,RNAseq,Sequencing,Software,Visualization                                                                        | <a href="http://www.bioconductor.org/packages/release/bioc/html/SplicingGraphs.html">http://www.bioconductor.org/packages/release/bioc/html/SplicingGraphs.html</a> | methods,utils,igraph,BiocGenerics,IRanges,GenomicRanges,GenomicFeatures,graphRgraphviz |  | Microarrays |
| 106 | ssize          | Estimate Microarray Sample Size. Functions for computing and displaying sample size information for gene expression arrays.                                                                                                                                                                                                                                                                                                                                                                                                                                                                                                                                                                                                                                                                                                                    |  | Bioinformatics,DifferentialExpression,Microarray,Software                                                                                                             | <a href="http://www.bioconductor.org/packages/release/bioc/html/ssize.html">http://www.bioconductor.org/packages/release/bioc/html/ssize.html</a>                   |                                                                                        |  | Microarrays |

|     |           |                                                                                                                                                                                                                                                                                                                                                                                                                                                                                                                                                                                                                                                                                                                                                              |  |                                                                                   |                                                                                                                                                           |                                                     |  |             |
|-----|-----------|--------------------------------------------------------------------------------------------------------------------------------------------------------------------------------------------------------------------------------------------------------------------------------------------------------------------------------------------------------------------------------------------------------------------------------------------------------------------------------------------------------------------------------------------------------------------------------------------------------------------------------------------------------------------------------------------------------------------------------------------------------------|--|-----------------------------------------------------------------------------------|-----------------------------------------------------------------------------------------------------------------------------------------------------------|-----------------------------------------------------|--|-------------|
| 107 | stepNorm  | Stepwise normalization functions for cDNA microarrays                                                                                                                                                                                                                                                                                                                                                                                                                                                                                                                                                                                                                                                                                                        |  | Microarray,Preprocessing,Software,TwoChannel                                      | <a href="http://www.bioconductor.org/packages/release/bioc/html/stepNorm.html">http://www.bioconductor.org/packages/release/bioc/html/stepNorm.html</a>   | marray,MASS,methods,stats                           |  | Microarrays |
| 108 | topGO     | topGO: Enrichment analysis for Gene Ontology. topGO package provides tools for testing GO terms while accounting for the topology of the GO graph. Different test statistics and different methods for eliminating local similarities and dependencies between GO terms can be implemented and applied.                                                                                                                                                                                                                                                                                                                                                                                                                                                      |  | Bioinformatics,Microarray,Software,Visualization                                  | <a href="http://www.bioconductor.org/packages/release/bioc/html/topGO.html">http://www.bioconductor.org/packages/release/bioc/html/topGO.html</a>         | methods,graph,Biobase,SparseM,AnnotationDbi,lattice |  | Microarrays |
| 109 | triplex   | Search and visualize intramolecular triplex-forming sequences in DNA. This package provides functions for identification and visualization of potential intramolecular triplex patterns in DNA sequence. The main functionality is to detect the positions of subsequences capable of folding into an intramolecular triplex (H-DNA) in a much larger sequence. The potential H-DNA (triplexes) should be made of as many canonical nucleotide triplets as possible. The package includes visualization showing the exact base-pairing in 1D, 2D or 3D.                                                                                                                                                                                                      |  | GeneRegulation,SequenceMatching,Software                                          | <a href="http://www.bioconductor.org/packages/release/bioc/html/triplex.html">http://www.bioconductor.org/packages/release/bioc/html/triplex.html</a>     | methods,grid,Biostrings,GenomicRanges               |  | Microarrays |
| 110 | tspair    | Top Scoring Pairs for Microarray Classification. These functions calculate the pair of genes that show the maximum difference in ranking between two user specified groups. This top scoring pair maximizes the average of sensitivity and specificity over all rank based classifiers using a pair of genes in the data set. The advantage of classifying samples based on only the relative rank of a pair of genes is (a) the classifiers are much simpler and often more interpretable than more complicated classification schemes and (b) if arrays can be classified using only a pair of genes, PCR based tests could be used for classification of samples. See the references for the tspcalc() function for references regarding TSP classifiers. |  | Bioinformatics,Microarray,Software                                                | <a href="http://www.bioconductor.org/packages/release/bioc/html/tspair.html">http://www.bioconductor.org/packages/release/bioc/html/tspair.html</a>       |                                                     |  | Microarrays |
| 111 | TurboNorm | A fast scatterplot smoother suitable for microarray normalization. A fast scatterplot smoother based on B-splines with second-order difference penalty. Functions for microarray normalization of single-colour data i.e. Affymetrix/Illumina and two-colour data supplied as marray MarrayRaw-objects or limma RGList-objects are available.                                                                                                                                                                                                                                                                                                                                                                                                                |  | CpGIsland,DNA Methylation,Microarray,OneChannel,Preprocessing,Software,TwoChannel | <a href="http://www.bioconductor.org/packages/release/bioc/html/TurboNorm.html">http://www.bioconductor.org/packages/release/bioc/html/TurboNorm.html</a> | stats,grDevices,affy,lattice                        |  | Microarrays |

|     |              |                                                                                                                                                                                                                                                                                                                                                                                                                                                                                                                                                                                                                                                                                                                                                                                                        |  |                                                                                                  |                                                                                                                                                                 |                                                                                                                      |  |             |
|-----|--------------|--------------------------------------------------------------------------------------------------------------------------------------------------------------------------------------------------------------------------------------------------------------------------------------------------------------------------------------------------------------------------------------------------------------------------------------------------------------------------------------------------------------------------------------------------------------------------------------------------------------------------------------------------------------------------------------------------------------------------------------------------------------------------------------------------------|--|--------------------------------------------------------------------------------------------------|-----------------------------------------------------------------------------------------------------------------------------------------------------------------|----------------------------------------------------------------------------------------------------------------------|--|-------------|
| 112 | virtualArray | Build virtual array from different microarray platforms. This package permits the user to combine raw data of different microarray platforms into one virtual array. It consists of several functions that act subsequently in a semi-automatic way. Doing as much of the data combination and letting the user concentrate on analysing the resulting virtual array.                                                                                                                                                                                                                                                                                                                                                                                                                                  |  | Bioinformatics, DataImport, Microarray, MultipleComparisons, OneChannel, Preprocessing, Software | <a href="http://www.bioconductor.org/packages/release/bioc/html/virtualArray.html">http://www.bioconductor.org/packages/release/bioc/html/virtualArray.html</a> | affy, affyPLM, AnnotationDbi, Biobase, gcrma, GEOquery, graphics, methods, reshape2, stats, utils, tseries, outliers |  | Microarrays |
| 113 | vsn          | Variance stabilization and calibration for microarray data. The package implements a method for normalising microarray intensities, both between colours within array, and between arrays. The method uses a robust variant of the maximum-likelihood estimator for the stochastic model of microarray data described in the references (see vignette). The model incorporates data calibration (a.k.a. normalization), a model for the dependence of the variance on the mean intensity, and a variance stabilizing data transformation. Differences between transformed intensities are analogous to normalized log-ratios. However, in contrast to the latter, their variance is independent of the mean, and they are usually more sensitive and specific in detecting differential transcription. |  | Microarray, OneChannel, Preprocessing, Software, TwoChannel                                      | <a href="http://www.bioconductor.org/packages/release/bioc/html/vsn.html">http://www.bioconductor.org/packages/release/bioc/html/vsn.html</a>                   | methods, affy(>= 1.23.4), limma, lattice                                                                             |  | Microarrays |
| 114 | wateRmelon   | Illumina 450 methylation array normalization and metrics. 15 flavours of betas and three performance metrics, with methods for objects produced by methylumi, minfi and IMA packages.                                                                                                                                                                                                                                                                                                                                                                                                                                                                                                                                                                                                                  |  | DNAMethylation, Microarray, Preprocessing, QualityControl, Software, TwoChannel                  | <a href="http://www.bioconductor.org/packages/release/bioc/html/wateRmelon.html">http://www.bioconductor.org/packages/release/bioc/html/wateRmelon.html</a>     |                                                                                                                      |  | Microarrays |

|     |            |                                                                                                                                                                                                                                                                                                                                                                                                                                                                                                                                                                                                                                                                                                                                                                                                                                         |  |                                                                                                                                      |                                                                                                                                                             |         |  |             |
|-----|------------|-----------------------------------------------------------------------------------------------------------------------------------------------------------------------------------------------------------------------------------------------------------------------------------------------------------------------------------------------------------------------------------------------------------------------------------------------------------------------------------------------------------------------------------------------------------------------------------------------------------------------------------------------------------------------------------------------------------------------------------------------------------------------------------------------------------------------------------------|--|--------------------------------------------------------------------------------------------------------------------------------------|-------------------------------------------------------------------------------------------------------------------------------------------------------------|---------|--|-------------|
| 115 | VegaMC     | VegaMC: A Package Implementing a Variational Piecewise Smooth Model for Identification of Driver Chromosomal Imbalances in Cancer. This package enables the detection of driver chromosomal imbalances including loss of heterozygosity (LOH) from array comparative genomic hybridization (aCGH) data. VegaMC performs a joint segmentation of a dataset and uses a statistical framework to distinguish between driver and passenger mutation. VegaMC has been implemented so that it can be immediately integrated with the output produced by PennCNV tool. In addition, VegaMC produces in output two web pages that allows a rapid navigation between both the detected regions and the altered genes. In the web page that summarizes the altered genes, the link to the respective Ensembl gene web page is reported.           |  | Bioinformatics, CopyNumberVariants, Software, aCGH                                                                                   | <a href="http://www.bioconductor.org/packages/release/bioc/html/VegaMC.html">http://www.bioconductor.org/packages/release/bioc/html/VegaMC.html</a>         | methods |  | Microarrays |
| 116 | xps        | Processing and Analysis of Affymetrix Oligonucleotide Arrays including Exon Arrays, Whole Genome Arrays and Plate Arrays. The package handles pre-processing, normalization, filtering and analysis of Affymetrix GeneChip expression arrays, including exon arrays (Exon 1.0 ST: core, extended, full probesets), gene arrays (Gene 1.0 ST) and plate arrays on computers with 1 GB RAM only. It imports Affymetrix .CDF, .CLF, .PGF and .CEL as well as annotation files, and computes e.g. RMA, MAS5, FARMS, DFW, FIRMA, tRMA, MAS5-calls, DABG-calls, I/NI-calls. It is an R wrapper to XPS (eXpression Profiling System), which is based on ROOT, an object-oriented framework developed at CERN. Thus, the prior installation of ROOT is a prerequisite for the usage of this package, however, no knowledge of ROOT is required. |  | DataImport, DifferentialExpression, ExonArray, GeneExpression, Microarray, OneChannel, Preprocessing, Software, Transcription        | <a href="http://www.bioconductor.org/packages/release/bioc/html/xps.html">http://www.bioconductor.org/packages/release/bioc/html/xps.html</a>               |         |  | Microarrays |
| 117 | maigesPack | Functions to handle cDNA microarray data, including several methods of data analysis. This package uses functions of various other packages together with other functions in a coordinated way to handle and analyse cDNA microarray data                                                                                                                                                                                                                                                                                                                                                                                                                                                                                                                                                                                               |  | Classification, Clustering, ConnectTools, DifferentialExpression, GraphsAndNetworks, Microarray, Preprocessing, Software, TwoChannel | <a href="http://www.bioconductor.org/packages/release/bioc/html/maigesPack.html">http://www.bioconductor.org/packages/release/bioc/html/maigesPack.html</a> |         |  | Microarrays |

|     |        |                                                                                                                                                                                                                                                                                                                                                                                                                                                                                      |  |                                                                                                       |                                                                                                                                                     |                                     |  |             |
|-----|--------|--------------------------------------------------------------------------------------------------------------------------------------------------------------------------------------------------------------------------------------------------------------------------------------------------------------------------------------------------------------------------------------------------------------------------------------------------------------------------------------|--|-------------------------------------------------------------------------------------------------------|-----------------------------------------------------------------------------------------------------------------------------------------------------|-------------------------------------|--|-------------|
| 118 | MANOR  | CGH Micro-Array NORmalization. Importation, normalization, visualization, and quality control functions to correct identified sources of variability in array-CGH experiments.                                                                                                                                                                                                                                                                                                       |  | CopyNumberVariants,DataImport, Microarray,Preprocessing,QualityControl,Software,TwoChannel            | <a href="http://www.bioconductor.org/packages/release/bioc/html/MANOR.html">http://www.bioconductor.org/packages/release/bioc/html/MANOR.html</a>   | GLAD,graphics,grDevices,stats,utils |  | Microarrays |
| 119 | marray | Exploratory analysis for two-color spotted microarray data. Class definitions for two-color spotted microarray data. Functions for data input, diagnostic plots, normalization and quality checking.                                                                                                                                                                                                                                                                                 |  | Microarray,Preprocessing,Software,TwoChannel                                                          | <a href="http://www.bioconductor.org/packages/release/bioc/html/marray.html">http://www.bioconductor.org/packages/release/bioc/html/marray.html</a> |                                     |  | Microarrays |
| 120 | impute | impute: Imputation for microarray data                                                                                                                                                                                                                                                                                                                                                                                                                                               |  | Bioinformatics, Microarray, Software                                                                  | <a href="http://www.bioconductor.org/packages/release/bioc/html/impute.html">http://www.bioconductor.org/packages/release/bioc/html/impute.html</a> |                                     |  | Microarrays |
| 121 | iPAC   | Identification of Protein Amino acid Clustering. iPAC is a novel tool to identify somatic amino acid mutation clustering within proteins while taking into account protein structure.                                                                                                                                                                                                                                                                                                |  | Bioinformatics, BiologicalDomains, Clustering, Proteomics, Software                                   | <a href="http://www.bioconductor.org/packages/release/bioc/html/iPAC.html">http://www.bioconductor.org/packages/release/bioc/html/iPAC.html</a>     |                                     |  | Microarrays |
| 122 | isobar | Analysis and quantitation of isobarically tagged MSMS proteomics data. isobar provides methods for preprocessing, normalization, and report generation for the analysis of quantitative mass spectrometry proteomics data labeled with isobaric tags, such as iTRAQ and TMT.                                                                                                                                                                                                         |  | Bioinformatics, MassSpectrometry, MultipleComparisons, Proteomics, QualityControl, Software           | <a href="http://www.bioconductor.org/packages/release/bioc/html/isobar.html">http://www.bioconductor.org/packages/release/bioc/html/isobar.html</a> | distr                               |  | Microarrays |
| 123 | les    | Identifying Differential Effects in Tiling Microarray Data. The 'les' package estimates Loci of Enhanced Significance (LES) in tiling microarray data. These are regions of regulation such as found in differential transcription, ChIP-chip, or DNA modification analysis. The package provides a universal framework suitable for identifying differential effects in tiling microarray data sets, and is independent of the underlying statistics at the level of single probes. |  | Bioinformatics, ChIPchip, DNAMethylation, DifferentialExpression, Microarray, Software, Transcription | <a href="http://www.bioconductor.org/packages/release/bioc/html/les.html">http://www.bioconductor.org/packages/release/bioc/html/les.html</a>       | boot,gplots,RColorBrewer            |  | Microarrays |

|     |        |                                                                                                                                                                                                                                                                                                                                                                                                                                                                                                                                                                                                            |  |                                                                                                                                                                    |                                                                                                                                                     |       |  |             |
|-----|--------|------------------------------------------------------------------------------------------------------------------------------------------------------------------------------------------------------------------------------------------------------------------------------------------------------------------------------------------------------------------------------------------------------------------------------------------------------------------------------------------------------------------------------------------------------------------------------------------------------------|--|--------------------------------------------------------------------------------------------------------------------------------------------------------------------|-----------------------------------------------------------------------------------------------------------------------------------------------------|-------|--|-------------|
| 124 | limma  | Linear Models for Microarray Data. Data analysis, linear models and differential expression for microarray data.                                                                                                                                                                                                                                                                                                                                                                                                                                                                                           |  | Bioinformatics, DataImport, DifferentialExpression, Microarray, Multiple Comparisons, One Channel, Preprocessing, QualityControl, Software, TimeCourse, TwoChannel | <a href="http://www.bioconductor.org/packages/release/bioc/html/limma.html">http://www.bioconductor.org/packages/release/bioc/html/limma.html</a>   |       |  | Microarrays |
| 125 | LMGene | LMGene Software for Data Transformation and Identification of Differentially Expressed Genes in Gene Expression Arrays                                                                                                                                                                                                                                                                                                                                                                                                                                                                                     |  | Bioinformatics, DifferentialExpression, Microarray, Preprocessing, Software                                                                                        | <a href="http://www.bioconductor.org/packages/release/bioc/html/LMGene.html">http://www.bioconductor.org/packages/release/bioc/html/LMGene.html</a> |       |  | Microarrays |
| 126 | LPE    | Methods for analyzing microarray data using Local Pooled Error (LPE) method. This LPE library is used to do significance analysis of microarray data with small number of replicates. It uses resampling based FDR adjustment, and gives less conservative results than traditional 'BH' or 'BY' procedures. Data accepted is raw data in txt format from MAS4, MAS5 or dChip. Data can also be supplied after normalization. LPE library is primarily used for analyzing data between two conditions. To use it for paired data, see LPEP library. For using LPE in multiple conditions, use HEM library. |  | Bioinformatics, DifferentialExpression, Microarray, Software                                                                                                       | <a href="http://www.bioconductor.org/packages/release/bioc/html/LPE.html">http://www.bioconductor.org/packages/release/bioc/html/LPE.html</a>       | stats |  | Microarrays |

|     |            |                                                                                                                                                                                                                                                                                                                                                                                                                                                                                                                                                                                                             |  |                                                                                             |                                                                                                                                                             |                                                                                                                                                                                                              |  |             |
|-----|------------|-------------------------------------------------------------------------------------------------------------------------------------------------------------------------------------------------------------------------------------------------------------------------------------------------------------------------------------------------------------------------------------------------------------------------------------------------------------------------------------------------------------------------------------------------------------------------------------------------------------|--|---------------------------------------------------------------------------------------------|-------------------------------------------------------------------------------------------------------------------------------------------------------------|--------------------------------------------------------------------------------------------------------------------------------------------------------------------------------------------------------------|--|-------------|
| 127 | lumi       | BeadArray Specific Methods for Illumina Methylation and Expression Microarrays. The lumi package provides an integrated solution for the Illumina microarray data analysis. It includes functions of Illumina BeadStudio (GenomeStudio) data input, quality control, BeadArray-specific variance stabilization, normalization and gene annotation at the probe level. It also includes the functions of processing Illumina methylation microarrays, especially Illumina Infinium methylation microarrays.                                                                                                  |  | DNAMethylation, Microarray, OneChannel, Preprocessing, QualityControl, Software, TwoChannel | <a href="http://www.bioconductor.org/packages/release/bioc/html/lumi.html">http://www.bioconductor.org/packages/release/bioc/html/lumi.html</a>             | affy(>= 1.23.4), methylumi(>= 2.3.2), annotate, Biobase(>= 2.5.5), lattice, mgcv (>= 1.4-0), hrcde, nleqslv, KernSmooth, preprocessCore, RSQLite, DBI, AnnotationDbi, MASS, graphics, stats, stats4, methods |  | Microarrays |
| 128 | LVSmiRNA   | LVS normalization for Agilent miRNA data                                                                                                                                                                                                                                                                                                                                                                                                                                                                                                                                                                    |  | AgilentChip, Microarray, OneChannel, Preprocessing, Software                                | <a href="http://www.bioconductor.org/packages/release/bioc/html/LVSmiRNA.html">http://www.bioconductor.org/packages/release/bioc/html/LVSmiRNA.html</a>     | BiocGenerics, stats4                                                                                                                                                                                         |  | Microarrays |
| 129 | maanova    | Tools for analyzing Micro Array experiments. Analysis of N-dye Micro Array experiment using mixed model effect. Containing analysis of variance, permutation and bootstrap, cluster and consensus tree.                                                                                                                                                                                                                                                                                                                                                                                                     |  | Clustering, DifferentialExpression, Microarray, Software                                    | <a href="http://www.bioconductor.org/packages/release/bioc/html/maanova.html">http://www.bioconductor.org/packages/release/bioc/html/maanova.html</a>       | Biobase, graphics, grDevices, methods, stats, utils                                                                                                                                                          |  | Microarrays |
| 130 | macat      | MicroArray Chromosome Analysis Tool. This library contains functions to investigate links between differential gene expression and the chromosomal localization of the genes. MACAT is motivated by the common observation of phenomena involving large chromosomal regions in tumor cells. MACAT is the implementation of a statistical approach for identifying significantly differentially expressed chromosome regions. The functions have been tested on a publicly available data set about acute lymphoblastic leukemia (Yeoh et al. Cancer Cell 2002), which is provided in the library 'stjudem'. |  | DifferentialExpression, Microarray, Software, Visualization                                 | <a href="http://www.bioconductor.org/packages/release/bioc/html/macat.html">http://www.bioconductor.org/packages/release/bioc/html/macat.html</a>           |                                                                                                                                                                                                              |  | Microarrays |
| 131 | maCorrPlot | Visualize artificial correlation in microarray data. Graphically displays correlation in microarray data that is due to insufficient normalization                                                                                                                                                                                                                                                                                                                                                                                                                                                          |  | Microarray, Preprocessing, Software, Visualization                                          | <a href="http://www.bioconductor.org/packages/release/bioc/html/maCorrPlot.html">http://www.bioconductor.org/packages/release/bioc/html/maCorrPlot.html</a> | graphics, grDevices, lattice, stats                                                                                                                                                                          |  | Microarrays |

|     |                      |                                                                                                                                                                                                                                                                                                                                                                                                                                                                                                                                                                                                                                                                                                                                                                                                                                                                       |                          |                                                                       |                                                                                                                                                   |                                                                           |                                          |             |
|-----|----------------------|-----------------------------------------------------------------------------------------------------------------------------------------------------------------------------------------------------------------------------------------------------------------------------------------------------------------------------------------------------------------------------------------------------------------------------------------------------------------------------------------------------------------------------------------------------------------------------------------------------------------------------------------------------------------------------------------------------------------------------------------------------------------------------------------------------------------------------------------------------------------------|--------------------------|-----------------------------------------------------------------------|---------------------------------------------------------------------------------------------------------------------------------------------------|---------------------------------------------------------------------------|------------------------------------------|-------------|
| 132 | maDB                 | Microarray database and utility functions for microarray data analysis. maDB allows to create a simple microarray database to store microarray experiments and annotation data into it. Affymetrix GeneChip expression values as well as values from two color microarrays can be stored into the database. Whole experiments or subsets from a experiment (or also values for a subset of genes in a subset of microarrays) can be fetched back to R. Additionally maDB provides different utility functions for the microarray data analysis like functions to draw MA plots or volcano plots with the data points color coded according to the local point density or functions that allow a replicate handling of miroarrays.                                                                                                                                     |                          | Microarray,OneChannel,Software,TwoChannel,Visualization               | <a href="http://www.bioconductor.org/packages/release/bioc/html/maDB.html">http://www.bioconductor.org/packages/release/bioc/html/maDB.html</a>   |                                                                           |                                          | Microarrays |
| 133 | made4                | Multivariate analysis of microarray data using ADE4. Multivariate data analysis and graphical display of microarray data. Functions include between group analysis and coinertia analysis. It contains functions that require ADE4.                                                                                                                                                                                                                                                                                                                                                                                                                                                                                                                                                                                                                                   |                          | Bioinformatics,Classification,Clustering,MultipleComparisons,Software | <a href="http://www.bioconductor.org/packages/release/bioc/html/made4.html">http://www.bioconductor.org/packages/release/bioc/html/made4.html</a> |                                                                           |                                          | Microarrays |
| 134 | ALTER Reflective API | The service provides conversion of DNA and protein alignment sequences from biological research to express the same information in alternative notation and as input for a different analytical software package. Input and output formats supported include ALN, FASTA, GDE, MSF, NEXUS, PHYLIP, and PIR. Analytical packages supported include Clustal, Mafft, Tcoffee, Muscle, and Probcons. The service can also de-dupe results to remove multiple identical repetitions from results. API methods support description of input data files, including operating system, analytical software, and data formatting, along with the same parameters for desired output. Methods allow selection of conversion options such as treatment of duplicate and error results. The API returns data converted from the input data expressed for the desired output format. | science,biology,genetics |                                                                       | <a href="http://www.programmableweb.com/api/alter-reflective">http://www.programmableweb.com/api/alter-reflective</a>                             | DNA, protein alignment sequence, ALN, FASTA, GDE, MSF, NEXUS, PHYLIP, PIR | ALN, FASTA, GDE, MSF, NEXUS, PHYLIP, PIR | Microarrays |



|     |                                                   |                                                                                                                                                                                                                                                                                                                                                                                                                                                                                                                                                                                                                                                                                                                     |                                    |  |                                                                                                                                                         |                                                                                                                            |                                                                                                                                 |                    |
|-----|---------------------------------------------------|---------------------------------------------------------------------------------------------------------------------------------------------------------------------------------------------------------------------------------------------------------------------------------------------------------------------------------------------------------------------------------------------------------------------------------------------------------------------------------------------------------------------------------------------------------------------------------------------------------------------------------------------------------------------------------------------------------------------|------------------------------------|--|---------------------------------------------------------------------------------------------------------------------------------------------------------|----------------------------------------------------------------------------------------------------------------------------|---------------------------------------------------------------------------------------------------------------------------------|--------------------|
| 135 | BIOBASE<br>API                                    | BIOBASE is the leading provider of expert-curated biological databases, software and services for the life sciences. BIOBASE products are used to identify relations that aid in drug and biomarker discovery. BIOBASE helps researchers to identify connections by offering well-structured data, assembled by highly qualified subject-matter experts, organized in an accessible and easily searchable manner. This data is accessible via an API. The API uses RESTful calls and responses are formatted in XML.                                                                                                                                                                                                | biology,reference,science,research |  | <a href="http://www.programmableweb.com/api/biobase">http://www.programmableweb.com/api/biobase</a>                                                     | drug, biomarker discovery                                                                                                  | XML                                                                                                                             | Systems<br>Biology |
| 136 | BioCyc<br>API                                     | The service provides aggregated access to almost 2000 databases of organism genome data (formally, Pathway/Genome Databases or PGDBs). Each database describes the genetic makeup and metabolic pathways of one biological organism. The service helps to navigate data, with tools for visualization of data relationships and analysis, both of individual organism data and comparisons among organisms. API methods support description of individual genes, including proteins, pathways, enzymes, reactions, and products generated. In addition to metabolic pathways and other characteristics of individual genes, methods enable the service's genome browser and metabolic maps relating separate genes. | science,biology,research           |  | <a href="http://www.programmableweb.com/api/biocyc">http://www.programmableweb.com/api/biocyc</a>                                                       | genetic makeup, metabolic pathways, biological organism, genes, proteins, pathways, enzymes, reactions, products generated | navigate data, visualization of data relationship, analysis, comparison, metabolic pathways, genes, genome, metabolic maps, XML | Systems<br>Biology |
| 137 | BioDB<br>Hyperlink<br>Management<br>System<br>API | The service maintains and automatically updates a database of hyperlinks across major biology and life sciences databases. It defines stable identifiers linking to data IDs in major databases for gene and protein information. Its update function returns up-to-date URLs for accessing corresponding data across multiple databases. API methods support submission of an identifier in a particular input format and the desired output format. Methods return the correct identifier in the requested output system. Methods also allow retrieval of a listing of identifiers logged in the system.                                                                                                          | science,research,biology,genetics  |  | <a href="http://www.programmableweb.com/api/biodb-hyperlink-management-system">http://www.programmableweb.com/api/biodb-hyperlink-management-system</a> | gene, protein                                                                                                              | JSON,plain text                                                                                                                 | Systems<br>Biology |

|     |                                             |                                                                                                                                                                                                                                                                                                                                                                                                                                                                                                                                                                                                                                                                                                                    |                                    |  |                                                                                                                                                                 |                                           |                                                                                                                                           |                 |
|-----|---------------------------------------------|--------------------------------------------------------------------------------------------------------------------------------------------------------------------------------------------------------------------------------------------------------------------------------------------------------------------------------------------------------------------------------------------------------------------------------------------------------------------------------------------------------------------------------------------------------------------------------------------------------------------------------------------------------------------------------------------------------------------|------------------------------------|--|-----------------------------------------------------------------------------------------------------------------------------------------------------------------|-------------------------------------------|-------------------------------------------------------------------------------------------------------------------------------------------|-----------------|
| 138 | BiologicalNetworks API                      | BiologicalNetworks is a software platform for analyzing and querying biological pathways. It can also be used for the visualization of gene regulation and protein interaction networks, as well as metabolic and signaling pathways. The BiologicalNetworks API allows the functions of this platform to be incorporated into other software applications.                                                                                                                                                                                                                                                                                                                                                        | visualization, biology, science    |  | <a href="http://www.programmableweb.com/api/biologicalnetworks">http://www.programmableweb.com/api/biologicalnetworks</a>                                       | biological pathways                       | analyze biological pathways, gene visualization, protein interaction, metabolic pathways, signaling pathways, XML                         | Systems Biology |
| 139 | Brain Maps API                              | Brain Maps is an online, interactive brain atlas, including both primate and non-primate brains. Brain Maps provides scanned images of sub-micron resolution brain sections. These images are annotated and a database allows for querying and retrieval of data about brain structure and function. Complete brain atlases are available for certain species. The Brain Maps API is a multiresolution image viewer with customizable label overlays. It is a free service, available for any web site that is free to consumers.                                                                                                                                                                                  | biology, reference, science        |  | <a href="http://www.programmableweb.com/api/brain-maps">http://www.programmableweb.com/api/brain-maps</a>                                                       | brain                                     | brain scanned images, brain structure, brain functions                                                                                    | Imaging         |
| 140 | cBio Cancer Genomics Data Server (CGDS) API | The service provides direct access by applications to genetic and genomic data stored by the Memorial Sloan-Kettering Cancer Center. Applications can retrieve information about cancer studies and their genetic findings, genetic profiles and indicators for specific cancer types and gene structures, and similar highly detailed data. Datasets document more than 5000 tumor samples from 20 research studies. API methods support retrieval of cancer research studies, with detailed filtering by specific topics and findings. Methods also allow retrieval of genetic profiles and case lists reported in cancer research, extended mutation data, protein and antibody information, and clinical data. | science, biology, search, genetics |  | <a href="http://www.programmableweb.com/api/cbio-cancer-genomics-data-server-cgds">http://www.programmableweb.com/api/cbio-cancer-genomics-data-server-cgds</a> | genetic data, genomic data, cancer, tumor | cancer, genetic finding, genetic profile, gene structure, mutation data, protein, antibody information, clinical data, Tab-delimited text | Microarrays     |

|     |                                               |                                                                                                                                                                                                                                                                                                                                                                                                                                                                                                                                                                                                                                                                                                                                                                    |                                             |  |                                                                                                                                                                         |                                                   |                                                                                      |                 |
|-----|-----------------------------------------------|--------------------------------------------------------------------------------------------------------------------------------------------------------------------------------------------------------------------------------------------------------------------------------------------------------------------------------------------------------------------------------------------------------------------------------------------------------------------------------------------------------------------------------------------------------------------------------------------------------------------------------------------------------------------------------------------------------------------------------------------------------------------|---------------------------------------------|--|-------------------------------------------------------------------------------------------------------------------------------------------------------------------------|---------------------------------------------------|--------------------------------------------------------------------------------------|-----------------|
| 141 | ChEMBL API                                    | The service from the European Bioinformatics Institute (EBI) provides programmatic access to a database of biologically active small molecules with drug-like effects. Data available include 2-D structure diagrams, calculated properties, and indicators of biological activities. API methods support retrieval of lists of chemical compounds based on inputs in various formats, from the local database ID to standard chemistry designations. The API can also retrieve components or substructures and similar compounds for a submitted identifier. Methods can return bioactivity measures as part of descriptive data.                                                                                                                                 | science, medical, biology, research, search |  | <a href="http://www.programmableweb.com/api/chembl">http://www.programmableweb.com/api/chembl</a>                                                                       | molecules                                         | chemical compounds, bioactivity measures, XML, JSON                                  | Systems Biology |
| 142 | CIPF RENATO API                               | The service provides a RESTful interface to RENATO (REgulatory Network Analysis TOol) which provides network-based analysis to identify regulatory elements common to a list of genes. It is intended for interpretation and visualization of information about gene regulation by mapping genes submitted to the regulatory network and extracting connections. It also highlights over-representation of specific regulatory connections among genes in the list. API methods support submission of a list of genes with parameters to specify regulatory connections of interest. Methods generate data showing transcriptional and post-transcriptional regulatory connections and highlighting regulatory links common among genes within the specified list. | biology, science, genetics                  |  | <a href="http://www.programmableweb.com/api/cipf-renato">http://www.programmableweb.com/api/cipf-renato</a>                                                             | genes                                             | gene interpretation, gene visualization, transcriptional, post-transcriptional, Text | Systems Biology |
| 143 | COILS predict protein coiled-coil regions API | The service provides predictions of coiled-coil regions within a protein structure through application of an algorithm from Lupas et al. It assesses the probability that some part of a protein structure represents a coiled-coil formation by comparing flanking sequences with those of proteins established as exhibiting such formations. API methods support submission of a protein sequence to generate a processing job and begin processing. The API returns any elements within the sequence that match known exemplars of coiled-coil structures.                                                                                                                                                                                                     | science, biology, genetics                  |  | <a href="http://www.programmableweb.com/api/coils-predict-protein-coiled-coil-regions">http://www.programmableweb.com/api/coils-predict-protein-coiled-coil-regions</a> | protein, protein structure, coiled-coil formation | comparison flanking sequences, protein sequence, coiled-coil structure, XML          | Systems Biology |
| 144 | Conservation Scorer API                       | The Conservation Scorer API calculates how much Eukaryotic Linear Motif (ELM) matches vary in a set of homologous protein sequences. A console is given for data input, but the SOAP calls are also made available for those who wish to integrate the Conservation Scorer API into other applications.                                                                                                                                                                                                                                                                                                                                                                                                                                                            | biology, science                            |  | <a href="http://www.programmableweb.com/api/conservation-scorer">http://www.programmableweb.com/api/conservation-scorer</a>                                             | homologous protein sequences                      | eukaryotic linear motif, homologous protein sequence, XML                            | Systems Biology |

|     |                                                    |                                                                                                                                                                                                                                                                                                                                                                                                                                                                                                                                                                                                                                                                     |                                     |  |                                                                                                                                                                                 |                                          |                                                                                                                             |                 |
|-----|----------------------------------------------------|---------------------------------------------------------------------------------------------------------------------------------------------------------------------------------------------------------------------------------------------------------------------------------------------------------------------------------------------------------------------------------------------------------------------------------------------------------------------------------------------------------------------------------------------------------------------------------------------------------------------------------------------------------------------|-------------------------------------|--|---------------------------------------------------------------------------------------------------------------------------------------------------------------------------------|------------------------------------------|-----------------------------------------------------------------------------------------------------------------------------|-----------------|
| 145 | DAVID Bioinformatics API                           | The service provides tools for functional annotation to discover the implications for biological research of specific genes and genetic markers tracked by its database. Formally named Database for Annotation, Visualization and Integrated Discovery (DAVID), it logs descriptions of genetic combinations found by researchers to enhance understanding of likely biological effects and target research. API methods support retrieval of annotations listing biological functions for specified individual genes and gene clusters in both tabular and chart form. Methods also support review of full gene reports for wider-scale informatics applications. | science, medical, biology, research |  | <a href="http://www.progrmmableweb.com/api/david-bioinformatics">http://www.progrmmableweb.com/api/david-bioinformatics</a>                                                     | genes, genetic markers                   | visualization, annotation listing biological functions, individual genes, gene cluster, review full gene report, HTML, Text | Systems Biology |
| 146 | DIALIGN API                                        | DIALIGN is a program for aligning multiple protein or nucleic acid sequences. It constructs alignments by comparing entire segments of the sequences. This method can be used for both global and local alignment, but it is most successful when sequences share only local homologies. DIALIGN is available as a download, a web console, and a SOAP API.                                                                                                                                                                                                                                                                                                         | biology, science                    |  | <a href="http://www.progrmmableweb.com/api/dialign">http://www.progrmmableweb.com/api/dialign</a>                                                                               | protein, sequences with local homologies | protein alignment, nucleic acid sequences, XML                                                                              | Systems Biology |
| 147 | Divide-and-Conquer Multiple Sequence Alignment API | Divide-and-Conquer Multiple Sequence Alignment (DCA) is a program for producing fast, high quality, simultaneous multiple alignments of amino acid, RNA, or DNA sequences. The program is based on an algorithm that provides a heuristic approach to sum-of-pairs optimal alignment. DCA is available as a download, a web console, and a SOAP API.                                                                                                                                                                                                                                                                                                                | genetics, science, biology          |  | <a href="http://www.progrmmableweb.com/api/divide-and-conquer-multiple-sequence-alignment">http://www.progrmmableweb.com/api/divide-and-conquer-multiple-sequence-alignment</a> | RNA, DNA, amino acid                     | amino acid alignment, RNA sequences, DNA sequences, XML                                                                     | Systems Biology |

|     |                                     |                                                                                                                                                                                                                                                                                                                                                                                                                                                                                                                                                                                                                                                                                                                                                                                                                       |                                               |  |                                                                                                                                                       |                                                        |                                                                                                            |                 |
|-----|-------------------------------------|-----------------------------------------------------------------------------------------------------------------------------------------------------------------------------------------------------------------------------------------------------------------------------------------------------------------------------------------------------------------------------------------------------------------------------------------------------------------------------------------------------------------------------------------------------------------------------------------------------------------------------------------------------------------------------------------------------------------------------------------------------------------------------------------------------------------------|-----------------------------------------------|--|-------------------------------------------------------------------------------------------------------------------------------------------------------|--------------------------------------------------------|------------------------------------------------------------------------------------------------------------|-----------------|
| 148 | EnrichNet API                       | <p>The service provides analysis of expected functional associations between genes and proteins submitted as a list. It also generates cellular processes, pathways, and complexes associated with the listed genes and proteins. Analysis results provide statistical rating of the importance of overlapping functional characteristics between lists of genes or proteins. API methods support submission of one or more genes or proteins specified by standard protocols (ensembl, HGNC symbol, etc.) along with the database to provide functional characteristics for the analysis. For larger batch analysis, methods allow uploads of files with tab-delimited values specifying the genes/proteins and interactions to be analyzed.</p>                                                                     | science, research, biology                    |  | <a href="http://www.programmableweb.com/api/enrichnet">http://www.programmableweb.com/api/enrichnet</a>                                               | genes, proteins, gene interaction, protein interaction | gene and protein association, cellular processes, pathways complexes of genes and proteins, analysis, Text | Systems Biology |
| 149 | Epidemic Marketplace API            | <p>The service promotes collaboration among researchers in epidemiology by compiling data sets and related resources and making them available for reuse. The site was developed as part of a multidisciplinary European research effort to build tools for forecasting epidemic and public health events. Researchers can upload their own results and download data contributed by others. They can also browse and review background reports and related resources. API methods support search for specific data objects or for collections of data objects related to a topic. Methods provide retrieval of data objects discovered or construction of tree structures depicting the relationships of documented research. Methods also allow upload, updating, and deleting of a researcher's own data sets.</p> | science, medical, biology, research, deadpool |  | <a href="http://www.programmableweb.com/api/epidemic-marketplace">http://www.programmableweb.com/api/epidemic-marketplace</a>                         | data sets                                              | forecast epidemic events, relationship of documented research, XML                                         | Systems Biology |
| 150 | FastA protein similarity search API | <p>The service compares a protein sequence submitted with a request against a database of protein structures. It reports matches with known protein sequences, indicating genetic relationships between the sample under analysis and sequences already documented and supporting conclusions about the sample's biological heritage. API methods support submission of a protein sequence to trigger analysis based on the FastA algorithm along with the specific reference database for the comparison. The API returns matching sequences found in the selected database to allow further analysis of genetic relationships with known proteins structures.</p>                                                                                                                                                   | science, biology, genetics                    |  | <a href="http://www.programmableweb.com/api/fast-a-protein-similarity-search">http://www.programmableweb.com/api/fast-a-protein-similarity-search</a> | protein sequence, protein structure                    | protein sequences, genetic relationship, comparison protein sequences, protein structures, XML             | Microarrays     |

|     |                 |                                                                                                                                                                                                                                                                                                                                                                                                                                                                                                                                                                                                                                                                                                                                                                                                                                                                                                                        |                          |  |                                                                                                             |                                              |                                                                                                                       |             |
|-----|-----------------|------------------------------------------------------------------------------------------------------------------------------------------------------------------------------------------------------------------------------------------------------------------------------------------------------------------------------------------------------------------------------------------------------------------------------------------------------------------------------------------------------------------------------------------------------------------------------------------------------------------------------------------------------------------------------------------------------------------------------------------------------------------------------------------------------------------------------------------------------------------------------------------------------------------------|--------------------------|--|-------------------------------------------------------------------------------------------------------------|----------------------------------------------|-----------------------------------------------------------------------------------------------------------------------|-------------|
| 151 | GeneCoDis2 API  | The service provides analysis of genetic sequence data to identify those associated with biological features, known as annotations, that frequently appear together. It then ranks these sets of genes based on the statistical significance of the frequency of co-occurrence. The results indicate the strength of association between biological annotations and a research project's identified set of genes. API methods support analysis of statistical relationships between genetic sequences based on multiple repositories of data documenting statistical relationships. A request can specify the organism genome to be the focus of analysis along with the statistical algorithm and method to apply plus the gene sequence and set of biological annotations to consider. Results suggest statistical associations between those annotations within the specified sequences for the specified organism. | genetics,biology,science |  | <a href="http://www.programmableweb.com/api/genecodis2">http://www.programmableweb.com/api/genecodis2</a>   | genetic sequence, biological features, genes | identify set of genes, analysis of genetic sequences relationships, organism genomeXML                                | Microarrays |
| 152 | GeneProf API    | The service provides data to support genetic research. Its data analysis functions help with processing of genetic sequences in RNA-seq and ChIP-seq formats, and a database of previously processed experimental results provides points of comparison for newly collected datasets. These resources help researchers to evaluate expression and regulation of genes developed in their experimental work and in similar results from other studies. API methods support retrieval of a catalog of datasets already logged by the service along with search-based access to data for individual genes, experiments, datasets, or public samples. Methods allow selection of transcription factors and TFAS scores for a target gene or an experimental sample. The API gives access to genomic data files in BED or WIG format.                                                                                       | genetics,biology,science |  | <a href="http://www.programmableweb.com/api/geneprof">http://www.programmableweb.com/api/geneprof</a>       | genetic sequences, RNA-seq, ChIP-seq formats | evaluate expression of genes, evaluate regulation of genes, individual genes, genomic data, XML,JSON,plain text,RDATA | Microarrays |
| 153 | GlobPlotter API | GlobPlotter is a SOAP-based API that allows users to plot the tendency within a protein for order/globularity and disorder. The plots generated by the API can be useful for designing constructs corresponding to globular proteins as is needed for many biochemical studies, particularly structural biology.                                                                                                                                                                                                                                                                                                                                                                                                                                                                                                                                                                                                       | biology,science          |  | <a href="http://www.programmableweb.com/api/globplotter">http://www.programmableweb.com/api/globplotter</a> | protein                                      | protein order, protein disorder, design constructs of proteins, XML                                                   | Microarrays |

|     |                                                |                                                                                                                                                                                                                                                                                                                                                                                                                                                                                                                                                                                                                                |                                  |  |                                                                                                                                                                           |                                            |                                                                                                                                        |             |
|-----|------------------------------------------------|--------------------------------------------------------------------------------------------------------------------------------------------------------------------------------------------------------------------------------------------------------------------------------------------------------------------------------------------------------------------------------------------------------------------------------------------------------------------------------------------------------------------------------------------------------------------------------------------------------------------------------|----------------------------------|--|---------------------------------------------------------------------------------------------------------------------------------------------------------------------------|--------------------------------------------|----------------------------------------------------------------------------------------------------------------------------------------|-------------|
| 154 | GMOD API                                       | GMOD, short for Generic Model Organism Database, is a project based on creating and managing genome-scale biological databases. GMOD provides a set of open-source tools to accomplish this. One of the tools provided is the GMOD RESTful API for querying genes and terms in different biological databases, such as FlyBase. The API is currently in private beta.                                                                                                                                                                                                                                                          | reference,science,biology        |  | <a href="http://www.programmableweb.com/api/gmod">http://www.programmableweb.com/api/gmod</a>                                                                             | genome, biological data, genes             | create genome database, manage genome database, XML,JSON                                                                               | Microarrays |
| 155 | GOR protein secondary structure prediction API | This collection of three services -- GORI, GORIII, and GORIV -- provide predictions of secondary protein sequences using methods based on the information theory of Garnier, Osguthorpe, and Robson. It evaluates checks for 17 residues to determine scores for four possible conformation states, with correction for known decision constants. The highest score is taken to indicate the protein conformation. API methods support submission of a protein sequence from experimental data. The API returns predictions of secondary sequences associated with the input data based on estimates of conformational states. | science,biology,genetics         |  | <a href="http://www.programmableweb.com/api/gor-protein-secondary-structure-prediction">http://www.programmableweb.com/api/gor-protein-secondary-structure-prediction</a> | protein sequence                           | predictions of secondary protein sequences, XML                                                                                        | Microarrays |
| 156 | H-InvDB API                                    | The service provides access to the H-Invitational Database (H-InvDB) of human genes and genetic structure. The database documents research analyzing all human gene transcripts with annotations from the service provider describing genetic structures, observed variants, and highly detailed interactions of genetic sequences and processes. API methods support search against the database by individual gene identifier, keywords in description text, location on a particular chromosome or in relation to other genes, and more.                                                                                    | science,research,biology,medical |  | <a href="http://www.programmableweb.com/api/h-invdb">http://www.programmableweb.com/api/h-invdb</a>                                                                       | genes, genetic structure, gene transcripts | genes interactions, interactions of genetic sequences, interactions of genetic processes, gene identifier, location on chromosome, XML | Microarrays |

|     |                           |                                                                                                                                                                                                                                                                                                                                                                                                                                                                                                                                                                                                                                                                                                                                                                                                                |                                     |  |                                                                                                                                 |                                    |                                                                                                                 |                 |
|-----|---------------------------|----------------------------------------------------------------------------------------------------------------------------------------------------------------------------------------------------------------------------------------------------------------------------------------------------------------------------------------------------------------------------------------------------------------------------------------------------------------------------------------------------------------------------------------------------------------------------------------------------------------------------------------------------------------------------------------------------------------------------------------------------------------------------------------------------------------|-------------------------------------|--|---------------------------------------------------------------------------------------------------------------------------------|------------------------------------|-----------------------------------------------------------------------------------------------------------------|-----------------|
| 157 | INOH Pathway Database API | <p>The service, Integrating Network Objects with Hierarchies (INOH), provides access to a database of pathways among bio-molecules in several organisms, including humans, mice, and rats. The pathways recorded by the service define molecular connections that allow signal transduction in an organism. This information is documented largely in published articles, so the database is built by extracting knowledge from text to develop a machine-processable repository. API methods support retrieval of graphs defining nodes and arcs (or edges) connecting them, based on selected criteria. Results delivered include the nodes involved in a particular pathway and the connections between them, distinguished by event type, including controlled events, controlling events, and others.</p> | science, medical, biology, research |  | <a href="http://www.programmableweb.com/api/inoh-pathway-database">http://www.programmableweb.com/api/inoh-pathway-database</a> | bio-molecules pathways             | molecular connections, signal transduction, pathway, connections, XML                                           | Systems Biology |
| 158 | JasparDB API              | <p>The service provides access to a database of factor-binding profiles depicting genetic makeups and structures typical of species. It provides biological researchers with lookup access to matrices defining genetic relationships documented through research. API methods generate profiles of transcription factor binding sites in varying formats, including Position Frequency Matrices (PFM), Position Weight Matrices (PWM), and Information Content Matrices (ICM). Methods support retrieval of all matrices or of a specific matrix specified by system ID or name. The API also supports search among matrices described in the system by topic-specific tags applied.</p>                                                                                                                      | science, biology, genetics          |  | <a href="http://www.programmableweb.com/api/jaspardb">http://www.programmableweb.com/api/jaspardb</a>                           | genetic makeup, genetic structures | genetic relationships, position frequency matrices, position weight matrices, information content matrices, XML | Microarrays     |



|     |                       |                                                                                                                                                                                                                                                                                                                                                                                                                                                                                                                                                                                                                                                                                                                                                                                                                                             |                                  |  |                                                                                                                       |                                                               |                                                                                                                               |                 |
|-----|-----------------------|---------------------------------------------------------------------------------------------------------------------------------------------------------------------------------------------------------------------------------------------------------------------------------------------------------------------------------------------------------------------------------------------------------------------------------------------------------------------------------------------------------------------------------------------------------------------------------------------------------------------------------------------------------------------------------------------------------------------------------------------------------------------------------------------------------------------------------------------|----------------------------------|--|-----------------------------------------------------------------------------------------------------------------------|---------------------------------------------------------------|-------------------------------------------------------------------------------------------------------------------------------|-----------------|
| 159 | Madeline API          | The service provides analysis and formatting of data reflecting human genetic background for use in studies of genetic linkage and pedigree. It converts data about genetic markers for an individual to formats compatible with common software for linkage analysis. It also supports queries against genetic pedigree datasets to aid discovery of relationships and patterns. Visualization tools generate Postscript images for rapid review of large, complex datasets. The service is also available as installed software. API methods support submission of genetic marker data for analysis. Methods analyze the pedigree links represented in the data and format it for submission to common link analyzer packages. Methods also generate SVG images representing data and defining genetic links to recorded human pedigrees. | science,biology,genetics         |  | <a href="http://www.programmableweb.com/api/madeline">http://www.programmableweb.com/api/madeline</a>                 | genetic data, genetic markers                                 | genetic analysis, genetic formatting, genetic pedigree, discover relationships, patterns, visualization, generate images, XML | Microarrays     |
| 160 | MetNet API            | MetNet is software to visualize, explore, statistically analyze and model transcriptomics, proteomics and metabolomics data in the context of a growing metabolic and regulatory network map of Arabidopsis, Soybean, and other species. The MetNet API is a programming library that provides direct-access to our MetNetDB database. It allows software developers to interface with a central repository of pathway-related data. It offers flexible query and data-retrieval methods for Java- and R-based applications that import biological network knowledge.                                                                                                                                                                                                                                                                       | biology,database                 |  | <a href="http://www.programmableweb.com/api/metnet">http://www.programmableweb.com/api/metnet</a>                     | metabolic, pathway, transcriptomics, proteomics, metabolomics | visualize, explore analyse, model transcriptomics, proteomics, metabolomics                                                   | Microarrays     |
| 161 | MIMI/Metabolomics API | The service provides a data repository supporting analysis in systems biology of genetic and metabolomic effects and molecular interactions. Available data include the MIMI database of protein interaction characteristics, which gathers input from multiple databases and sources within the field of biology. The repository also draws on daily updates of PubMed resources and reports from biomedical research. This single point of access allows queries and analysis against multiple interrelated data sources. API methods support search by free text or by a specific gene identifier. Returned data can include known compounds, interactions, and reactions. Methods can also return a list of interactions discussed in biological literature, discovered via natural language processing.                                | science,medical,biology,research |  | <a href="http://www.programmableweb.com/api/mimimetabolomics">http://www.programmableweb.com/api/mimimetabolomics</a> | genetic, metabolic, molecular interactions, protein, gene     | genetic analysis, metabolic analysis, protein interactions, gene identifier, XML                                              | Systems Biology |

|     |                                          |                                                                                                                                                                                                                                                                                                                                                                                                                                                                                                                                                                                                                                                                           |                          |  |                                                                                                                                                           |                                                                                           |                                                                                                                                     |                 |
|-----|------------------------------------------|---------------------------------------------------------------------------------------------------------------------------------------------------------------------------------------------------------------------------------------------------------------------------------------------------------------------------------------------------------------------------------------------------------------------------------------------------------------------------------------------------------------------------------------------------------------------------------------------------------------------------------------------------------------------------|--------------------------|--|-----------------------------------------------------------------------------------------------------------------------------------------------------------|-------------------------------------------------------------------------------------------|-------------------------------------------------------------------------------------------------------------------------------------|-----------------|
| 162 | MitoMiner API                            | The service provides mitochondrial data for a range of organisms. It collects a number of interrelated datasets associated with genetic and protein structures, allowing single-source access to information about their expression in living organisms. It also maintains and provides ontologies for describing genes. API methods support flexible queries against the database for matches to protein names, UniProt keywords, gene names, or species. Methods give access to datasets covering mitochondrial proteomics, gene ontologies, and metabolic pathways. The API also gives access to records of associations of human disease with mitochondrial profiles. | science,research,biology |  | <a href="http://www.programmableweb.com/api/mitominer">http://www.programmableweb.com/api/mitominer</a>                                                   | genetic structures, protein structures, genes, metabolic pathways, mitochondrial profiles | mitochondrial data, protein names matches, gene names, species, mitochondrial proteomics, gene ontologies, metabolic pathways, JSON | Systems Biology |
| 163 | MultAlin API                             | The service detects multiple alignments of elements within protein sequences submitted. Comparison of sequences detected in multiple sources can reveal similarities that indicate shared genetic heritage, allowing researchers to infer common background. API methods support submission of a set of protein sequences in Pearson-Fasta format. The API returns alignments detected in the sequences by applying the ClustalW algorithm, allowing researchers to draw conclusions about common genetic origins represented by the sequences.                                                                                                                           | science,biology,genetics |  | <a href="http://www.programmableweb.com/api/multalin">http://www.programmableweb.com/api/multalin</a>                                                     | protein sequences                                                                         | comparison of protein sequences, XML                                                                                                | Microarrays     |
| 164 | NCBI Conserved Domain Database (CDD) API | The service provides access to a database of molecular protein building blocks that recur in different combinations as part of organisms' genetic makeup. The search function helps to uncover associations between chemical elements of genetic structures documented in disparate data sources. API methods support selection of databases to search and configuration of conserved domains, as defined by NCBI, to match. Methods allow selection of search modes from basic to advanced, with complex Boolean queries, and filtered results. Methods also allow specification of Entrez-based protein designations in search queries.                                 | science,biology,research |  | <a href="http://www.programmableweb.com/api/ncbi-conserved-domain-database-cdd">http://www.programmableweb.com/api/ncbi-conserved-domain-database-cdd</a> | molecular protein building blocks, genetic makeup                                         | chemical elements, genetic structures, protein designations, Text                                                                   | Microarrays     |

|     |                                                                            |                                                                                                                                                                                                                                                                                                                                                                                                                                                                                                                                                                                                                                                                      |                                    |  |                                                                                                                                                                                             |                                                                |                                                                    |                 |
|-----|----------------------------------------------------------------------------|----------------------------------------------------------------------------------------------------------------------------------------------------------------------------------------------------------------------------------------------------------------------------------------------------------------------------------------------------------------------------------------------------------------------------------------------------------------------------------------------------------------------------------------------------------------------------------------------------------------------------------------------------------------------|------------------------------------|--|---------------------------------------------------------------------------------------------------------------------------------------------------------------------------------------------|----------------------------------------------------------------|--------------------------------------------------------------------|-----------------|
| 165 | ncRNA<br>frnadb<br>API                                                     | The service provides search access to a database of functional RNA sequences. It is part of a web portal of bioinformatics tools supporting genetic research specific to functional RNA, it is a comprehensive listing of non-coding RNA sequences. International scientists maintain data for open access within the genetic research community. API methods support submission of a search query to retrieve matches in the database. Methods also support retrieving complete details of individual listings, with output available in several mapping and sequencing formats, in addition to XML.                                                                | science,biology,search,genetics    |  | <a href="http://www.progrmmableweb.com/api/ncrna-frnadb">http://www.progrmmableweb.com/api/ncrna-frnadb</a>                                                                                 | RNA sequences, genetic                                         | genetic research, RNA sequences, XML                               | Microarrays     |
| 166 | Pacific Biosciences<br>SMRT<br>Pipe API                                    | The service provides a collaborative platform for molecule sequencing within the life sciences. It provides information about a proprietary technology for sequencing, SMRT, along with data and analytical software to help process it. Tools for accessing and converting files allow manipulation of data resources for processing in different environments. API methods support management of sequencing data output, secondary data analysis, control of analysis protocols, and validation of sample sheets. Separate APIs support conversion of data files between different formats.                                                                        | science,chemistry,biology,research |  | <a href="http://www.progrmmableweb.com/api/pacific-biosciences-smrt-pipe">http://www.progrmmableweb.com/api/pacific-biosciences-smrt-pipe</a>                                               | molecule sequence                                              | sequencing, SMRT, data analysis, control, analysis protocols, JSON | Microarrays     |
| 167 | Pathway Commons<br>API                                                     | The API provides a convenient point of access to information about biological pathways involving a specified physical entity (e.g. protein or small molecule) collected from public pathway databases. It gives machine-readable access to the same information browsed and searched by biologists and downloaded by computational biologists in BioPAX format for global analysis. Users can also download and install the cPath software to create a local mirror. All data is freely available, under the license terms of each contributing database.                                                                                                            | medical,research,biology           |  | <a href="http://www.progrmmableweb.com/api/pathway-commons">http://www.progrmmableweb.com/api/pathway-commons</a>                                                                           | biological pathways, protein, small molecule, pathway          | protein, small molecule, biological pathways, XML                  | Systems Biology |
| 168 | PcProf<br>predict<br>physico-chemical<br>profiles<br>of<br>proteins<br>API | The service provides a profile of a submitted protein sequence, describing its characteristics in relation to a list of properties established for known structures. Characteristics described include hydrophilicity/hydrophobicity, flexibility, antigenicity according to two measures, accessibility, and transmembranous helices. The profiles generated predict the behavior to be expected of the sample genetic structure. API methods support submission of a protein structure detected in research results. The API returns measures of key physical and chemical properties known to be associated with such structures to form a profile of the sample. | science,biology,genetics           |  | <a href="http://www.progrmmableweb.com/api/pcprof-predict-physico-chemical-profiles-of-proteins">http://www.progrmmableweb.com/api/pcprof-predict-physico-chemical-profiles-of-proteins</a> | protein sequence, hydrophilicity, hydrophobicity, antigenicity | genetic structure, protein structure, chemical properties, XML     | Systems Biology |

|     |                                                     |                                                                                                                                                                                                                                                                                                                                                                                                                                                                                                                                                                                                                                                                                                                                |                                      |  |                                                                                                                                                                                   |                                                                    |                                                                                                           |                 |
|-----|-----------------------------------------------------|--------------------------------------------------------------------------------------------------------------------------------------------------------------------------------------------------------------------------------------------------------------------------------------------------------------------------------------------------------------------------------------------------------------------------------------------------------------------------------------------------------------------------------------------------------------------------------------------------------------------------------------------------------------------------------------------------------------------------------|--------------------------------------|--|-----------------------------------------------------------------------------------------------------------------------------------------------------------------------------------|--------------------------------------------------------------------|-----------------------------------------------------------------------------------------------------------|-----------------|
| 169 | PREDATOR protein secondary structure prediction API | The service predicts secondary protein structures by analyzing amino acid sequences submitted and detecting hydrogen-bonded residues within those structures. Potential for hydrogen bonds is associated with resulting secondary structures, providing a partial indicator that may be used in combination with outputs of other services. API methods support submission of amino acid sequences to generate a job request and begin processing. The API returns indicators of hydrogen-bonded residues detected within the input data for use in secondary structure prediction. Methods also allow for control of the service, including status monitoring and cancellation of current processing jobs.                    | science,biology,genetics             |  | <a href="http://www.progrmmableweb.com/api/predator-protein-secondary-structure-prediction">http://www.progrmmableweb.com/api/predator-protein-secondary-structure-prediction</a> | protein structures, amino acid sequences, hydrogen-bonded residues | protein structures, amino acid sequences, structure prediction, XML                                       | Systems Biology |
| 170 | Pseudoviewer API                                    | The service provides tools for creating visual representations of genetic structures involving RNA. It converts experimental data to depict secondary structures and pseudoknot structures. By providing a consistent, flexible toolset, it helps researchers overcome problems with variations in data structures and software incompatibilities. API methods support conversion of large data sets to visualize complex RNA secondary structures with pseudoknots. Methods accept data uploads for RNA sequences in bracketed or paired format along with specifications for the output image desired. The service then generates the requested image representing relationships between RNA components implied by the data. | science,biology,genetics             |  | <a href="http://www.progrmmableweb.com/api/pseudoviewer">http://www.progrmmableweb.com/api/pseudoviewer</a>                                                                       | genetic structures, RNA                                            | depict structures, pseudoknot structures, visualize RNA structures, RNA sequences, RNA relationships, XML | Microarrays     |
| 171 | RCSB Protein Data Bank API                          | The Protein Data Bank (PDB) archive is the single worldwide repository of information about the 3D structures of large biological molecules, including proteins and nucleic acids. It is managed by the Research Collaboratory for Structural Bioinformatics (RCSB). The RCSB PDB allows users to access data through one of two methods: Search services: to return a list of IDs (i.e. PDB IDs, chain IDs, ligand IDs), Fetch services: to return data given a ID. The API uses RESTful calls and responses are formatted in XML.                                                                                                                                                                                            | database,Protein,science,biology,pdb |  | <a href="http://www.progrmmableweb.com/api/rcsb-protein-data-bank">http://www.progrmmableweb.com/api/rcsb-protein-data-bank</a>                                                   | protein structures, biological molecules, proteins, nucleic acid   | protein structures, XML                                                                                   | Systems Biology |

|     |                 |                                                                                                                                                                                                                                                                                                                                                                                                                                                                                                                                                                                                                                                                                             |                          |  |                                                                                                             |                            |                                                                                                                |                 |
|-----|-----------------|---------------------------------------------------------------------------------------------------------------------------------------------------------------------------------------------------------------------------------------------------------------------------------------------------------------------------------------------------------------------------------------------------------------------------------------------------------------------------------------------------------------------------------------------------------------------------------------------------------------------------------------------------------------------------------------------|--------------------------|--|-------------------------------------------------------------------------------------------------------------|----------------------------|----------------------------------------------------------------------------------------------------------------|-----------------|
| 172 | Reputer API     | The Reputer API helps users discover and visualize repeats in whole genomes or chromosomes. Repeat types that can be searched for include forward(direct) matches, reverse matches, complement matches, and palindromic matches. Reputer's functions are freely offered in a limited capacity through its web console and SOAP API. Downloading the software requires an additional licensing agreement.                                                                                                                                                                                                                                                                                    | genetics,science,biology |  | <a href="http://www.programmableweb.com/api/reputer">http://www.programmableweb.com/api/reputer</a>         | genome, chromosome         | discover, visualize repeats in genomes, visualize chromosomes, matches of chromosomes, matches of genomes, XML | Systems Biology |
| 173 | Retrotector API | The service from the University of Uppsala in Sweden provides analysis of DNA sequence data to generate a viewable representation of genetic links represented. A Java-based viewer program is available to interpret analytical output and depict genetic structures for deeper investigation. API methods support submission of a DNA sequence data in FASTA format or as raw data (possibly including position numbers). Sequence size may range from 5 to 10,000 KB in length. Methods support queue management to remove or update analysis jobs along with status monitoring for either an entire queue or a single job. The API also provides for accessing analytical output files. | science,biology,genetics |  | <a href="http://www.programmableweb.com/api/retrotector">http://www.programmableweb.com/api/retrotector</a> | DNA sequence, FASTA format | genetic representation, genetic structures, XML                                                                | Microarrays     |
| 174 | RNAfold API     | RNAfold is an interface for RNA folding and sequence design. It can be used to calculate secondary structures of RNA sequences. RNAfold is available as a web console or as a SOAP API.                                                                                                                                                                                                                                                                                                                                                                                                                                                                                                     | biology,science,genetics |  | <a href="http://www.programmableweb.com/api/rnafold">http://www.programmableweb.com/api/rnafold</a>         | RNA sequences              | RNA folding, sequence design, RNA sequences, XML                                                               | Microarrays     |
| 175 | RNAforester API | RNAforester is a tool for comparing RNA secondary structures. It supports the computation of pairwise structures and the multiple alignment of structures. RNAforester is available as a web console or a SOAP API.                                                                                                                                                                                                                                                                                                                                                                                                                                                                         | biology,genetics,science |  | <a href="http://www.programmableweb.com/api/rnaforester">http://www.programmableweb.com/api/rnaforester</a> | RNA structures             | RNA structure alignment, compare RNA structures, XML                                                           | Microarrays     |

|     |                      |                                                                                                                                                                                                                                                                                                                                                                                                                                                                                                                                                                                                                                                                                                                                                                                                               |                          |  |                                                                                                                     |                                                          |                                                                        |             |
|-----|----------------------|---------------------------------------------------------------------------------------------------------------------------------------------------------------------------------------------------------------------------------------------------------------------------------------------------------------------------------------------------------------------------------------------------------------------------------------------------------------------------------------------------------------------------------------------------------------------------------------------------------------------------------------------------------------------------------------------------------------------------------------------------------------------------------------------------------------|--------------------------|--|---------------------------------------------------------------------------------------------------------------------|----------------------------------------------------------|------------------------------------------------------------------------|-------------|
| 176 | RNAshapes API        | Given an RNA sequence, RNAshapes can help determine its probable shape. RNAshapes computes a small set of representative structures of different shapes as well as accumulated shape probabilities. It also offers comparative predictions of consensus structures. RNAshapes is available as a web console, a downloadable program, and a SOAP API.                                                                                                                                                                                                                                                                                                                                                                                                                                                          | science,genetics,biology |  | <a href="http://www.programmableweb.com/api/rnashapes">http://www.programmableweb.com/api/rnashapes</a>             | RNA sequence                                             | RNA shape, predict consensus structures, XML                           | Microarrays |
| 177 | SignalP/SignalP4 API | The service provides predictions of genetic structures based on neural network algorithms and Markov statistical models. It analyzes data about the frequency of amino acid sequences for various organisms and generates likely existence and locations of signal peptide cleavage sites to be expected in their genetic structures. Organism groups covered include gram-positive and gram-negative prokaryotes as well as eukaryotes. The same provider maintains an alternative service, as well. API methods support submission of the amino acid sequence to be analyzed along with an organism type, preferred prediction method, and desired statistical prediction certainty threshold. Methods also support monitoring the service processing queue and retrieving the completed analytical result. | science,biology,genetics |  | <a href="http://www.programmableweb.com/api/signalpsignalp4">http://www.programmableweb.com/api/signalpsignalp4</a> | genetic structures, amino acid                           | genetic structures, amino acid sequences, XML                          | Microarrays |
| 178 | SIMPA96 API          | The service provides predictions of secondary protein and nucleic acid sequences implied by the presence of known primary sequences. Its analysis is based on the nearest neighbor methodology, which tests for homologous chromosomes and infers secondary structures associated with them. API methods support submission of a primary gene sequence and retrieval of predictive data describing associated secondary sequences. Methods also allow status checks to monitor processing under the API and cancellation of current analysis operations.                                                                                                                                                                                                                                                      | science,biology,genetics |  | <a href="http://www.programmableweb.com/api/simpa96">http://www.programmableweb.com/api/simpa96</a>                 | protein sequences, nucleic acid sequences, gene sequence | protein sequences, nucleic acid sequences, homologous chromosomes, XML | Microarrays |

|     |                                       |                                                                                                                                                                                                                                                                                                                                                                                                                                                                                                                                                                                                                                                                                                                                                                                                                                                          |                                        |  |                                                                                                                                                       |                                      |                                                                                                   |                 |
|-----|---------------------------------------|----------------------------------------------------------------------------------------------------------------------------------------------------------------------------------------------------------------------------------------------------------------------------------------------------------------------------------------------------------------------------------------------------------------------------------------------------------------------------------------------------------------------------------------------------------------------------------------------------------------------------------------------------------------------------------------------------------------------------------------------------------------------------------------------------------------------------------------------------------|----------------------------------------|--|-------------------------------------------------------------------------------------------------------------------------------------------------------|--------------------------------------|---------------------------------------------------------------------------------------------------|-----------------|
| 179 | SSearch protein similarity search API | The service compares a submitted protein sequence against a reference database with analysis of similarities to known sequences. The output helps to identify a sequence and establish its genetic relationships to established structures while also noting variations from known patterns. This analysis puts a sample in context of prior research and links it to existing genetic structures. API methods support submission of a protein sequence identified in research to initiate the comparison. The API identifies similar sequences from its reference database, which allows the researcher to understand links to established genetic structures represented in the data.                                                                                                                                                                  | science,biology,genetics               |  | <a href="http://www.programmableweb.com/api/search-protein-similarity-search">http://www.programmableweb.com/api/search-protein-similarity-search</a> | protein sequence, genetic structures | identify sequence, genetic relationships, variations from known patterns, genetic structures, XML | Microarrays     |
| 180 | VisANT API                            | The service provides visualization tools to represent networks and pathways within biological research. Available as a web service or installed software, it ingests data about organisms and species and creates images depicting links and relationships between them. Interactions within an active community drive development of the graphical tools to create effective depictions for researchers. API methods support defining characteristics of the nodes of a visualization, including the links between them that determine the graphic representation. Methods support lookup in species and organism records to help define node descriptions.                                                                                                                                                                                             | science,biology,visualization,graphics |  | <a href="http://www.programmableweb.com/api/visant">http://www.programmableweb.com/api/visant</a>                                                     | biological pathways                  | visualization pathways, creates images, CSV,XML                                                   | Systems Biology |
| 181 | WebScipio API                         | WebScipioTrack this APIThe service defines the gene structure implied by a protein sequence within a particular genome. It aides in research projects to define gene sequencing by analyzing a protein sequence and identifying the genes defined, with accommodation for sequencing errors and errors and ambiguously defined genes, even where complete genomes are not fully described. The service provides locations within the genome where the submitted protein sequence could appear, which indicates the genes corresponding to the sequence. API methods support submission of a protein sequence with data about its source within a particular genome. Methods return comprehensive identification of genes defined by the sequence and identifies available genetic profiles for species characterized by the submitted profile and genes. | science,research,biology,genetics      |  | <a href="http://www.programmableweb.com/api/webscipio">http://www.programmableweb.com/api/webscipio</a>                                               | protein sequence, genome, gene       | gene structure, gene sequencing, identify genes, genome location,genetic profiles, JSON           | Microarrays     |

|     |                       |                                                                                                                                                                                                                                                                                                                                                                                                                                                                                                                                                                                                                                                                                                                                                                                                                                                      |                                        |                                    |                                                                                                                         |                                       |                                                                                                                       |         |
|-----|-----------------------|------------------------------------------------------------------------------------------------------------------------------------------------------------------------------------------------------------------------------------------------------------------------------------------------------------------------------------------------------------------------------------------------------------------------------------------------------------------------------------------------------------------------------------------------------------------------------------------------------------------------------------------------------------------------------------------------------------------------------------------------------------------------------------------------------------------------------------------------------|----------------------------------------|------------------------------------|-------------------------------------------------------------------------------------------------------------------------|---------------------------------------|-----------------------------------------------------------------------------------------------------------------------|---------|
| 182 | Aetna CarePass API    | CarePass by Aetna is an online portal that allows users to access health data, provider data, medicine information, and more health information. The CarePass API allows developers to access and integrate the functionality and data from CarePass with other applications and to create new applications. Some example API methods include retrieving claim information, searching and retrieving FDA and drug information, and accessing medicine pricing.                                                                                                                                                                                                                                                                                                                                                                                       | medical,health,Insurance,drugs         |                                    | <a href="http://www.programmableweb.com/api/aetna-carepass">http://www.programmableweb.com/api/aetna-carepass</a>       |                                       | medicine information, health information, FDA drug information, JSON                                                  | Medical |
| 183 | AIDSinfo API          | AIDSinfo offers access to the latest, federally approved HIV/AIDS medical practice guidelines, information on HIV/AIDS treatment, clinical trials, and other HIV/AIDS-related research information for health care providers, researchers, people affected by HIV/AIDS, and the general public. The AIDSinfo API provides access to the AIDSinfo drug database fact sheets in XML format. The API returns information from both the professional and patient versions of the AIDSinfo drug database fact sheets based on input query strings. It uses RESTful calls and responses are formatted in XML.                                                                                                                                                                                                                                              | government, medical, health, reference |                                    | <a href="http://www.programmableweb.com/api/aidsinfo">http://www.programmableweb.com/api/aidsinfo</a>                   | HIV, AIDS, drug, XML                  | HIV, AIDS treatment information, drug info, XML                                                                       | Medical |
| 184 | Allen Brain Atlas API | The Allen Brain Atlas is a collection of public online resources integrating extensive gene expression and neuroanatomical data. It is especially rich in resources relating to human and mouse neuroscience, but also includes some resources on non-human primates. The Allen Brain Atlas API consists of a set of URLs that make most of the data behind the project available for download.                                                                                                                                                                                                                                                                                                                                                                                                                                                      | medical, science                       |                                    | <a href="http://www.programmableweb.com/api/allen-brain-atlas">http://www.programmableweb.com/api/allen-brain-atlas</a> | gene expression, neuroanatomical data | gene expression, neuroanatomical data, XML                                                                            | Medical |
| 185 | Beddit API            | The service provides monitoring of a user's sleep patterns. A bedside device detects physical conditions and activities, uploading data to the service for later access by the sleeper, health care providers, or personal trainers. Data tracked include raw ballistocardiography (BCG) signals, heart rate measurements and variability (HRV), minute-by-minute actigraphy, and classification of the subject as asleep or awake at the moment of data collection. hods support authorization of access to a user account, followed by retrieval of information about the user and the timeline data collected by the bedside monitor. Requests can specify particular date and time ranges to gather data recorded during those spans. In addition to BCG and HRV, returned data report on conditions in the room such as light and sound levels. |                                        | medical, health, monitoring, sleep | <a href="http://www.programmableweb.com/api/beddit">http://www.programmableweb.com/api/beddit</a>                       | physical conditions, activities       | sleep patterns, ballistocardiography signals, heart rate measurements, variability, minute-by-minute actigraphy, JSON | Medical |



|     |                        |                                                                                                                                                                                                                                                                                                                                                                                                                                                                                                                                                                                                                                                                                                                                                                 |                                                     |  |                                                                                                                           |                                                                |                                                                                                                     |         |
|-----|------------------------|-----------------------------------------------------------------------------------------------------------------------------------------------------------------------------------------------------------------------------------------------------------------------------------------------------------------------------------------------------------------------------------------------------------------------------------------------------------------------------------------------------------------------------------------------------------------------------------------------------------------------------------------------------------------------------------------------------------------------------------------------------------------|-----------------------------------------------------|--|---------------------------------------------------------------------------------------------------------------------------|----------------------------------------------------------------|---------------------------------------------------------------------------------------------------------------------|---------|
| 186 | Bililite API           | The service provides pediatric charting functions that convert data submitted to images for web display and other purposes. Data can be entered via interactive forms or submitted as URL parameters, and the service completes processing to generate the requested chart displaying the data. Available graphs include height, weight, body mass index, peak flows, and bilirubin levels. API methods accept requests specifying the chart type (bilirubin, height and weight, BMI, blood pressure, head circumference, or peak flows) and data from a sample of patients or an individual patient. The API generates an image URL to be incorporated into another web page or other application.                                                             | visualization, charts, health care, health, medical |  | <a href="http://www.programmableweb.com/api/bililite">http://www.programmableweb.com/api/bililite</a>                     | pediatric functions                                            | image, height graph, weight graph, body mass, peak flows, bilirubin levels, blood pressure, head circumference, PNG | Medical |
| 187 | bioNMF API             | The bioNMF API uses Non-negative Matrix Factorization (NMF) to analyze biomedical data. Users can choose from three variations of the algorithm; standard, divergence, and non-smooth NMF. This API can be used to find cluster genes and highly related samples, to determine the most suitable number of sample clusters in a given dataset, or just to perform an NMF. This API is accessible via SOAP protocols.                                                                                                                                                                                                                                                                                                                                            | science, bioinformatics, medical, analysis          |  | <a href="http://www.programmableweb.com/api/bionmf">http://www.programmableweb.com/api/bionmf</a>                         | non-negative matrix factorization, NMF, biomedical data        | cluster genes, NMF, XML                                                                                             | Medical |
| 188 | Biosemantics ACCCA API | The service provides annotations for patient records to consistently document concepts related to problems detected in clinical settings, treatments defined for medical problems, and tests for monitoring patient conditions. The service combines input from six separate annotation systems to generate aggregate results that may be recorded to patient charts or other records. A training mode allows users to acclimate to the service and generate reliable results. API methods support submission of plain text from clinical records and returns annotations identifying clinical concepts for additional analysis. Methods apply a simple voting algorithm to combine results of separate annotation schemes for the final aggregate annotations. | healthcare, health, medical                         |  | <a href="http://www.programmableweb.com/api/biosemantics-accca">http://www.programmableweb.com/api/biosemantics-accca</a> | patient records, clinical, patient conditions, clinical record | treatments, identify clinical concepts, analysis, XML                                                               | Medical |

|     |                           |                                                                                                                                                                                                                                                                                                                                                                                                                                  |                                                 |  |                                                                                                                                 |                                      |                                                                                            |         |
|-----|---------------------------|----------------------------------------------------------------------------------------------------------------------------------------------------------------------------------------------------------------------------------------------------------------------------------------------------------------------------------------------------------------------------------------------------------------------------------|-------------------------------------------------|--|---------------------------------------------------------------------------------------------------------------------------------|--------------------------------------|--------------------------------------------------------------------------------------------|---------|
| 189 | ChemBank API              | ChemBank is a database that stores information on hundreds of thousands of small molecules and on hundreds of biomedically relevant assays. The ChemBank API allows users to download all the project, assay, plate, and well measurement data within ChemBank. Substructure and similarity search services are also provided.                                                                                                   | chemistry, science, biology, medical, dead pool |  | <a href="http://www.programmableweb.com/api/chembank">http://www.programmableweb.com/api/chembank</a>                           | small molecules, biomedically assays | molecular structure, molecular matching, XML                                               | Medical |
| 190 | China Cancer Database API | The China Cancer Database is a repository for information about the incidence, mortality, prognosis, therapy, and prevention of cancer. It was established by the Chinese Ministry of Science and Technology to create a uniform and nationwide cancer database. Specific information can be retrieved using SOAP APIs. Documentation for the China Cancer Database is available in both Chinese and English.                    | china, cancer, medical                          |  | <a href="http://www.programmableweb.com/api/china-cancer-database">http://www.programmableweb.com/api/china-cancer-database</a> | cancer                               | cancer prognosis, cancer therapy, prevention of cancer, XML                                | Medical |
| 191 | Cigna Health API          | Cigna is a health services company that provides integrated health care and related plans as an insurance provider. The Cigna Health API allows the user to access real-time health data. The service allows users to access health data to better serve customers, create applications with personalized data, share test applications, and deploy applications to production. The API uses REST calls and returns XML or JSON. | medical, Data, health, merchant, realtime       |  | <a href="http://www.programmableweb.com/api/cigna-health">http://www.programmableweb.com/api/cigna-health</a>                   | health data                          | JSON, XML                                                                                  | Medical |
| 192 | cPath API                 | cPath is a database and software suite for storing, visualizing, and analyzing biological pathways.                                                                                                                                                                                                                                                                                                                              | database, bioinformatics, medical               |  | <a href="http://www.programmableweb.com/api/cpath">http://www.programmableweb.com/api/cpath</a>                                 | biological pathways                  | store biological pathways, visualize biological pathways, analyse biological pathways, XML | Medical |

|     |              |                                                                                                                                                                                                                                                                                                                                                                                                                                                                                                                                                                                                                                                                                            |                                      |  |                                                                                                       |                                                          |                                                                         |         |
|-----|--------------|--------------------------------------------------------------------------------------------------------------------------------------------------------------------------------------------------------------------------------------------------------------------------------------------------------------------------------------------------------------------------------------------------------------------------------------------------------------------------------------------------------------------------------------------------------------------------------------------------------------------------------------------------------------------------------------------|--------------------------------------|--|-------------------------------------------------------------------------------------------------------|----------------------------------------------------------|-------------------------------------------------------------------------|---------|
| 193 | DailyMed API | The U.S. Department of Health and Human Services (HHS), through the National Library of Medicine, provides users with access to current Structured Product Language (SPL) information about marketed drugs. The data provided by this service is the most recent provided to the FDA (such as FDA labels/package inserts), and also includes information about warnings and in-progress FDA product reviews. Users can query this RESTful service using a variety of parameters, including prescription or over the counter, human or animal drugs, drug name, drug imprint data, and National Drug Code (NDC). This free service returns data as XML or JSON based on user specification. | medical, health, drugs               |  | <a href="http://www.programmableweb.com/api/dailymed">http://www.programmableweb.com/api/dailymed</a> | drug                                                     | drug data, drug name, XML, JSON                                         | Medical |
| 194 | DGIdb API    | The Drug Gene Interaction Database (DGIdb) is a database of known and potential drug-gene interactions. The web interface allows users to search for drug-gene interactions by gene, search for genes by category, or browse categories of genes. The API allows users to search for interactions or to retrieve interaction types, drug types, interaction sources, source trust levels, gene categories, and related genes. Information on drug-gene interactions is collected from multiple resources, including DrugBank, TTD, and PharmGKB.                                                                                                                                           | genetics, medical, science, database |  | <a href="http://www.programmableweb.com/api/dgidb">http://www.programmableweb.com/api/dgidb</a>       | drug, gene                                               | drug-gene interaction, drug types, gene categories, related genes, JSON | Medical |
| 195 | dkCOIN API   | dkCOIN (NIDDK Consortium Interconnectivity Network) provides seamless public access to large pools of data relevant to the mission of NIDDK (National Institute of Diabetes and Digestive and Kidney Diseases). Available resources includes everything from raw genetic information to scholarly articles. The dkCOIN API allows users to search and access its collections and resources. With an account, users can upload and edit their own resources for public use.                                                                                                                                                                                                                 | science, medical                     |  | <a href="http://www.programmableweb.com/api/dkcoin">http://www.programmableweb.com/api/dkcoin</a>     | diabetes, digestive, kidney disease, genetic information | genetic information, XML                                                | Medical |
| 196 | Dossia API   | Dossia aggregates users' health information into one convenient and safe Web-based platform. From this platform, users can utilize their data and access personalized health tools. The Dossia API allows client applications to securely read and update a Dossia participant's health data. Developers can read and write medications, allergies, immunizations and other XML document types.                                                                                                                                                                                                                                                                                            | health                               |  | <a href="http://www.programmableweb.com/api/dossia">http://www.programmableweb.com/api/dossia</a>     | allergy, medications, immunization                       | allergy, medications, immunization, XML, JPG, PNG, PDF                  | Medical |

|     |                 |                                                                                                                                                                                                                                                                                                                                                                                                                                                                                                                                        |                               |  |                                                                                                             |                                                          |                                                                                                                                          |         |
|-----|-----------------|----------------------------------------------------------------------------------------------------------------------------------------------------------------------------------------------------------------------------------------------------------------------------------------------------------------------------------------------------------------------------------------------------------------------------------------------------------------------------------------------------------------------------------------|-------------------------------|--|-------------------------------------------------------------------------------------------------------------|----------------------------------------------------------|------------------------------------------------------------------------------------------------------------------------------------------|---------|
| 197 | Drugle API      | The service provides a semantic search engine for authoritative information on pharmacology and medical drugs free of provider bias. It provides a general reference tool for health-care providers, patients and families, researchers, and medical students. Health information systems can implement the service as a component of decision support technology. API methods support submission of search queries and retrieval of results. Integration demos illustrate incorporation of the service with health information sites. | medical,search,drugs          |  | <a href="http://www.programmableweb.com/api/drugle">http://www.programmableweb.com/api/drugle</a>           | medical drugs                                            | XML                                                                                                                                      | Medical |
| 198 | EBI API         | The EBI Web services let you access nucleic acid, protein sequence, and macromolecular structure data. Choose from about 35 EBI Web Services. The European Bioinformatics Institute (EBI) is part of the European Molecular Biology Laboratory (EMBL). The Web services offer DNA and protein sequences, text mining, structure comparisons, various BLASTs, transmembrane topology predictions, microarray searching, and more.                                                                                                       | medical,biinformatics,science |  | <a href="http://www.programmableweb.com/api/ebi">http://www.programmableweb.com/api/ebi</a>                 | nucleid acid, protein sequence, macromolecular structure | DNA sequence, protein sequences, text mining, structure comparison, BLAST, transmembrane topology predictions, microarray searching, XML | Medical |
| 199 | GeneCruiser API | GeneCruiser provides a single point of access to genomic information freely available from multiple public data sources. With GeneCruiser, users can find variations in genes or find the gene to which a variation is linked. Users can also convert genes to Affymetrix probe identifiers and use those identifiers to retrieve requested information. The GeneCruiser API allows users to access the GeneCruiser functionality from within their own applications.                                                                  | science,medical               |  | <a href="http://www.programmableweb.com/api/genecruiser">http://www.programmableweb.com/api/genecruiser</a> | genomic information                                      | gene variations, gene, convert genes to Affymetrix probe, XML                                                                            | Medical |

|     |                              |                                                                                                                                                                                                                                                                                                                                                                                                                                                                                                                                                                                                                                                                                                                                                                       |                              |  |                                                                                                                                       |                                                         |                                                                                                                             |         |
|-----|------------------------------|-----------------------------------------------------------------------------------------------------------------------------------------------------------------------------------------------------------------------------------------------------------------------------------------------------------------------------------------------------------------------------------------------------------------------------------------------------------------------------------------------------------------------------------------------------------------------------------------------------------------------------------------------------------------------------------------------------------------------------------------------------------------------|------------------------------|--|---------------------------------------------------------------------------------------------------------------------------------------|---------------------------------------------------------|-----------------------------------------------------------------------------------------------------------------------------|---------|
| 200 | Healthnotes API              | Healthnotes is a content source for consumer self-care wellness decisions. The Healthnote API consists of two services: the concept service and the element service. The concept service provides metadata on health and wellness concepts and exposes the relationships between concepts. The element service provides content in a contextual, highly-atomized form giving users a different perspective on the content. Ultimately, the API provides access to self-care decision support by condition, nutritional supplement, medicine, diet, and food.                                                                                                                                                                                                          | reference,health,medical     |  | <a href="http://www.programmableweb.com/api/healthnotes">http://www.programmableweb.com/api/healthnotes</a>                           | self-care, nutritional supplement, medicine, diet, food | self-care, nutritional supplement, medicine, diet, food                                                                     | Medical |
| 201 | HIPAA Space API              | Helps medical and health-care applications to support ICD-10 codes in incoming EDI files via lookup services. Includes lists like National Provider Identifier, Healthcare Procedure Coding System Code, National Drug Code, International Classification of Diseases, and others                                                                                                                                                                                                                                                                                                                                                                                                                                                                                     | medical,HIPAA,reference      |  | <a href="http://www.programmableweb.com/api/hipaaspace">http://www.programmableweb.com/api/hipaaspace</a>                             | medical care, drug, disease classification              | XML,JSON                                                                                                                    | Medical |
| 202 | HIV Drug Research Center API | The HIV Drug Research Center provides a pair of APIs for predicting the susceptibility of mutated HIV to a variety of drugs. One API predicts the susceptibility of mutations in HIV protease to amprenavir, atazanavir, indinavir, lopinavir, nelfinavir, ritonavir, and saquinavir. The other predicts the susceptibility of mutations in HIV reverse transcriptase to lamivudine, abacavir, zidovudine, stavudine, zalcitabine, didanosine, emtricitabine, and tenofovir. These APIs are available to users via REST and XMPP.                                                                                                                                                                                                                                     | medical,aids                 |  | <a href="http://www.programmableweb.com/api/hiv-drug-research-center">http://www.programmableweb.com/api/hiv-drug-research-center</a> | HIV, AIDS, drug                                         | predict HIV mutations, XML                                                                                                  | Medical |
| 203 | How are you API              | How are you? is a free service for NHS patients and healthcare professionals that provides a convenient way to host patient health records online. Patients can control the contents of these records as well as how much of that content is shared and with whom. How are you? also provides users with information about medical conditions in plain English with direct links to external reference sources. The How are you? API uses REST calls to enable users to retrieve, edit, and delete information on the medical conditions, medications, and allergies in a patient's record. The API also lets users add and retrieve measurements taken over time such as blood pressure, blood glucose level, caloric intake, height, weight, and physical exercise. | healthcare,health,medical,uk |  | <a href="http://www.programmableweb.com/api/how-are-you">http://www.programmableweb.com/api/how-are-you</a>                           | NHS, medical conditions                                 | medical conditions, allergies, blood pressure, blood glucose level, caloric intake, height, weight, physical exercise, JSON | Medical |

|     |                        |                                                                                                                                                                                                                                                                                                                                                                                                                                                                                                                                                                                              |                                    |  |                                                                                                                           |                                                                    |                                                           |         |
|-----|------------------------|----------------------------------------------------------------------------------------------------------------------------------------------------------------------------------------------------------------------------------------------------------------------------------------------------------------------------------------------------------------------------------------------------------------------------------------------------------------------------------------------------------------------------------------------------------------------------------------------|------------------------------------|--|---------------------------------------------------------------------------------------------------------------------------|--------------------------------------------------------------------|-----------------------------------------------------------|---------|
| 204 | Kegg API               | The increasing amount of genome sequence data is the basis for understanding life as a molecular system and for developing medical, pharmaceutical, and other practical applications. Since 1995 we have been developing knowledge-based methods for uncovering higher-order systemic behaviors of the cell and the organism from genomic and molecular information.                                                                                                                                                                                                                         | bioinformatics,Data,medical        |  | <a href="http://www.programmableweb.com/api/kegg">http://www.programmableweb.com/api/kegg</a>                             | genome sequence, molecular, medical                                | cell behavior, genomic information, molecular information | Medical |
| 205 | Lexicom p API          | Lexicomp is a provider of drug information and clinical content for the healthcare industry. Lexicomp offers an Internet based solution for providing clinicians this content. Information from the databases and modules in Lexicomp Online are made available via an XML API and can be used in third party applications. Full documentation is not publicly available.                                                                                                                                                                                                                    | reference,medical,drugs,health     |  | <a href="http://www.programmableweb.com/api/lexicomp">http://www.programmableweb.com/api/lexicomp</a>                     | drug, clinical                                                     | drug, clinical, XML                                       | Medical |
| 206 | lifeIMAGE API          | lifeIMAGE is a service for healthcare providers, doctors, patients, and hospitals to manage share diagnostic imaging records with each other. The lifeIMAGE API allows developers to access and integrate the functionality of lifeIMAGE with other applications and to create new applications. Some example API methods include accessing patient records, managing account information, and sharing patient records.                                                                                                                                                                      | medical,health                     |  | <a href="http://www.programmableweb.com/api/lifeimage">http://www.programmableweb.com/api/lifeimage</a>                   | patient records                                                    | diagnostic imaging records                                | Medical |
| 207 | ManageBGL Diabetes API | ManageBGL is an online diabetes management platform. ManageBGL allows users to upload blood sugar readings, insulin doses and carbohydrate intake from their meter, cell phone or web browser. Once uploaded to the cloud, the information is accessible over the internet and can be shared in real time with teachers, parents, healthcare providers and other care givers. The RESTful API allows users to pull information from ManageBGL directly into an excel spreadsheet, or view recent blood sugar highs and lows with a news reader. Default formats are XML, JSON, RSS and Atom. | diabetes,health,management,medical |  | <a href="http://www.programmableweb.com/api/managebgl-diabetes">http://www.programmableweb.com/api/managebgl-diabetes</a> | diabetes, blood sugar readings, insulin doses, carbohydrate intake | blood sugar highs, blood sugar lows, XML,JSON,RSS,Atom    | Medical |
| 208 | myHealthAccount API    | myHealthAccount is a patient centric medical record service from the Swedish company Infogosoft. Clinics can use myHealthAccount modules to send medical records and images to patients accounts and patients can use myHealthAccount to gather their medical records, vaccinations, and drug lists all in one place. The myHealthAccount REST API allows developers to write applications that access myHealthAccount services. API methods exist for folders, vaccines, and documents. Most responses are in JSON format. An API key is required.                                          | medical,health,records,sweden      |  | <a href="http://www.programmableweb.com/api/myhealthaccount">http://www.programmableweb.com/api/myhealthaccount</a>       | patient record, medical record                                     | medical records, images, vaccinations, drug list, JSON    | Medical |

|     |                                              |                                                                                                                                                                                                                                                                                                                                                                                                                                                                                                                                                                                                                                                                                                                                                                                                                                |                               |  |                                                                                                                                                                       |                          |                                                                                        |         |
|-----|----------------------------------------------|--------------------------------------------------------------------------------------------------------------------------------------------------------------------------------------------------------------------------------------------------------------------------------------------------------------------------------------------------------------------------------------------------------------------------------------------------------------------------------------------------------------------------------------------------------------------------------------------------------------------------------------------------------------------------------------------------------------------------------------------------------------------------------------------------------------------------------|-------------------------------|--|-----------------------------------------------------------------------------------------------------------------------------------------------------------------------|--------------------------|----------------------------------------------------------------------------------------|---------|
| 209 | National Cancer Institute caDSR API          | The National Cancer Institute (NCI), a sub agency of the National Institute of Health (NIH), offers the Cancer Data Standards Registry and Repository (caDSR) API to provide users with programmatic access to a database of Common Data Elements (CDE's) created by the NCI to manage biomedical data. The caDSR contains Unified Markup Language (UML) models representing information domains developed by collaborating research partners, and submitted to the database. The semantics of the data elements in these models are extracted and transformed into administered components of the database, while the resulting collection of related CDE's are classified as part of the model and made visible as a collection. This free API operates over REST and returns data via XML and HTML.                         | medical,cancer,Data,standards |  | <a href="http://www.programmableweb.com/api/national-cancer-institute-cadsr">http://www.programmableweb.com/api/national-cancer-institute-cadsr</a>                   | cancer, biomedical data  | cancer, biomedical data, XML,HTML                                                      | Medical |
| 210 | National Cancer Institute SEER API           | The Surveillance, Epidemiology and End Results (SEER) Program, a service of the National Cancer Institute, is a cancer statistics resource. Collected data includes information on the incidence, prevalence and survival from specific geographic areas within the U.S., as well as cancer mortality for the entire country. The SEER API is a RESTful service supporting various program datasets and algorithms, and is available to developers who wish to incorporate SEER resources into their own systems. Exposed resources include Collaborative Staging, the Hematopoietic and Lymphoid Neoplasm Database, NAACCR documentation, the Antineoplastic Drugs Database, and incidence site recode variables. The API returns JSON formatted responses, communicates over HTTPS, and requires a free account and API key. | medical,cancer,statistics     |  | <a href="http://www.programmableweb.com/api/national-cancer-institute-seer">http://www.programmableweb.com/api/national-cancer-institute-seer</a>                     | cancer, cancer mortality | antineoplastic drugs, hematopoietic, lymphoid neoplasm, JSON                           | Medical |
| 211 | National Drug File-Reference Terminology API | The National Drug File-Reference Terminology (NDF-RT), developed by the Veterans Health Administration, provides clinical information about medications, including therapeutic intent, mechanism of action, physiologic effect and drug-drug interactions. Developers can use the API to retrieve data from the NDF-RT. The API uses both REST and SOAP protocol and responses are formatted in XML and JSON.                                                                                                                                                                                                                                                                                                                                                                                                                  | government,reference,medical  |  | <a href="http://www.programmableweb.com/api/national-drug-file-reference-terminology">http://www.programmableweb.com/api/national-drug-file-reference-terminology</a> | medical, clinical        | clinical information, medications, therapeutic intent, drug-drug interaction, XML,JSON | Medical |

|     |                                                          |                                                                                                                                                                                                                                                                                                                                                                                                                                                                                                                                                                                                                                          |                                          |  |                                                                                                                                                                                               |                                   |                                                                       |         |
|-----|----------------------------------------------------------|------------------------------------------------------------------------------------------------------------------------------------------------------------------------------------------------------------------------------------------------------------------------------------------------------------------------------------------------------------------------------------------------------------------------------------------------------------------------------------------------------------------------------------------------------------------------------------------------------------------------------------------|------------------------------------------|--|-----------------------------------------------------------------------------------------------------------------------------------------------------------------------------------------------|-----------------------------------|-----------------------------------------------------------------------|---------|
| 212 | National Institute on Drug Abuse Drug Screening Tool API | In an effort to connect developers with the tools needed to host and share the Government's drug abuse research and prevention information, the National Institute on Drug Abuse hosts an API through which they expose their Drug Use Screening Tool. The Drug Use Screening Tool is an interactive multiple-choice quiz built to help clinicians identify risky substance use in their adult patients. The API supports GET calls to retrieve questions and results and POST calls to submit answers. The API will return JSONP formatted responses in plain text through HTTP.                                                        | screening, drugs, medical, quiz          |  | <a href="http://www.programmableweb.com/api/national-institute-on-drug-abuse-drug-screening-tool">http://www.programmableweb.com/api/national-institute-on-drug-abuse-drug-screening-tool</a> | drug, substance                   | drug screening, identify risky substance, drug substance, JSON, JSONP | Medical |
| 213 | National Library of Medicine ChemSpell API               | The National Library of Medicine (NLM) is the world's largest medical library. The Library collects materials and provides information and research services in all areas of biomedicine and health care. The ChemSpell Web Service API provides chemical name spell checking and chemical name synonym look-up. ChemSpell contains more than 1.3 million chemical names related to organic, inorganic, pharmaceutical, toxicological, and environmental health topics. Developers can use the API to write applications that connect remotely to the ChemSpell Web service. The API uses SOAP calls and responses are formatted in XML. | science, medical, reference              |  | <a href="http://www.programmableweb.com/api/national-library-of-medicine-chemspell">http://www.programmableweb.com/api/national-library-of-medicine-chemspell</a>                             | medical, biomedicine, health care | chemical name checking, chemical name synonym look-up, XML            | Medical |
| 214 | Open mHealth API                                         | Open mHealth is an open architecture software service that enables sharing of mobile health data from various and multiple data sources. The Open mHealth API allows developers to access and integrate the data and functionality of Open mHealth with other applications and to create new applications. Some example API methods include retrieving data from specified streams, posting data, and searching data.                                                                                                                                                                                                                    | opendata, health, mhealth, medical, Data |  | <a href="http://www.programmableweb.com/api/open-mhealth">http://www.programmableweb.com/api/open-mhealth</a>                                                                                 |                                   | JSON                                                                  | Medical |
| 215 | OpenTox API                                              | OpenTox is a framework that can be used in the creation of predictive toxicology applications. It can be integrated with other APIs to provide users with access to a variety of distributed toxicological resources including data, computer models, validation, and reporting. OpenTox is working to meet the requirements of the REACH legislation for providing alternatives to animal experiments for toxicity testing.                                                                                                                                                                                                             | medical, science, tools                  |  | <a href="http://www.programmableweb.com/api/opentox">http://www.programmableweb.com/api/opentox</a>                                                                                           | medical                           | toxicology application, XML, RDF                                      | Medical |



|     |                     |                                                                                                                                                                                                                                                                                                                                                                                                                                                                                                                                                                                           |                                   |  |                                                                                                                     |                                                                |                                                                                  |         |
|-----|---------------------|-------------------------------------------------------------------------------------------------------------------------------------------------------------------------------------------------------------------------------------------------------------------------------------------------------------------------------------------------------------------------------------------------------------------------------------------------------------------------------------------------------------------------------------------------------------------------------------------|-----------------------------------|--|---------------------------------------------------------------------------------------------------------------------|----------------------------------------------------------------|----------------------------------------------------------------------------------|---------|
| 216 | Pathway Commons API | The API provides a convenient point of access to information about biological pathways involving a specified physical entity (e.g. protein or small molecule) collected from public pathway databases. It gives machine-readable access to the same information browsed and searched by biologists and downloaded by computational biologists in BioPAX format for global analysis. Users can also download and install the cPath software to create a local mirror. All data is freely available, under the license terms of each contributing database.                                 | medical, research, biology        |  | <a href="http://www.programmableweb.com/api/pathway-commons">http://www.programmableweb.com/api/pathway-commons</a> | biological pathways, protein, small molecule                   | biological pathways, protein, small molecule; analysis, XML                      | Medical |
| 217 | PDBj API            | Use the Protein Data Bank Japan (PDBj) API to get protein sequence and structure data, useful in biotech research and other research. Protein Data Bank Japan maintains a repository of macromolecular structures and offers tools, in collaboration with the RCSB in the US and the MSD-EBI in the EU. PDBj is supported by JST-BIRD. The head of PDBj is a professor at Osaka University.                                                                                                                                                                                               | japan, bioinformatics, medical    |  | <a href="http://www.programmableweb.com/api/pdbj">http://www.programmableweb.com/api/pdbj</a>                       | protein sequence, protein structure, macromolecular structures | protein sequence, protein structure, macromolecular structures, Atom, OpenSearch | Medical |
| 218 | Pillbox API         | Pillbox enables rapid identification of unknown solid-dosage medications (tablets/capsules) based on physical characteristics and high-resolution images. Pillbox's data and search engine are also accessible through an API. The API provides access to the identification system, data, and medication images. Medications can be identified by physical characteristics (imprint, size, shape, etc.), as well as drug name (brand or generic), inactive ingredients, drug label author, and DEA schedule and returns XML-formatted data. Access to documentation requires a password. | reference, medical                |  | <a href="http://www.programmableweb.com/api/pillbox">http://www.programmableweb.com/api/pillbox</a>                 | drug, medication, tablet, capsules                             | medication images, drug name, inactive ingredients, XML                          | Medical |
| 219 | Promedas API        | Promedas provides a clinical expertise system to medical professionals. The Promedas API can be integrated into existing medical systems that contain a patient file database. Using this data, Promedus can provide a differential diagnosis based on the data contained in a patient's file. The API is currently in a developer beta. To access the API, contact Promedas.                                                                                                                                                                                                             | health, medical, diagnosis, tools |  | <a href="http://www.programmableweb.com/api/promedas">http://www.programmableweb.com/api/promedas</a>               | medical, patient file, data, diagnosis                         |                                                                                  | Medical |

|     |                            |                                                                                                                                                                                                                                                                                                                                                                                                                                                                                                                                                                                                                                                                                                                                                 |                                      |  |                                                                                                                                   |                                                   |                                                                              |         |
|-----|----------------------------|-------------------------------------------------------------------------------------------------------------------------------------------------------------------------------------------------------------------------------------------------------------------------------------------------------------------------------------------------------------------------------------------------------------------------------------------------------------------------------------------------------------------------------------------------------------------------------------------------------------------------------------------------------------------------------------------------------------------------------------------------|--------------------------------------|--|-----------------------------------------------------------------------------------------------------------------------------------|---------------------------------------------------|------------------------------------------------------------------------------|---------|
| 220 | RCSB Protein Data Bank API | The Protein Data Bank (PDB) archive is the single worldwide repository of information about the 3D structures of large biological molecules, including proteins and nucleic acids. It is managed by the Research Collaboratory for Structural Bioinformatics (RCSB). The RCSB PDB allows users to access data through one of two methods: Search services: to return a list of IDs (i.e. PDB IDs, chain IDs, ligand IDs), Fetch services: to return data given a ID. The API uses RESTful calls and responses are formatted in XML.                                                                                                                                                                                                             | database,Protein,science,biology,pdb |  | <a href="http://www.programmableweb.com/api/rcsb-protein-data-bank">http://www.programmableweb.com/api/rcsb-protein-data-bank</a> | protein, large biological molecules, nucleic acid | protein, nucleic acid, large biological molecules, XML                       | Medical |
| 221 | RxNorm API                 | RxNorm provides normalized names for clinical drugs and links its names to many of the drug vocabularies commonly used in pharmacy management and drug interaction software. There are two RxNorm APIs (SOAP/WSDL and RESTful) available to provide developers with functions for retrieving RxNorm data from the most current RxNorm data set. Data can be returned in XML or JSON.                                                                                                                                                                                                                                                                                                                                                            | science,reference,medical            |  | <a href="http://www.programmableweb.com/api/rxnorm">http://www.programmableweb.com/api/rxnorm</a>                                 | clinical drug                                     | clinical drugs, drug names, pharmacy, drug interaction, XML,JSON             | Medical |
| 222 | RxNorm Prescribable API    | The service provides listings for a subset of drugs available to be prescribed in the United States from the larger list of all prescription medications maintained by the provider's RxNorm service. Prescribable listings also include selected popular over-the-counter (OTC) medications that doctors frequently prescribe. The listing omits drugs available only in countries other than the U.S. and those usable only for veterinary purposes. API methods support retrieval of an updated list of drugs with correct names, ingredients, and system identifiers. Methods also support access to descriptive information, such as NDC and UNII codes, relationships to other drugs on the list, and rankings by prescription frequency. | health,prescription,medical          |  | <a href="http://www.programmableweb.com/api/rxnorm-prescribable">http://www.programmableweb.com/api/rxnorm-prescribable</a>       | drug, veterinary                                  | XML                                                                          | Medical |
| 223 | SciBite API                | SciBite is a drug discovery search engine that continuously scans the internet for new drug-related information. It helps users find new drugs and drug data by tracking the latest news, clinical trials, grants, and blogs relating to pharmaceutical and biotechnology developments. The SciBite API provides programmatic access to its drug discovery data so that other entities can make use of it, and so that informaticians can find new connections within the data.                                                                                                                                                                                                                                                                 | health,science,textmining,medical    |  | <a href="http://www.programmableweb.com/api/scibite">http://www.programmableweb.com/api/scibite</a>                               | drug                                              | drug-related information, drug discovery, drug data, XML,JSON,JSONP,RSS,Text | Medical |

|     |                         |                                                                                                                                                                                                                                                                                                                                                                                                                                                                                                                                                                                                                                                                                                                                                                                           |                                   |  |                                                                                                                             |                                                  |                                                   |         |
|-----|-------------------------|-------------------------------------------------------------------------------------------------------------------------------------------------------------------------------------------------------------------------------------------------------------------------------------------------------------------------------------------------------------------------------------------------------------------------------------------------------------------------------------------------------------------------------------------------------------------------------------------------------------------------------------------------------------------------------------------------------------------------------------------------------------------------------------------|-----------------------------------|--|-----------------------------------------------------------------------------------------------------------------------------|--------------------------------------------------|---------------------------------------------------|---------|
| 224 | SeqHound API            | SeqHound: biological sequence and structure database as a platform for bioinformatics research. SeqHound has been developed as an integrated biological sequence, taxonomy, annotation and 3-D structure database system. It provides a high-performance server platform for bioinformatics research in a locally-hosted environment.                                                                                                                                                                                                                                                                                                                                                                                                                                                     | bioinformatics, medical, database |  | <a href="http://www.programmableweb.com/api/seqhound">http://www.programmableweb.com/api/seqhound</a>                       | biological sequence                              | biological sequence, biological structure, XML    | Medical |
| 225 | Sierra Stanford HIV API | The service provides access to a database developed by Stanford's HIVdb project to detail resistance of human immunodeficiency virus to established drug treatment regimens. Data provide scores according to the Stanford HIV Drug Resistance Algorithm for 17 protease and RT inhibitor compounds approved by the U.S. Food and Drug Administration (FDA) as treatments for HIV. Data also provide comments to guide evaluations and applications to form judgments of likely levels of drug resistance. API methods support submission of nucleic acid sequences to retrieve algorithmic scores predicting resistance of the described virus strain to known HIV treatment drugs. An XSL transform template is available to render the XML web service results as human-readable HTML. | healthcare, health, medical       |  | <a href="http://www.programmableweb.com/api/sierra-stanford-hiv">http://www.programmableweb.com/api/sierra-stanford-hiv</a> | HIV drug, nucleic acid sequences                 | HIV drug treatment, XML                           | Medical |
| 226 | SLAP API                | SLAP is a drug target prediction service provided by the Cheminformatics group at the School of Informatics and Computing at Indiana University. The RESTful SLAP APIs enable users to perform drug target predictions against hundreds of proteins, to find drug similarities based on polypharmacology profiles, and to find drugs similar to an input drug.                                                                                                                                                                                                                                                                                                                                                                                                                            | medical, science, prediction      |  | <a href="http://www.programmableweb.com/api/slap">http://www.programmableweb.com/api/slap</a>                               | drug, protein                                    | drug similarity                                   | Medical |
| 227 | STEPstools API          | The service provides information about prescription medication suitable for pediatric patients based on diagnosis, age, body size, and other relevant conditions. Its knowledge base covers a full range of illnesses and prescription medicines used to treat them, including rounding of dosages and adjustment of formulations appropriate for small children. API methods support search across the knowledge base by illness or health condition, medication, and patient characteristics. Methods return a ranked list of recommended formulations and doses for matching medications, with allowance for patient age and body weight. These recommendations are scored. Rankings reflect recommendation scores determined by the medication matching algorithm.                    | medical, health                   |  | <a href="http://www.programmableweb.com/api/stepstools">http://www.programmableweb.com/api/stepstools</a>                   | pediatric patient, diagnosis, medicines, illness | medication matching, patient characteristics, XML | Medical |

|     |                             |                                                                                                                                                                                                                                                                                                                                                                                                                                                                                                                                                                                                                                                                                                                |                                  |  |                                                                                                                               |                                                                                                                                   |                                                                            |         |
|-----|-----------------------------|----------------------------------------------------------------------------------------------------------------------------------------------------------------------------------------------------------------------------------------------------------------------------------------------------------------------------------------------------------------------------------------------------------------------------------------------------------------------------------------------------------------------------------------------------------------------------------------------------------------------------------------------------------------------------------------------------------------|----------------------------------|--|-------------------------------------------------------------------------------------------------------------------------------|-----------------------------------------------------------------------------------------------------------------------------------|----------------------------------------------------------------------------|---------|
| 228 | The Cancer Genome Atlas API | The Cancer Genome Atlas (TCGA) is a project to improve the understanding of the molecular basis of cancer through the application of genome analysis technologies, including large-scale genome sequencing. TCGA offers a collection of APIs that provide REST-based, programmatic access to its information resources. Available information includes annotations, data matrices, data reports, project metadata, and biospecimen metadata.                                                                                                                                                                                                                                                                   | medical,cancer                   |  | <a href="http://www.progrableweb.com/api/the-cancer-genome-atlas">http://www.progrableweb.com/api/the-cancer-genome-atlas</a> | cancer genome, genome analysis, genome sequence                                                                                   | data matrices, project metadata, biospecimen metadata, annotationsXML,JSON | Medical |
| 229 | Trackburn FoodData API      | The service provides a database of nutritional information for common food products. Information includes nutritional component values such as calories, fat percentage, and carbohydrate grams for a large selection of generic and brand name food products and popular restaurant offerings. More detailed nutritional content includes sugar, fiber, calcium, iron, many vitamins, and related specifications. API methods support retrieval of nutritional information, either simple or detailed, for a generic product type or a name brand product available in the market. Methods also can return nutritional components by serving size.                                                            | medical,health,fitness,food,diet |  | <a href="http://www.progrableweb.com/api/trackburn-fooddata">http://www.progrableweb.com/api/trackburn-fooddata</a>           | nutricion, food, calories, fat ercentage, carbohydrate grams, generic food, sugar, fiber, calcium, iron, vitamins, specifications | nutritional information, generic product type, brand name, XML             | Medical |
| 230 | UniProt API                 | UniProt is a protein sequence and annotation database for the scientific community. The UniProt API offers RESTful access to all its resources and services.                                                                                                                                                                                                                                                                                                                                                                                                                                                                                                                                                   | medical,bioinformatics           |  | <a href="http://www.progrableweb.com/api/uniprot">http://www.progrableweb.com/api/uniprot</a>                                 | protein sequence                                                                                                                  | HTML,TEXT,GFF,XML,RDF,RSS                                                  | Medical |
| 231 | VIOLIN API                  | The Vaccine Investigation and Online Information Network (VIOLIN) is a central online resource for vaccine literature, vaccine research data, and data analyses for vaccines and vaccine candidates. It focuses on vaccines developed against pathogens considered to be of high priority in public health and biological safety. It's database includes research from studies using laboratory animals as well as humans. VIOLIN also provides a new program for vaccine target prediction. VIOLIN provides a set of programming utilities for accessing its database. Users may employ either SOAP or REST calls to retrieve entries on a specified pathogen or vaccine. All data is returned in XML format. | medical,Vaccination              |  | <a href="http://www.progrableweb.com/api/violin">http://www.progrableweb.com/api/violin</a>                                   | vaccine, data analysis for vaccines, pathogens                                                                                    | vaccine prediction, pathogen, vaccineXML                                   | Medical |

|     |                                              |                                                                                                                                                                                                                                                                                                                                                                                                                                                                                                                                        |  |                                                                                                                                                             |                                                                                                           |                                               |                                                                                                                                                   |                              |
|-----|----------------------------------------------|----------------------------------------------------------------------------------------------------------------------------------------------------------------------------------------------------------------------------------------------------------------------------------------------------------------------------------------------------------------------------------------------------------------------------------------------------------------------------------------------------------------------------------------|--|-------------------------------------------------------------------------------------------------------------------------------------------------------------|-----------------------------------------------------------------------------------------------------------|-----------------------------------------------|---------------------------------------------------------------------------------------------------------------------------------------------------|------------------------------|
| 232 | Pathways and Gene annotations for QTL region | This workflow searches for genes which reside in a QTL (Quantitative Trait Loci) region in the mouse, <i>Mus musculus</i> . The workflow requires an input of: a chromosome name or number; a QTL start base pair position; QTL end base pair position. Data is then extracted from BioMart to annotate each of the genes found in this region. The Entrez and UniProt identifiers are then sent to KEGG to obtain KEGG gene identifiers. The KEGG gene identifiers are then used to search for pathways in the KEGG pathway database. |  | adasd,chromosome,data-driven,disease,ensembl,entrez,genes,genotype,kegg,mouse,nbc onworkflows,pathway-driven,pathways,phenotype,qt,shim,subworkflow,uniprot | <a href="http://www.myexperiment.org/workflows/16.html">http://www.myexperiment.org/workflows/16.html</a> | chromosome name ,start position ,end position | merged pathways ,gene descriptions ,pathway descriptions ,kegg pathway release ,report ,kegg external gene reference ,pathway ids ,genes pathways | Microarrays, Systems Biology |
|-----|----------------------------------------------|----------------------------------------------------------------------------------------------------------------------------------------------------------------------------------------------------------------------------------------------------------------------------------------------------------------------------------------------------------------------------------------------------------------------------------------------------------------------------------------------------------------------------------------|--|-------------------------------------------------------------------------------------------------------------------------------------------------------------|-----------------------------------------------------------------------------------------------------------|-----------------------------------------------|---------------------------------------------------------------------------------------------------------------------------------------------------|------------------------------|

|     |                                                                |                                                                                                                                                                                                                                                                                                                                                                                                                                                                                                                                                                                                                                                                                                                                                                                                                                                                                                                                                                                                                                                                                                                                                                                                                                                                                                                                                                                                                                                                                                                                                                                                                                                                                                                                                                                                                                                                                                                                                                                                                                        |  |                                                                                                          |                                                                                                           |                                                                                                          |                                                                                                                                                                                                                      |                                    |
|-----|----------------------------------------------------------------|----------------------------------------------------------------------------------------------------------------------------------------------------------------------------------------------------------------------------------------------------------------------------------------------------------------------------------------------------------------------------------------------------------------------------------------------------------------------------------------------------------------------------------------------------------------------------------------------------------------------------------------------------------------------------------------------------------------------------------------------------------------------------------------------------------------------------------------------------------------------------------------------------------------------------------------------------------------------------------------------------------------------------------------------------------------------------------------------------------------------------------------------------------------------------------------------------------------------------------------------------------------------------------------------------------------------------------------------------------------------------------------------------------------------------------------------------------------------------------------------------------------------------------------------------------------------------------------------------------------------------------------------------------------------------------------------------------------------------------------------------------------------------------------------------------------------------------------------------------------------------------------------------------------------------------------------------------------------------------------------------------------------------------------|--|----------------------------------------------------------------------------------------------------------|-----------------------------------------------------------------------------------------------------------|----------------------------------------------------------------------------------------------------------|----------------------------------------------------------------------------------------------------------------------------------------------------------------------------------------------------------------------|------------------------------------|
| 233 | HUMAN<br>Microarray<br>CEL<br>file to<br>candidate<br>pathways | <p>This workflow takes in a CEL file and a normalisation method then returns a series of images/graphs which represent the same output obtained using the MADAT software package (MicroArray Data Analysis Tool) [<a href="http://www.bioinf.manchester.ac.uk/MADAT/index.html">http://www.bioinf.manchester.ac.uk/MADAT/index.html</a>]. Also returned by this workflow are a list of the top differentially expressed genes (size dependant on the number specified as input - geneNumber), which are then used to find the candidate pathways which may be influencing the observed changes in the microarray data. By identifying the candidate pathways, more detailed insights into the gene expression data can be obtained. NOTE - You will also need to install R and Rserv on your machine and install the libraries required by the R script into you R library directory (see for basic info: <a href="http://www.cs.man.ac.uk/~fisherp/rlib.html">http://www.cs.man.ac.uk/~fisherp/rlib.html</a>) The example inputs for this workflow are as follows: Samples1 = one or more CEL files for cross-correlating with Samples2 CEL files (new line separated including the .CEL): Liver Day1 Mouse.CEL Liver Day2 Mouse.CEL Samples2 = one or more CEL files for cross-correlating with Samples1 CEL files (new line separated including the .CEL): Kidney Day1 Mouse.CEL Kidney Day2 Mouse.CEL geneNumber = the number of differentially expressed gene to be returned above a given p-value, e.g. 20 arrayTypeAffy = the name of the Mouse AffyMetrix array used, e.g. mouse4302, hgu133a... path = the direct path to the CEL file location, e.g. C:/Microarray Data/CEL FILES/ - note the forward slashes NormalizationMethod = the type of normalisation to perform, e.g. rma, gcrma or mmgmos testMethod = e.g. limma, mmttest or pplr p-value = the p-value cut-off value for the array data, e.g. 0.05 foldChange = the fold change value for the microarray data, e.g. 1 (means greater than 1 or less than -1)</p> |  | affymetrix,cel,file<br>,genotype,kegg,microarray,nbiconworkflows,pathway-driven,pathways,phenotype,shim, | <a href="http://www.myexperiment.org/workflows/10.html">http://www.myexperiment.org/workflows/10.html</a> | arrayTypeAffy ,path ,NormalizationMethod ,testMethod ,pValue ,foldChange ,geneNumber ,samples1 ,samples2 | hist<br>,boxNorm<br>,pca ,geneID<br>,pathway<br>description<br>,merged<br>pathways<br>,pathway list<br>,gene<br>descriptions<br>,ensembl<br>database<br>release<br>,KEGG<br>pathway<br>release<br>,BioMart<br>report | Microarrays,<br>Systems<br>Biology |
| 234 | Entrez<br>Gene to<br>KEGG<br>Pathway                           | <p>This workflow takes in Entrez gene ids then adds the string ncbi-geneid: to the start of each gene id. These gene ids are then cross-referenced to KEGG gene ids. Each KEGG gene id is then sent to the KEGG pathway database and its relevant pathways returned.</p>                                                                                                                                                                                                                                                                                                                                                                                                                                                                                                                                                                                                                                                                                                                                                                                                                                                                                                                                                                                                                                                                                                                                                                                                                                                                                                                                                                                                                                                                                                                                                                                                                                                                                                                                                               |  | entrez,genotype,kegg,ncbi,pathway,pathway-driven,pathways,phenotype,shim                                 | <a href="http://www.myexperiment.org/workflows/15.html">http://www.myexperiment.org/workflows/15.html</a> | gene                                                                                                     | merged kegg<br>pathways                                                                                                                                                                                              | Microarrays,<br>Systems<br>Biology |

|     |                                         |                                                                                                                                                                                                                                                                                                                                                                                                                                                                                            |  |                                                                                                           |                                                                                                             |                                       |                                                                                                                                                                               |             |
|-----|-----------------------------------------|--------------------------------------------------------------------------------------------------------------------------------------------------------------------------------------------------------------------------------------------------------------------------------------------------------------------------------------------------------------------------------------------------------------------------------------------------------------------------------------------|--|-----------------------------------------------------------------------------------------------------------|-------------------------------------------------------------------------------------------------------------|---------------------------------------|-------------------------------------------------------------------------------------------------------------------------------------------------------------------------------|-------------|
| 235 | Workflow for Protein Sequence Analysis  | This workflow performs a generic protein sequence analysis. In order to do that a novel protein sequence enters into the software along with a list of known protein identifiers chosen by the biologist to perform a homology search, followed by a multiple sequence alignment and finally a phylogenetic analysis.                                                                                                                                                                      |  | analysis, BLAST, homology, multiple sequence alignment, phylogenetic tree, protein, sequence, tree, wpsa, | <a href="http://www.myexperiment.org/workflows/124.html">http://www.myexperiment.org/workflows/124.html</a> | Input Sequence, ListUser, NJ or UPGMA | Blast Report, Protein Description, Image Alignment, Output Tree (N or UPGMA), Distance Outfile, Rooted Tree, Unrooted Tree, Not Protein Sequence, It is a DNA or RNA sequence | Microarrays |
| 236 | Mapping OligoNucleotides to an assembly | The former version of the workflow expected that results from BioMART only report transcripts when the query (the probe in our case) are entirely encapsulated in an exon of that transcript. However, the BioMart service also returns transcripts when the query is not or only partially overlapping with an exon in the stretch on the assembly on which a transcript is defined. This resulted in too many oligos classified as having multiple transcripts or having multiple genes. |  | biomart, BLAST, blast, ensembl, microarray, r, rshell                                                     | <a href="http://www.myexperiment.org/workflows/603.html">http://www.myexperiment.org/workflows/603.html</a> | DataBaseName, Sequences               | BlastReport, BioMartReport, SequenceNotFound, BlastReport, Classifications, Report                                                                                            | Microarrays |

|     |                                                                                  |                                                                                                                                                                                                                                                                                                                                                                                                                                                                                                                                                                                                                                                                                                                                                                                                                    |  |                                                                                                         |                                                                                                             |                                    |                                                                                                 |             |
|-----|----------------------------------------------------------------------------------|--------------------------------------------------------------------------------------------------------------------------------------------------------------------------------------------------------------------------------------------------------------------------------------------------------------------------------------------------------------------------------------------------------------------------------------------------------------------------------------------------------------------------------------------------------------------------------------------------------------------------------------------------------------------------------------------------------------------------------------------------------------------------------------------------------------------|--|---------------------------------------------------------------------------------------------------------|-------------------------------------------------------------------------------------------------------------|------------------------------------|-------------------------------------------------------------------------------------------------|-------------|
| 237 | BioAID<br>ProteinD<br>iscovery<br>filterOnH<br>umanUni<br>prot<br>perDoc<br>html | This workflow finds proteins relevant to the query string via the following steps:,1) A user query: a single gene/protein name. E.g.: (EZH2 OR Enhancer of Zeste),,2) Retrieve documents: finds 'maximumNumberOfHits' relevant documents (abstract+title) based on query (the AIDA service inside is based on Apache's Lucene),3) Discover proteins: extract proteins discovered in the set of relevant abstracts with a 'named entity recognizer' trained on genomic terms using a Bayesian approach; the AIDA service inside is based on LingPipe. This subworkflow also 'filters' false positives from the discovered protein by requiring a discovery has a valid UniProt ID. Martijn Schuemie's service to do that contains only human UniProt IDs, which is why this workflow only works for human proteins. |  | AIDA,BioAID,bioassist<br>nl,demo,nbiconworkflows,protein,<br>text mining,text<br>mining<br>network,VL-e | <a href="http://www.myexperiment.org/workflows/154.html">http://www.myexperiment.org/workflows/154.html</a> | query protein                      | discovery<br>html table<br>,discovery<br>table url<br>,discovery<br>html ref                    | TextMining  |
| 238 | EBI<br>ClustalW<br>2                                                             | Perform a ClustalW multiple sequence alignment using the EBI's WSClustalW2 service. The set of sequences to align are the input, the other parameters for the search (see Job params) are allowed to default.                                                                                                                                                                                                                                                                                                                                                                                                                                                                                                                                                                                                      |  | alignment,bioinformatics,clustal,clustalw,ebi,multiplesquencealignment,sequencealignment                | <a href="http://www.myexperiment.org/workflows/203.html">http://www.myexperiment.org/workflows/203.html</a> | Sequences,Email<br>address         | ClustalW<br>alignment,ClustalW guide<br>tree,Job<br>ID,ClustalW<br>output                       | Microarrays |
| 239 | Mapping<br>microarray<br>data<br>onto<br>metabolic<br>pathways                   | This workflow maps microarray data onto metabolic pathway diagrams represented as SBML models drawn using Cell Designer. To run this workflow requires libsbml to be installed into taverna                                                                                                                                                                                                                                                                                                                                                                                                                                                                                                                                                                                                                        |  | beanshell,maxd,<br>microarray,pathway,sbml                                                              | <a href="http://www.myexperiment.org/workflows/79.html">http://www.myexperiment.org/workflows/79.html</a>   |                                    | sbml ,image                                                                                     | Microarrays |
| 240 | EBI<br>InterPro<br>Scan for<br>Taverna<br>2                                      | Perform an InterProScan analysis of a protein sequence using the EBI's WSInterProScan service. The input sequence to use and the user e-mail address are inputs, the other parameters for the analysis (see Job params) are allowed to default.,InterProScan searches a protein sequence against the protein family and domain signature databases integrated into InterPro. A set of matches to the signatures are returned, which are annotated with the corresponding InterPro and GO term assignments for these signature matches.,                                                                                                                                                                                                                                                                            |  | interpro,interproscan,looping,sequence,term                                                             | <a href="http://www.myexperiment.org/workflows/820.html">http://www.myexperiment.org/workflows/820.html</a> | Email<br>address,Sequence or<br>ID | InterProScan<br>text result<br>,InterProScan XML result<br>,Job ID<br>,InterProScan GFF ,status | Microarrays |



|     |                                          |                                                                                                                                                                                                                                                                                                                                                                                                  |  |                                                                                                                                                                                          |                                                                                                             |                      |                                                                                                                                |             |
|-----|------------------------------------------|--------------------------------------------------------------------------------------------------------------------------------------------------------------------------------------------------------------------------------------------------------------------------------------------------------------------------------------------------------------------------------------------------|--|------------------------------------------------------------------------------------------------------------------------------------------------------------------------------------------|-------------------------------------------------------------------------------------------------------------|----------------------|--------------------------------------------------------------------------------------------------------------------------------|-------------|
| 241 | Protein search<br>fetch<br>align<br>tree | An implementation of the classical sequence analysis workflow:,1) Find homologues (sequence similarity search),2) Fetch homologues,3) Align homologues (multiple sequence alignment),4) Produce phylogenetic tree,In this implementation the EBI webservices are used:.,1) WU-BLAST (WSWUBlast) blastp vs. UniProtKB,2) dbfetch (WSDbfetch),3) ClustalW (WScLustalW2),4) ClustalW (WScLustalW2), |  | alignment,bioinformatics,BLAST,clustal,clustalw,dbfetch,ebi,multiplesequencealignment,neighbor-joining,phylogenetictree,protein,sequencealignment,sequencesimilaritysearch,tree,wu-blast | <a href="http://www.myexperiment.org/workflows/210.html">http://www.myexperiment.org/workflows/210.html</a> | Email,Sequence or ID | SSS text,SSS XML,SSS Hit IDs,SSS job id,Hit sequences,MSA alignment,MSA job id,Phylogenetic tree text,Phylogenetic tree job id | Microarrays |
| 242 | Simplify a BLAST text file               | This workflow simplifies a BLAST text file into identifiers, descriptions and values (P, E-values). In order to extract the relevant ids etc. you need to pass the relevant string into the corresponding port, e.g. the default port being used is gi. This has been passed gi. For any other ports simply pass in the string the SAME as the port name, e.g. seq id, p, per etc.               |  | bioinformatics,BLAST,geneidentifier,gi,matrix,sequence,similarity,simple,simplifier,substitution,summar y                                                                                | <a href="http://www.myexperiment.org/workflows/22.html">http://www.myexperiment.org/workflows/22.html</a>   | blast file           | simplified output                                                                                                              | Microarrays |
| 243 | Liliopsida Protein Alignment             | This workflow retrieves Liliopsida chloroplast petb gene sequences from NCBI Nucleotide, removes duplicate sequences and saves the results at BioExtract Server. These results are then converted into GenBank format and fed into Fetch Translation, which removes the translation from the CDS coding region. Translations are then used to build a multiple alignment using ClustalW.         |  | alignment,bioextract,multiplesequencealignment,nucleotide,sequence alignment,alignment,bioextract,multiplesequencealignment,nucleotide,sequencealignment                                 | <a href="http://www.myexperiment.org/workflows/550.html">http://www.myexperiment.org/workflows/550.html</a> |                      |                                                                                                                                | Microarrays |

|     |                                                                      |                                                                                                                                                                                                                                                                                                                                                                                                                        |  |                                                                                                                                                   |                                                                                                           |                                   |                                                                                                                                |                              |
|-----|----------------------------------------------------------------------|------------------------------------------------------------------------------------------------------------------------------------------------------------------------------------------------------------------------------------------------------------------------------------------------------------------------------------------------------------------------------------------------------------------------|--|---------------------------------------------------------------------------------------------------------------------------------------------------|-----------------------------------------------------------------------------------------------------------|-----------------------------------|--------------------------------------------------------------------------------------------------------------------------------|------------------------------|
| 244 | KEGG pathways common to both QTL and microarray based investigations | This workflow takes in two lists of KEGG pathway ids. These are designed to come from pathways found from genes in a QTL (Quantitative Trait Loci) region, and from pathways found from genes differentially expressed in a microarray study. By identifying the intersecting pathways from both studies, a more informative picture is obtained of the candidate processes involved in the expression of a phenotype. |  | common,data-driven,disease,genotype,kegg,microarray,pathway,pathway-driven,pathways,phenotype,similarity                                          | <a href="http://www.myexperiment.org/workflows/13.html">http://www.myexperiment.org/workflows/13.html</a> | qtl pathways ,microarray pathways | intersecting pathways                                                                                                          | Microarrays, Systems Biology |
| 245 | Mouse Microarray Analysis                                            | This workflow takes in probesets from and AffyMetrix micorarray experiment and returns: the genes ; gene start and end positions; chromosome where genes reside; ensembl trasncripts; SwissProt ids; affy probeset identifiers for chips Mouse430 2 and Mouse430a 2.                                                                                                                                                   |  | affymatrix,cel,data-drive,disease,expression,file,gene,genotype,kegg,microarray,mouse,nbiconworkflows,pathway-driven,phenotype ,RNA,shim,uniprot, | <a href="http://www.myexperiment.org/workflows/19.html">http://www.myexperiment.org/workflows/19.html</a> | probeset list                     | merged pathways ,gene descriptions ,pathway descriptions ,ensembl database release ,kegg pathway release ,pathway list ,report | Microarrays                  |
| 246 | BioAID ProteinDiscovery                                              | The workflow extracts protein names from documents retrieved from MedLine based on a user Query (cf Apache Lucene syntax). The protein names are filtered by checking if there exists a valid UniProt ID for the given protein name.                                                                                                                                                                                   |  | AIDA,BioAID,biorange nl,lucene,protein,proteins,pubmed,search,text mining,text mining network,uniprot,VL-e,                                       | <a href="http://www.myexperiment.org/workflows/74.html">http://www.myexperiment.org/workflows/74.html</a> | Query,maxHits parameter           | Validated Protein,UniProtID                                                                                                    | TextMining                   |

|     |                                                     |                                                                                                                                                                                                                                                                                                                                                                                                         |  |                                                                          |                                                                                                               |                   |                                                                                         |             |
|-----|-----------------------------------------------------|---------------------------------------------------------------------------------------------------------------------------------------------------------------------------------------------------------------------------------------------------------------------------------------------------------------------------------------------------------------------------------------------------------|--|--------------------------------------------------------------------------|---------------------------------------------------------------------------------------------------------------|-------------------|-----------------------------------------------------------------------------------------|-------------|
| 247 | Translate Nucleotide sequence into Peptide sequence | Translate Nucleotide sequence into Peptide sequence using EBI Service.,1) Find nucleotide sequence from EBI wsdbfetch(using ref.seq Id NM 005700),2) Translation nucleotide sequence(from 1) into peptide sequence using EBI EMBOSS4 transeq.,                                                                                                                                                          |  | pluripotency,scaffold,vector,virus                                       | <a href="http://www.myexperiment.org/workflows/45.html">http://www.myexperiment.org/workflows/45.html</a>     |                   | result sequence ,nucleotide sequence ,debug transcript ,debug detail status ,debug file | Microarrays |
| 248 | Fetch PDB flatfile from RCSB server                 | Given an identifier such as '1crn' fetches the PDB format flatfile and returns the corresponding 3D image of the protein.                                                                                                                                                                                                                                                                               |  | bioinformatics,example,mygrid,pdb,protein,protein structure,rcsb,taverna | <a href="http://www.myexperiment.org/workflows/167.html">http://www.myexperiment.org/workflows/167.html</a>   | pdbID             | pdbFlatFile                                                                             | Microarrays |
| 249 | Perform a search through NCBI eUtils eSearch        | This workflow takes in a search term and a database (e.g. snp, gene, protein) in which to perform the search over. The result is an xml file containing summary information about the search term.,Example input for this workflow are given below:.,database: pubmed,terms: cancer AND diabetes                                                                                                        |  | esearch,eutils,ncbi,pubmed                                               | <a href="http://www.myexperiment.org/workflows/25.html">http://www.myexperiment.org/workflows/25.html</a>     | terms ,database   | xml output ,IdList                                                                      | Microarrays |
| 250 | Multiple Blastp                                     | This is a workflow to automate multiple BLASTp jobs on a large list of protein sequences in FASTA format.                                                                                                                                                                                                                                                                                               |  | bioinformatics,BLAST,protein,sequence                                    | <a href="http://www.myexperiment.org/workflows/90.html">http://www.myexperiment.org/workflows/90.html</a>     | Protein sequences | Blast reports                                                                           | Microarrays |
| 251 | Image Mining with RapidMiner                        | This is an image mining process using the image mining Web service provided by NHRF within e-Lico. It first uploads a set of images found in a directory, then preprocesses the images and visualizes the result. Furthermore, references to the uploaded images are stored in the local RapidMiner repository so they can later be used for further processing without uploading images a second time. |  | datamining,e-lico,imagemining,kup,rapidminer                             | <a href="http://www.myexperiment.org/workflows/1229.html">http://www.myexperiment.org/workflows/1229.html</a> |                   |                                                                                         | Microarrays |

|     |                                                                   |                                                                                                                                                                                                                                                                                                                                                                                                                                                                                                                                                                                                                                                                                                                                                                                                                                                                                                                                                                                                                                                                                                                                                                                                                                                  |  |                                                                         |                                                |                                                   |                                                                                                                                                                                             |                              |
|-----|-------------------------------------------------------------------|--------------------------------------------------------------------------------------------------------------------------------------------------------------------------------------------------------------------------------------------------------------------------------------------------------------------------------------------------------------------------------------------------------------------------------------------------------------------------------------------------------------------------------------------------------------------------------------------------------------------------------------------------------------------------------------------------------------------------------------------------------------------------------------------------------------------------------------------------------------------------------------------------------------------------------------------------------------------------------------------------------------------------------------------------------------------------------------------------------------------------------------------------------------------------------------------------------------------------------------------------|--|-------------------------------------------------------------------------|------------------------------------------------|---------------------------------------------------|---------------------------------------------------------------------------------------------------------------------------------------------------------------------------------------------|------------------------------|
| 252 | From cDNA Microarray Raw Data to Pathways and Published Abstracts | <p>This workflow takes in a CDNA raw file and a normalisation method then returns a series of images/graphs which represent the same output obtained using the R and bioconductor. Also returned by this workflow are a list of the top differentially expressed genes (size dependant on the number specified as input - geneNumber), which are then used to find the candidate pathways which may be influencing the observed changes in the microarray data. By identifying the candidate pathways, more detailed insights into the gene expression data can be obtained. These pathways are subsequently used to obtain a corpus of published abstracts (from the PubMed database) relating to each biological pathway identified. These pathways are subsequently used to obtain a corpus of published abstracts (from the PubMed database) relating to each biological pathway identified. Also it generates a pie chart which, indicates the number of genes in a dataset that are regulated by a known transcriptional regulator, or by combination of regulators, and can suggest previously unknown regulatory interactions. The information for each regulon comes from files that are created manually from the EcoCyc database.</p> |  | e.coli,kegg,KeggPathways,pathways,pubmed,systemsbiology                 | http://www.myexperiment.org/workflows/187.html | path ,pValue ,foldChange ,geneNumber ,regulonDir  | Kegg gene desc ,merged pathway desc ,genes pathways ,pathway abstracts ,image ,boxNorm ,geneID ,prontTip ,pieChartRegulon ,PieList ,GeneList ,sizeFnr ,sizeArcA ,sizeGene ,geneldwithoutEco | Microarrays, Systems Biology |
| 253 | GBSeq test                                                        | <p>This workflow retrieves nucleotide and protein sequences with the literature and references associated to them given a protein and a nucleotide id.</p>                                                                                                                                                                                                                                                                                                                                                                                                                                                                                                                                                                                                                                                                                                                                                                                                                                                                                                                                                                                                                                                                                       |  | bioinformatics,example,mygrid,nucleotide,protein,retrieval,shim,taverna | http://www.myexperiment.org/workflows/168.html | nucleotide sequences,protein sequences,literature | protein xml ,nuc xml ,nuc tiny ,nuc fasta ,prot fasta ,prot insd ,nuc insd ,prot tiny                                                                                                       | Sequence Analysis            |
| 254 | Identification of differential genes using t-tests by R           | <p>This workflow starts by retrieving the names of microarray datasets from the Maxd database. The user has to select sets of control and test data for analysis using t-tests by R. A list of significant differentially expressed genes is then analysed using the Go Term Finder tool which generates a list of GO terms associated with the genes. A CSV file containing the list of significant genes is also generated.</p>                                                                                                                                                                                                                                                                                                                                                                                                                                                                                                                                                                                                                                                                                                                                                                                                                |  | beanshell,maxd,microarray,r,systemsbiology,user interaction             | http://www.myexperiment.org/workflows/181.html |                                                   | pdf,csv,spurious genes                                                                                                                                                                      | Microarrays                  |

|     |                                                                                    |                                                                                                                                                                                                                                                                                                                                                                                                                                                                                                      |  |                                                                                                                                      |                                                                                                             |       |                          |             |
|-----|------------------------------------------------------------------------------------|------------------------------------------------------------------------------------------------------------------------------------------------------------------------------------------------------------------------------------------------------------------------------------------------------------------------------------------------------------------------------------------------------------------------------------------------------------------------------------------------------|--|--------------------------------------------------------------------------------------------------------------------------------------|-------------------------------------------------------------------------------------------------------------|-------|--------------------------|-------------|
| 255 | Lymphoma type prediction based on microarray data                                  | Scientific value Using gene-expression patterns associated with DLBCL and FL to predict the lymphoma type of an unknown sample. Using SVM (Support Vector Machine) to classify data, and predicting the tumor types of unknown examples. Steps Querying training data from experiments stored in caArray. Preprocessing, or normalize the microarray data. Adding training and testing data into SVM service to get classification result.                                                           |  | cabig,cagrid,cancerresearch,classification,geneexpression,glabus,gridserve,lymphoma,lymphomaworkflow,microarray,supportvectormachine | <a href="http://www.myexperiment.org/workflows/746.html">http://www.myexperiment.org/workflows/746.html</a> | EXPID | Result CSV               | Microarrays |
| 256 | Identification of differential genes using the LIMMA Bioconductor package within R | This workflow starts by retrieving the names of microarray datasets from the Maxd database. The user has to select sets of control and test data which are then analysed by the LIMMA Bioconductor package in an R script. This produces a list of significant differentially expressed genes which is then analysed using the Go Term Finder tool to generate a PDF report of the common GO terms associated with the genes. A CSV file containing the list of significant genes is also generated. |  | bioconductor,limma,maxd,microarray,r,userinteraction                                                                                 | <a href="http://www.myexperiment.org/workflows/246.html">http://www.myexperiment.org/workflows/246.html</a> |       | pdf, csv, spurious genes | Microarrays |

|     |                                                |                                                                                                                                                                                                                                                                                 |  |                                                                                                                                                                                                                                      |                                                                                                             |                                  |                                                                                |                 |
|-----|------------------------------------------------|---------------------------------------------------------------------------------------------------------------------------------------------------------------------------------------------------------------------------------------------------------------------------------|--|--------------------------------------------------------------------------------------------------------------------------------------------------------------------------------------------------------------------------------------|-------------------------------------------------------------------------------------------------------------|----------------------------------|--------------------------------------------------------------------------------|-----------------|
| 257 | Protein alignment transmembrane                | Transmembrane domain prediction using EMBOSS tmap with an input sequence alignment of homologues;1) Sequence similarity search (SSS) to find homologues,2) Fetch sequences of hits,3) Multiple sequence alignment (MSA) of hit sequences,4) EMBOSS tmap with alignment from 3., |  | alignment, bioinformatics, clustal, clustalw, dbfetch, emboss, embosstmap, FASTA, multiple sequence alignment, protein, protein annotation, sequence alignment, sequence similarity search, transmembrane, transmembrane prediction, | <a href="http://www.myexperiment.org/workflows/213.html">http://www.myexperiment.org/workflows/213.html</a> | Email, Sequence or ID            | SSS job ID, MSA job ID, tmap prediction, SSS hit IDs, MSA alignment, tmap plot | Microarrays     |
| 258 | Fasta string to fasta list                     | Split a string containing a set of sequences in fasta format into a list for fasta formatted sequences.                                                                                                                                                                         |  | bioinformatics, fastaformat                                                                                                                                                                                                          | <a href="http://www.myexperiment.org/workflows/228.html">http://www.myexperiment.org/workflows/228.html</a> | fasta string                     | fasta list                                                                     | Microarrays     |
| 259 | Retrieve Protein Sequence                      | Retrieves a protein sequence in Fasta format from GenBank, given a GenBank identifier. Example input for this workflow is: EDL10223.1                                                                                                                                           |  | bioinformatics, neuroscience, newcastle, protein, sequence                                                                                                                                                                           | <a href="http://www.myexperiment.org/workflows/368.html">http://www.myexperiment.org/workflows/368.html</a> | ID                               | protein sequence, blast report                                                 | Microarrays     |
| 260 | Download pathways for external references list | Takes a list of external references to genes/proteins/metabolites, finds all pathways on WikiPathways that contain one of the given genes/proteins/metabolites and downloads them in a given file format.                                                                       |  | pathway, pathway driven, pathway-image, pathways, wikipathways                                                                                                                                                                       | <a href="http://www.myexperiment.org/workflows/393.html">http://www.myexperiment.org/workflows/393.html</a> | xreflist, output path, file type | written files                                                                  | Systems Biology |

|     |                                                     |                                                                                                                                                                                                                                                                                                                                                                                                                          |  |                                                                                                                                                                                    |                                                                                                               |                                         |                                           |                 |
|-----|-----------------------------------------------------|--------------------------------------------------------------------------------------------------------------------------------------------------------------------------------------------------------------------------------------------------------------------------------------------------------------------------------------------------------------------------------------------------------------------------|--|------------------------------------------------------------------------------------------------------------------------------------------------------------------------------------|---------------------------------------------------------------------------------------------------------------|-----------------------------------------|-------------------------------------------|-----------------|
| 261 | BioAID<br>Discover proteins from text plus synonyms | This workflow discovers proteins from plain text and adds synonyms using Martijn Schuemie's proteins synonym service. Proteins are discovered with the AIDA 'Named Entity Recognize' web service by Sophia Katrenko (service based on LingPipe), from which output it filters out proteins. The Named Recognizer services uses the pre-learned genomics model, named 'MedLine', to find genomics concepts in plain text. |  | AIDA,BioAID,biorange<br>nl,protein,synonyms,text<br>mining,text<br>mining network                                                                                                  | <a href="http://www.myexperiment.org/workflows/81.html">http://www.myexperiment.org/workflows/81.html</a>     |                                         |                                           | TextMining      |
| 262 | Get pathways by external reference                  | Finds pathways on WikiPathways by an external gene/protein/metabolite reference                                                                                                                                                                                                                                                                                                                                          |  | pathway,pathway-driven,pathway-image,pathways,wikipathways                                                                                                                         | <a href="http://www.myexperiment.org/workflows/391.html">http://www.myexperiment.org/workflows/391.html</a>   | identifier,system code                  | pathway names,pathway species,pathway ids | Systems Biology |
| 263 | tRNAscan                                            | Search a nucleotide sequence for tRNA genes using the tRNAscan-SE tool                                                                                                                                                                                                                                                                                                                                                   |  | bioinformatics,nucleotidesequence,nucleotidesequenceannotation,tRNA,trnascan,trnascan-se                                                                                           | <a href="http://www.myexperiment.org/workflows/245.html">http://www.myexperiment.org/workflows/245.html</a>   | Sequence or ID or GI<br>Sequence origin | tRNAscan output                           | Microarrays     |
| 264 | microRNA to KEGG Pathways and Abstracts             | Workflow takes in a text file of microRNAs from microCOSM (at the EBI) and outputs a list of KEGG pathway information, including genes in pathways and pathway abstracts from PubMed. The results can then be used in various text mining applications/workflows to rank the results against a given disease.                                                                                                            |  | bconv,beanshell,elico,ensembl,esearch,eutils,geneidentifier,geneid,genes,homosapiens,kegg,KeggID,microrna,ncbi,pathway,pathway-driven,pathways,pubmed,swissprot,textmining,uniprot | <a href="http://www.myexperiment.org/workflows/1138.html">http://www.myexperiment.org/workflows/1138.html</a> |                                         |                                           | TextMining      |

|     |                                                                     |                                                                                                                                                                                                                                                                                                                                                                                                                                                                                        |  |                                                                                                                                                                                         |                                                                                                             |                                    |                                                                                                                           |             |
|-----|---------------------------------------------------------------------|----------------------------------------------------------------------------------------------------------------------------------------------------------------------------------------------------------------------------------------------------------------------------------------------------------------------------------------------------------------------------------------------------------------------------------------------------------------------------------------|--|-----------------------------------------------------------------------------------------------------------------------------------------------------------------------------------------|-------------------------------------------------------------------------------------------------------------|------------------------------------|---------------------------------------------------------------------------------------------------------------------------|-------------|
| 265 | getInChIfromMassBankPeaklist<br>ChemSpider<br>workflow<br>withImage | uses InChI's retrieved from a MassBank peaklist query to get compound information about those compounds via querying ChemSpider for information and displaying those results with image                                                                                                                                                                                                                                                                                                |  | accuratemass, bioinformatics, chemspider, compound info+image, mass spectrometry, massbank, metabolomics, systemsbiology                                                                | <a href="http://www.myexperiment.org/workflows/223.html">http://www.myexperiment.org/workflows/223.html</a> | PeakList, SecurityToken            | CompoundInfo, CompoundImage                                                                                               | Microarrays |
| 266 | Download pathways for external references list (Taverna2)           | Takes a list of external references to genes/proteins/metabolites, finds all pathways on WikiPathways that contain one of the given genes/proteins/metabolites and downloads them in a given file format.v                                                                                                                                                                                                                                                                             |  | pathway, pathway driven, pathway-image, pathways, wikipathways                                                                                                                          | <a href="http://www.myexperiment.org/workflows/642.html">http://www.myexperiment.org/workflows/642.html</a> | xreflist ,output path ,file type   | written files                                                                                                             | Microarrays |
| 267 | Arabidopsis thaliana Microarray Analysis                            | This workflow searches for genes which are found to be differentially expressed in a microarray study using Arabidopsis thaliana. The workflow requires an input of a list of differentially expressed AffyMetrix Probeset identifiers. Data is then extracted from BioMart to annotate each of the genes. The UniProt identifiers are then sent to KEGG to obtain KEGG gene identifiers. The KEGG gene identifiers are then used to search for pathways in the KEGG pathway database. |  | affymetrix, affymetrix, arabidopsis, bc onv, data-driven, ensembl, gene, geneexpression, geneid, genes, genotype, kegg, KeggPathways, microarray, pathway, phenotype, thaliana, uniprot | <a href="http://www.myexperiment.org/workflows/832.html">http://www.myexperiment.org/workflows/832.html</a> | differentially expressed probesets | merged pathways ,gene descriptions ,pathway descriptions ,kegg pathway release ,kegg external gene reference ,pathway ids | Microarrays |



|     |                                                          |                                                                                                                                                                       |  |                                                                                       |                                                                                                               |                                           |                                                                       |                 |
|-----|----------------------------------------------------------|-----------------------------------------------------------------------------------------------------------------------------------------------------------------------|--|---------------------------------------------------------------------------------------|---------------------------------------------------------------------------------------------------------------|-------------------------------------------|-----------------------------------------------------------------------|-----------------|
| 268 | EBI<br>CENSOR                                            | The CENSOR tool identifies and masks simple and complex sequence repeats found in nucleotide and protein sequences. This workflow uses the EBI's WSCensor web service |  | bioinformatics, censor, ebi, nucleotide sequence, protein, repeatmasking              | <a href="http://www.myexperiment.org/workflows/244.html">http://www.myexperiment.org/workflows/244.html</a>   | Email, Sequence or ID, Repeat library     | CENSOR job ID, CENSOR masked sequence, CENSOR alignment, CENSOR table | Microarrays     |
| 269 | EBI<br>IntAct                                            | Find protein binary interactions using the EBI's IntAct service.                                                                                                      |  | binary, bioinformatics, ebi, intact, protein, protein annotation, protein interaction | <a href="http://www.myexperiment.org/workflows/251.html">http://www.myexperiment.org/workflows/251.html</a>   | Query                                     | IntAct result                                                         | Microarrays     |
| 270 | Write pathway to disk                                    | Downloads and writes a pathway from WikiPathways to a local disk in the given file type.                                                                              |  | pathway, pathway driven, pathway image, pathways, wiki pathways                       | <a href="http://www.myexperiment.org/workflows/392.html">http://www.myexperiment.org/workflows/392.html</a>   | file type, revision, filename, pathway id | writtenFile                                                           | Systems Biology |
| 271 | Kegg DrugID                                              | This workflow accepts looks up drug identifiers from KEGG given a pathway identifier. You can enter a pathway ID in the form path:map07026                            |  | drug, example, kegg, pathway                                                          | <a href="http://www.myexperiment.org/workflows/730.html">http://www.myexperiment.org/workflows/730.html</a>   | pathway Id                                | Drug Id                                                               | Systems Biology |
| 272 | Construction of skeleton SBML model using subsystem term | This workflow generates a skeleton SBML model consisting of the metabolic reactions for a given subsystem term.                                                       |  | graph, image, model, sbml, systems biology, yeast                                     | <a href="http://www.myexperiment.org/workflows/1198.html">http://www.myexperiment.org/workflows/1198.html</a> | subsystem term                            | sbml model, sbml graph                                                | Models          |
| 273 | get elements by pathway                                  | Retrieve all objects on specified pathway get elements by pathway, Input example: path:bsu00010                                                                       |  | elements, pathway                                                                     | <a href="http://www.myexperiment.org/workflows/523.html">http://www.myexperiment.org/workflows/523.html</a>   | pathway id                                | result                                                                | Systems Biology |

|     |                                                      |                                                                                                                                                                                                                                                                                                                                                                                                                                                                                                                                                                                                                                                                                                                                                                                               |  |                                                                      |                                                                                                               |                                    |                                                                                  |                 |
|-----|------------------------------------------------------|-----------------------------------------------------------------------------------------------------------------------------------------------------------------------------------------------------------------------------------------------------------------------------------------------------------------------------------------------------------------------------------------------------------------------------------------------------------------------------------------------------------------------------------------------------------------------------------------------------------------------------------------------------------------------------------------------------------------------------------------------------------------------------------------------|--|----------------------------------------------------------------------|---------------------------------------------------------------------------------------------------------------|------------------------------------|----------------------------------------------------------------------------------|-----------------|
| 274 | get drugs by pathway                                 | Retrieves all drugs on the specified pathway. input example: path:map07025 ; path:eco00020                                                                                                                                                                                                                                                                                                                                                                                                                                                                                                                                                                                                                                                                                                    |  | drug,pathway                                                         | <a href="http://www.myexperiment.org/workflows/520.html">http://www.myexperiment.org/workflows/520.html</a>   | pathway id                         | drug ids                                                                         | Systems Biology |
| 275 | Kegg pathway diagrams                                | Find pathways in which all the genes in the list are involved. For each pathway draw the pathway diagram.,Find pathways in which all the genes in the list are involved. For each pathway draw the pathway diagram. Colour all enzyme boxes with colours specified. This workflow still has one problem. The list of colours have to be specified. I would like ideally to only except one background and one foreground colour and expand that to a list with length equivalent to the number of enzymes found - just duplicating the specified colours. However with almost no Taverna documentation to speak of, none of my efforts wanted to work so far.for each protein draw a diagram of the Kegg pathway that its protein is involved in and where available visualise the structures |  | colored,coloured,enzymes,genes,pathways                              | <a href="http://www.myexperiment.org/workflows/1120.html">http://www.myexperiment.org/workflows/1120.html</a> | gene ids,Species,bg color,fg color | KeggPathwayIDs,keggimageurl,keggGeneNames,coloured images,enzyme list,genes list | Systems Biology |
| 276 | metabolic pathway.xml                                | A list of Kegg entires are supplied to the Kegg database which then retrieves the associated metabolic pathways for each entry supplied. e.g. Ids takes in a value of 351, whilst abbr takes in a value of hsa. Thus hsa:351 corresponds to neurodegenerative disorders and alzheimers disease pathways.                                                                                                                                                                                                                                                                                                                                                                                                                                                                                      |  | benchmarks                                                           | <a href="http://www.myexperiment.org/workflows/299.html">http://www.myexperiment.org/workflows/299.html</a>   | Ids ,abbr                          | KEGG pathways                                                                    | Systems Biology |
| 277 | Retrieve Pathways and Compound information from KEGG | Given a KEGG compound identifier (e.g. cpd:C00905), this workflow queries KEGG DB for pathways and compound information for each of these compounds. As the KEGG pathway service tries to find pathways which contain all input compounds, the input list is split up to circumvent this behaviour and to search for only one compound in a pathway at a time. Compounds identified in pathways are marked as red in the resulting pathway image.                                                                                                                                                                                                                                                                                                                                             |  | bget,bioinformatics,pathway                                          | <a href="http://www.myexperiment.org/workflows/738.html">http://www.myexperiment.org/workflows/738.html</a>   | bget in                            | KEGG bget ,KEGG pathways                                                         | Systems Biology |
| 278 | Get Gene Ids for Human                               | This workflow gets a list of gene ids (number depending on Ret Max value variable) for Homo sapiens. The species may be changed according to that desired, by altering the term value string constant                                                                                                                                                                                                                                                                                                                                                                                                                                                                                                                                                                                         |  | database,esearch ,gene,geneidentifier,homosapiens,human,ncbi,species | <a href="http://www.myexperiment.org/workflows/1037.html">http://www.myexperiment.org/workflows/1037.html</a> |                                    | eSearch 2 output Count ,IdList                                                   | Microarrays     |

|     |                                                      |                                                                                                                                                                                                                                                                                                                                                                                                                                                                                         |  |                                                                            |                                                                                                               |                  |                                                                                    |                 |
|-----|------------------------------------------------------|-----------------------------------------------------------------------------------------------------------------------------------------------------------------------------------------------------------------------------------------------------------------------------------------------------------------------------------------------------------------------------------------------------------------------------------------------------------------------------------------|--|----------------------------------------------------------------------------|---------------------------------------------------------------------------------------------------------------|------------------|------------------------------------------------------------------------------------|-----------------|
| 279 | blastp using the MRS system                          | This blastp workflow uses the blast service of MRS ( <a href="http://mrs.cmbi.ru.nl">http://mrs.cmbi.ru.nl</a> ). Inputs are a sequence (only amino acids, not a fasta sequence) and a database name. Valid database names that can be used are sprout, uniprot, trembl, pdb, refseq, ipi and gpdrdb. Output is returned in XML.                                                                                                                                                        |  | BLAST,protein,similaritysearch,xmli                                        | <a href="http://www.myexperiment.org/workflows/581.html">http://www.myexperiment.org/workflows/581.html</a>   | sequence ,db     | hits                                                                               | Microarrays     |
| 280 | Retrieve Pathways and Compound information from KEGG | Given a KEGG compound identifier (e.g. cpd:C00905), this workflow queries KEGG DB for pathways and compound information for each of these compounds. As the KEGG pathway service tries to find pathways which contain all input compounds, the input list is split up to circumvent this behaviour and to search for only one compound in a pathway at a time. Compounds identified in pathways are marked as red in the resulting pathway image.                                       |  | bget,bioinformatics,pathway                                                | <a href="http://www.myexperiment.org/workflows/738.html">http://www.myexperiment.org/workflows/738.html</a>   | bget in          | KEGG bget ,KEGG pathways                                                           | Systems Biology |
| 281 | Kegg pathway diagrams                                | Find pathways in which all the genes in the list are involved. For each pathway draw the pathway diagram.,for each protein draw a diagram of the Kegg pathway that its protein is involved in and where available visualise the structures                                                                                                                                                                                                                                              |  | gene,pathway,visualise                                                     | <a href="http://www.myexperiment.org/workflows/1118.html">http://www.myexperiment.org/workflows/1118.html</a> | gene ids,Species | attachmentlist,KeggPathwayIDs,attachmentlist2,KeggImage,keggimageurl,keggGeneNames | Systems Biology |
| 282 | caArray data retrieval                               | Query all the gene expression data in a caArray experiment. Returns a evenly divided gene expression data set with corresponding class information. They can be later used as training and test data set in many classification algorithms.,Query all the gene expression data in a caArray experiment. Returns a evenly divided gene expression data set with corresponding class information. They can be later used as training and test data set in many classification algorithms. |  | caarray,cabig,cagrid,functionalworkflow,gene,global,gridservice,microarray | <a href="http://www.myexperiment.org/workflows/963.html">http://www.myexperiment.org/workflows/963.html</a>   | EXP ID           | testClass ,trainingClass ,trainingData ,testData                                   | Microarrays     |

|     |                                                                                 |                                                                                                                                                                                                                                                                                                                                                                                                                                                                                                |  |                                                                            |                                                                                                               |                                   |                                                                   |                 |
|-----|---------------------------------------------------------------------------------|------------------------------------------------------------------------------------------------------------------------------------------------------------------------------------------------------------------------------------------------------------------------------------------------------------------------------------------------------------------------------------------------------------------------------------------------------------------------------------------------|--|----------------------------------------------------------------------------|---------------------------------------------------------------------------------------------------------------|-----------------------------------|-------------------------------------------------------------------|-----------------|
| 283 | caArray data retrieval                                                          | <p>Query all the gene expression data in a caArray experiment. Returns a evenly divided gene expression data set with corresponding class information. They can be later used as training and test data set in many classification algorithms.,Query all the gene expression data in a caArray experiment. Returns a evenly divided gene expression data set with corresponding class information. They can be later used as training and test data set in many classification algorithms.</p> |  | caarray,cabig,cagrid,functionalworkflow,gene,global,gridservice,microarray | <a href="http://www.myexperiment.org/workflows/963.html">http://www.myexperiment.org/workflows/963.html</a>   | EXP ID                            | testClass,trainingClass,trainingData,testData                     | Microarrays     |
| 284 | Parse unique proteins from Blast file                                           | <p>The workflow parses uses the blast results to determine the unique proteins found in the target genome that have no simlairty to the source genome. Using these unique protein ids, and the original target protein fasta file, a fasta file of unique proteins is created.</p>                                                                                                                                                                                                             |  | protein                                                                    | <a href="http://www.myexperiment.org/workflows/1184.html">http://www.myexperiment.org/workflows/1184.html</a> | blastFile,tfasta,cfasta file path |                                                                   | Microarrays     |
| 285 | Calculating frequencies of gene expression levels using microarray data in MaxD | <p>This workflow retrieves data from the MaxD microarray database and calculates the frequencies of gene expression levels using an R script</p>                                                                                                                                                                                                                                                                                                                                               |  | beanshell,database,expression,genome,image,maxd,microarray,r,xpath         | <a href="http://www.myexperiment.org/workflows/1125.html">http://www.myexperiment.org/workflows/1125.html</a> |                                   |                                                                   | Microarrays     |
| 286 | NCBI Gito Kegg Pathway Descriptions                                             | <p>This workflow accepts a list of NCBI gene identifiers and returns descriptions of gene functions and a list of all pathways each gene is involved in (plus pathway image) from the KEGG database. This workflow replaces the earlier SOAP version with the new KEGG REST services</p>                                                                                                                                                                                                       |  | bconv,genbank,gene,genes,gi,kegg,ncbi,pathway,pathways                     | <a href="http://www.myexperiment.org/workflows/2659.html">http://www.myexperiment.org/workflows/2659.html</a> | genes                             | kegg mouseID,gene description,pathDescRest,pathwayID,PathwayImage | Systems Biology |

|     |                                                                                 |                                                                                                                                                                                                                                                                                                                                                                                                                                                     |  |                                                                                                                                    |                                                                                                               |                |                                                                                                           |                    |
|-----|---------------------------------------------------------------------------------|-----------------------------------------------------------------------------------------------------------------------------------------------------------------------------------------------------------------------------------------------------------------------------------------------------------------------------------------------------------------------------------------------------------------------------------------------------|--|------------------------------------------------------------------------------------------------------------------------------------|---------------------------------------------------------------------------------------------------------------|----------------|-----------------------------------------------------------------------------------------------------------|--------------------|
| 287 | Unigene<br>ID to<br>KEGG<br>Pathway<br>s                                        | This workflow accepts a list of Unigene gene identifiers and returns descriptions of gene functions and a list of all pathways each gene is involved in (plus pathway image) from the KEGG database. This workflow replaces the earlier SOAP version with the new KEGG REST services                                                                                                                                                                |  | bconv, gene, gene<br>s, kegg, pathway, p<br>athways                                                                                | <a href="http://www.myexperiment.org/workflows/2673.html">http://www.myexperiment.org/workflows/2673.html</a> | genes          | geneList<br>, kegg<br>mouseID<br>, gene<br>description<br>, pathDescRest<br>, pathwayID<br>, PathwayImage | Systems<br>Biology |
| 288 | gene<br>ontology<br>diagram.<br>xml                                             | This workflow builds up a subgraph of the Gene Ontology ( <a href="http://www.geneontology.org">http://www.geneontology.org</a> ) to show the context for a supplied term or terms. It shows this context by colouring all ancestors of the term, all children and all siblings. By default, ancestors of the supplied term or terms are coloured orange, siblings purple and direct children teal. Other terms appear in the default wheat colour. |  | benchmarks                                                                                                                         | <a href="http://www.myexperiment.org/workflows/317.html">http://www.myexperiment.org/workflows/317.html</a>   | termID         | graphical                                                                                                 | Microarrays        |
| 289 | Gene to<br>Pubmed                                                               | This workflow takes in a list of gene names and searches the PubMed database for corresponding articles. Any matches to the genes are then retrieved (abstracts only). These abstracts are then returned to the user.                                                                                                                                                                                                                               |  | abstracts, efetch,<br>e<br>search, gene, gene<br>identifier, geneid,<br>genes, literature,<br>medline, pubmed,<br>text, textmining | <a href="http://www.myexperiment.org/workflows/1375.html">http://www.myexperiment.org/workflows/1375.html</a> | gene names     | gene<br>abstracts                                                                                         | Microarrays        |
| 290 | Get<br>Pathway-<br>Genes<br>and gene<br>descripti<br>on by<br>Entrez<br>gene id | Given a specific entrez gene id, returns the pathways that this gene participates in and for each of those pathways which genes (including their description) are associated with.                                                                                                                                                                                                                                                                  |  | entrez, gene, gene<br>description, id, kegg,<br>pathway, pathways                                                                  | <a href="http://www.myexperiment.org/workflows/2843.html">http://www.myexperiment.org/workflows/2843.html</a> | entrez gene id | Pathway<br>, geneList<br>, gene<br>description                                                            | Systems<br>Biology |

|     |                                                                              |                                                                                                                                                                                                                                                                                                                                                                                                                                                                                                                                                                                                     |  |                                                                                                     |                                                                                                               |                                                                                         |                                    |                 |
|-----|------------------------------------------------------------------------------|-----------------------------------------------------------------------------------------------------------------------------------------------------------------------------------------------------------------------------------------------------------------------------------------------------------------------------------------------------------------------------------------------------------------------------------------------------------------------------------------------------------------------------------------------------------------------------------------------------|--|-----------------------------------------------------------------------------------------------------|---------------------------------------------------------------------------------------------------------------|-----------------------------------------------------------------------------------------|------------------------------------|-----------------|
| 291 | Match concept profiles with predefined set                                   | Purpose of workflow: The workflow can be used to match a set of concept profiles with another set of concept profiles. The result is a list of concepts ordered by their match to the query concept profiles. The workflow matches two sets of concept profiles. At the time of writing the concepts are derived from human, rat, and mouse terminologies, ontologies, and database identifiers. The profiles are lists of concepts ranked by their association with the identifying concept, as determined by co-location statistics computed from MedLine (up until 2009 at the time of writing). |  | annotation, association, concept, database, discovery, gene, GO, ontologies, similarity, statistics | <a href="http://www.myexperiment.org/workflows/3396.html">http://www.myexperiment.org/workflows/3396.html</a> | Cutoff, Match concept set, Query concept ID                                             | Match concept ID, Similarity score | Microarrays     |
| 292 | retrieve protein sequence and do a BLAST with options from DDBJ Web services | retrieve protein sequence and do a BLAST with options from DDBJ Web services                                                                                                                                                                                                                                                                                                                                                                                                                                                                                                                        |  | bioinformatics, BLAST, protein, sequence, services                                                  | <a href="http://www.myexperiment.org/workflows/1452.html">http://www.myexperiment.org/workflows/1452.html</a> | bioinformatics programs, sequence database, bioinformatics parameter, UniProt accession | blast report ddbj                  | Microarrays     |
| 293 | Find pathways in which two genes co-occur (in WikiPathways)                  | This workflow finds all pathways in which two gene symbols co-occur. This workflow was created as an exercise for the Managing and Integrating Information in the Life Sciences course 2013 at the LUMC, which is organized by the Netherlands Bioinformatics Center (NBIC).                                                                                                                                                                                                                                                                                                                        |  | pathways                                                                                            | <a href="http://www.myexperiment.org/workflows/3636.html">http://www.myexperiment.org/workflows/3636.html</a> | Gene 1, Gene 2                                                                          | pathway titles, pathway uris       | Systems Biology |

|     |                                                                                                    |                                                                                                    |  |                                                   |                                                                                                               |                                                                                     |                                    |             |
|-----|----------------------------------------------------------------------------------------------------|----------------------------------------------------------------------------------------------------|--|---------------------------------------------------|---------------------------------------------------------------------------------------------------------------|-------------------------------------------------------------------------------------|------------------------------------|-------------|
| 294 | DAS sequence retrieval                                                                             | Retrieve Protein or Genome sequences using the Distributed Annotation System (DAS).                |  | das,genome,protein,sequence                       | <a href="http://www.myexperiment.org/workflows/2157.html">http://www.myexperiment.org/workflows/2157.html</a> | ID,DasSource,start,stop                                                             | Sequence DAS format,Service status | Microarrays |
| 295 | retrieve nucleotide sequence and do a high speed BLAST and extract position from DDBJ Web services | retrieve nucleotide sequence and do a high speed BLAST and extract position from DDBJ Web services |  | bioinformatics,BLAST,nucleotide,sequence,services | <a href="http://www.myexperiment.org/workflows/1455.html">http://www.myexperiment.org/workflows/1455.html</a> | bioinformatics program ,sequence database ,bioinformatics parameter ,DDBJ accession | position blast report ddbj         | Microarrays |

|     |                     |                                                                                                                                                                                                                                                                                                                                                                                                                                                                                                                                                                                                                                                                                                                                                                                                                                                                                                                                                                                                                                                                                                                                                                                                                                                                                                                                                                                                                                                                                                                                                                                                                                                                                                                  |  |                                                          |                                                 |                                                     |                                                                                                                                                              |                    |
|-----|---------------------|------------------------------------------------------------------------------------------------------------------------------------------------------------------------------------------------------------------------------------------------------------------------------------------------------------------------------------------------------------------------------------------------------------------------------------------------------------------------------------------------------------------------------------------------------------------------------------------------------------------------------------------------------------------------------------------------------------------------------------------------------------------------------------------------------------------------------------------------------------------------------------------------------------------------------------------------------------------------------------------------------------------------------------------------------------------------------------------------------------------------------------------------------------------------------------------------------------------------------------------------------------------------------------------------------------------------------------------------------------------------------------------------------------------------------------------------------------------------------------------------------------------------------------------------------------------------------------------------------------------------------------------------------------------------------------------------------------------|--|----------------------------------------------------------|-------------------------------------------------|-----------------------------------------------------|--------------------------------------------------------------------------------------------------------------------------------------------------------------|--------------------|
| 296 | ADR-S               | <p>The ADR-S pathway seeks to establish a connection between the clinical event and the drug through different paths: (i) through proteins in common among the proteins that are drug targets or metabolite targets and proteins associated to the clinical event (ii) through proteins that are drug targets or metabolite targets and proteins associated to the clinical event that participate in a common biological pathway. The workflow proceeds as follows: First, it checks if there are proteins that are annotated both to the clinical event and to the drug (NESTED WORKFLOW ADR substantiation through proteins). Second, it looks for connections between the drug and the clinical event through biological pathways. Information about tissue expression of the proteins is used to filter the results Input of the workflow The input of the workflow is a drug-event pair. For the clinical events, the following types are allowed: 1) UMLS CUI concept identifiers (single identifier or a list of identifiers 2) clinical events observed as adverse drug reactions according to the EU-ADR project For the drug, a ATC code (7 digit level) is required. Output of the workflow As result a list of connecting proteins as well as a list of pathways is provided. The results can be visualized as a network using Cytoscape. The network is a multi-partite graph, in which the nodes are the event, the drug and the proteins, and the edges the associations between these nodes. In addition, all the evidences supporting the associations can be explored in the graph representation. The results of the analysis through biological pathways is summarized in an html file.</p> |  | adr,adversedrugreaction,bioinformatics,drugsafety,signal | http://www.myexperiment.org/workflows/1988.html | atc<br>event<br>eventType<br>cytoscape<br>eventName | drugTargets<br>Output<br>drugEventLinkingPathways<br>eventProteinsOutput<br>drugEventLinkingProteins<br>CytoscapeResultGraph<br>eventProteins<br>drugTargets | Systems<br>Biology |
| 297 | gene subset extract | <p>This workflow functions for matching a set of genes as a part of whole gene data set and aim to extract the subset as a separate list.</p>                                                                                                                                                                                                                                                                                                                                                                                                                                                                                                                                                                                                                                                                                                                                                                                                                                                                                                                                                                                                                                                                                                                                                                                                                                                                                                                                                                                                                                                                                                                                                                    |  | gene,spreadsheet                                         | http://www.myexperiment.org/workflows/1994.html | file url ,Gene ID                                   | excel output ,split ,subset split ,matchedset ,single list                                                                                                   | Microarrays        |



|     |                                              |                                                                                                                                                                                                                                                                                                                                                                                                                                                                                                                                                                                                                                                                                                                                                                                                                                                                                                                                                                                                                                                                                                                                                                                                                                          |  |                                                                   |                                                                                                               |                                                                                   |                                                                                                                                       |                 |
|-----|----------------------------------------------|------------------------------------------------------------------------------------------------------------------------------------------------------------------------------------------------------------------------------------------------------------------------------------------------------------------------------------------------------------------------------------------------------------------------------------------------------------------------------------------------------------------------------------------------------------------------------------------------------------------------------------------------------------------------------------------------------------------------------------------------------------------------------------------------------------------------------------------------------------------------------------------------------------------------------------------------------------------------------------------------------------------------------------------------------------------------------------------------------------------------------------------------------------------------------------------------------------------------------------------|--|-------------------------------------------------------------------|---------------------------------------------------------------------------------------------------------------|-----------------------------------------------------------------------------------|---------------------------------------------------------------------------------------------------------------------------------------|-----------------|
| 298 | RAWverna Image evaluation - Read Image (RAW) | Reads an image from the given path using dcraw for image comparison.                                                                                                                                                                                                                                                                                                                                                                                                                                                                                                                                                                                                                                                                                                                                                                                                                                                                                                                                                                                                                                                                                                                                                                     |  | beanshell,dcraw,image,raw,rawverna                                | <a href="http://www.myexperiment.org/workflows/2753.html">http://www.myexperiment.org/workflows/2753.html</a> | path                                                                              | imageEquals, imageOthers, runtime                                                                                                     | Imaging         |
| 299 | Associated Region to Gene List               | Produces a gene list from the Associated Region XML file                                                                                                                                                                                                                                                                                                                                                                                                                                                                                                                                                                                                                                                                                                                                                                                                                                                                                                                                                                                                                                                                                                                                                                                 |  | associatedgenes, gene                                             | <a href="http://www.myexperiment.org/workflows/2728.html">http://www.myexperiment.org/workflows/2728.html</a> | additionalParameters, associatedSNPs                                              | errors, geneNames                                                                                                                     | Microarrays     |
| 300 | Import and convert gene list                 | This workflow extracts a column of RefSeq gene IDs from a CSV file and then converts them to Unigene identifiers                                                                                                                                                                                                                                                                                                                                                                                                                                                                                                                                                                                                                                                                                                                                                                                                                                                                                                                                                                                                                                                                                                                         |  | ensembl, gene                                                     | <a href="http://www.myexperiment.org/workflows/2665.html">http://www.myexperiment.org/workflows/2665.html</a> | genes                                                                             | Gene List                                                                                                                             | Microarrays     |
| 301 | Drug Repurposing Workflow                    | <p>The drug repurposing workflow system screens at least 20 bacterial proteomes against this set of proteins that are already being treated against using established drugs. By screening the bacterial proteomes it will be possible to find proteins of highly similar structure to those that are existing drug protein targets and so this will infer that it is highly likely that the drugs can be used as antimicrobials against these proteins of highly similar structure. Proteomes that will be screened belong to Gram positive bacteria, with special focus on Staphylococcus aureus. We look at a variety of species and strains as the company advised. A mixture of screening targets could potentially identify targets for broad-spectrum antimicrobial development.</p> <p>The drug repurposing workflow shows where in the KEGG pathways the proteins are active and therefore where the action of the drug will be in the biochemical pathways of the bacteria. The workflow will update the Ondex database where new information on Gene Ontology annotations, functional annotation and literature references are available. All information about each unique protein is made available in an HTML document.</p> |  | BLAST, FASTA, protein, proteins, proteome, similarity, uniqueness | <a href="http://www.myexperiment.org/workflows/1984.html">http://www.myexperiment.org/workflows/1984.html</a> | Drug Target Protein FASTA, Target Proteomes GI, root directory, thresholdIdentity | protein ids, NCBIGitokeggPathways pathway descriptions, GO output 2, NCBIGitokeggPathways URL, InterPro, PubMed Results 2, out, out 2 | Systems Biology |

|     |                                                                                      |                                                                                                                                                                                                                                                                      |  |                                                  |                                                                                                               |                                                              |                                           |                 |
|-----|--------------------------------------------------------------------------------------|----------------------------------------------------------------------------------------------------------------------------------------------------------------------------------------------------------------------------------------------------------------------|--|--------------------------------------------------|---------------------------------------------------------------------------------------------------------------|--------------------------------------------------------------|-------------------------------------------|-----------------|
| 302 | Gene To Pathways (Vistrails)                                                         | This workflow retrieves the pathways that are associated with given Kegg gene identifiers.                                                                                                                                                                           |  | geneidentifier,kegg,pathway                      | <a href="http://www.myexperiment.org/workflows/3064.html">http://www.myexperiment.org/workflows/3064.html</a> |                                                              |                                           | Systems Biology |
| 303 | retrieve protein sequence and do a BLAST and extract position from DDBJ Web services | retrieve protein sequence and do a BLAST and extract position from DDBJ Web services                                                                                                                                                                                 |  | bioinformatics,BLAST,ddbj,protein, services,xml  | <a href="http://www.myexperiment.org/workflows/1450.html">http://www.myexperiment.org/workflows/1450.html</a> | sequence database ,bioinformatics program ,UniProt accession | position blast report ddbj                | Microarrays     |
| 304 | RAWverna Image Evaluator - Evaluate relative                                         | Takes two images as byte array and compares them using the RAWverna Image Evaluator.                                                                                                                                                                                 |  | comparison,image,javaimageevaluator,raw,rawverna | <a href="http://www.myexperiment.org/workflows/2757.html">http://www.myexperiment.org/workflows/2757.html</a> | image                                                        | runtime,evaluator object image similarity | Imaging         |
| 305 | Retrieve a protein from the GPCRDB                                                   | This small workflow illustrates how to use the web service access provided by the GPCRDB in Taverna.,The proteinId input field is case sensitive and by default the identifiers in the GPCRDB are lowercase. You can try this mini-workflow with e.a. 'adrb2 human'. |  | gpcrdb,protein                                   | <a href="http://www.myexperiment.org/workflows/1484.html">http://www.myexperiment.org/workflows/1484.html</a> | proteinId                                                    | results                                   | Microarrays     |



|     |                        |                                                                                                                                                                                                                                                                                                                                                                                                                                                                    |                                                                                                  |                                                                                                                                                                                                                |                                                                                                                   |                                  |               |                   |
|-----|------------------------|--------------------------------------------------------------------------------------------------------------------------------------------------------------------------------------------------------------------------------------------------------------------------------------------------------------------------------------------------------------------------------------------------------------------------------------------------------------------|--------------------------------------------------------------------------------------------------|----------------------------------------------------------------------------------------------------------------------------------------------------------------------------------------------------------------|-------------------------------------------------------------------------------------------------------------------|----------------------------------|---------------|-------------------|
| 307 | GeneTalk               | GeneTalk, a web-based platform, that can filter, reduce and prioritize human sequence variants from NGS data and assist in the time consuming and costly interpretation of personal variants in clinical context. It serves as an expert exchange platform for clinicians and scientists who are searching for information about specific sequence variants and connects them to share and exchange expertise on variants that are potentially disease-relevant.   |                                                                                                  | Genetic variation annotation, Sequence variation analysis, Variant Calling, Structural variation discovery, Filtering, Annotation, Database, Exome analysis, Sequence analysis, Variant Classification, Viewer | <a href="http://seqanswers.com/wiki/GeneTalk">http://seqanswers.com/wiki/GeneTalk</a>                             | VCF                              | VCF,XLS,XLSX  | Sequence Analysis |
| 308 | MethMarker             | MethMarker facilitates the design of DNA methylation assays for COBRA, bisulfite SNUPE, bisulfite pyrosequencing, MethyLight and MSP. It also implements a systematic workflow for design, optimization and (computational) validation of DNA methylation biomarkers. This workflow starts from a preselected differentially methylated region (DMR) and results in an optimized DNA methylation assay that is ready to be tested in a large-scale clinical trial. | Epigenomics, DNA methylation                                                                     |                                                                                                                                                                                                                | <a href="http://seqanswers.com/wiki/MethMarker">http://seqanswers.com/wiki/MethMarker</a>                         |                                  |               | Sequence Analysis |
| 309 | Omixon Variant Toolkit | Omixon Target Standard, Target HLA and Target Pro are designed to help clinical, diagnostic and research labs to efficiently get the maximum accuracy and precision from their targeted NGS data.                                                                                                                                                                                                                                                                  | Comparative genomics, Mapping, Sequence analysis, Read alignment, Indel discovery, SNP discovery | Alignment, Assembly, Mapping, Colospace, Basespace                                                                                                                                                             | <a href="http://seqanswers.com/wiki/Omixon_Variant_Toolkit">http://seqanswers.com/wiki/Omixon_Variant_Toolkit</a> | FASTQ, CSFASTA, SAM, most others | SAM, VCF, GFF | Sequence Analysis |

|     |        |                                                                                                                                                                                                                                                                                                                           |                                                                                                                                                                                                                                                                                                                           |                                                                                                                                                                                                                                                                                                                     |                                                                                   |     |                 |                   |
|-----|--------|---------------------------------------------------------------------------------------------------------------------------------------------------------------------------------------------------------------------------------------------------------------------------------------------------------------------------|---------------------------------------------------------------------------------------------------------------------------------------------------------------------------------------------------------------------------------------------------------------------------------------------------------------------------|---------------------------------------------------------------------------------------------------------------------------------------------------------------------------------------------------------------------------------------------------------------------------------------------------------------------|-----------------------------------------------------------------------------------|-----|-----------------|-------------------|
| 310 | Syapse | Syapse is a platform and application suite for bringing together omics and clinical data.                                                                                                                                                                                                                                 | transcription, DNA methylation, DNA-Seq, Exome and Whole genome variant detection, Exome and whole genome variant detection, InDel discovery, New gene discovery, SNP discovery, Structural variation discovery, RNA-Seq, Small RNA, Small RNA transcriptome, Cancer biology, ChIP-Seq, Comparative genomics, Comparative | Biological Contextualization, Differentially expressed gene identification, Exome analysis, LIMS, Integrated Solution, Sample Barcoding, Sequence analysis, Variant Classification, Variant Prioritization, Visualization, Workflow, Filtering, Gene ontology, Gene ontology analysis, Genetic variation annotation | <a href="http://seqanswers.com/wiki/Syapse">http://seqanswers.com/wiki/Syapse</a> | VCF | clinical, omics | Sequence Analysis |
| 311 | BING   | biomedical informatics pipeline (BING) for the analysis of NGS data that offers several novel computational approaches to 1. image alignment, 2. signal correlation, compensation, separation, and pixel-based cluster registration, 3. signal measurement and base calling, 4. quality control and accuracy measurement. |                                                                                                                                                                                                                                                                                                                           | Basecaller, Sequencing Quality Control                                                                                                                                                                                                                                                                              | <a href="http://seqanswers.com/wiki/BING">http://seqanswers.com/wiki/BING</a>     |     |                 | Sequence Analysis |

|     |                         |                                                                                                                                                                                                                                                                                                                                                                                                                                                                                                                                                                                                                                                                                                                                                                                                                                                                            |                                                |                                                               |                                                                                                                     |                  |               |                   |
|-----|-------------------------|----------------------------------------------------------------------------------------------------------------------------------------------------------------------------------------------------------------------------------------------------------------------------------------------------------------------------------------------------------------------------------------------------------------------------------------------------------------------------------------------------------------------------------------------------------------------------------------------------------------------------------------------------------------------------------------------------------------------------------------------------------------------------------------------------------------------------------------------------------------------------|------------------------------------------------|---------------------------------------------------------------|---------------------------------------------------------------------------------------------------------------------|------------------|---------------|-------------------|
| 312 | SeqGSEA                 | Gene Set Enrichment Analysis (GSEA) of RNA-Seq Data: integrating differential expression and splicing                                                                                                                                                                                                                                                                                                                                                                                                                                                                                                                                                                                                                                                                                                                                                                      | Biomedical Sciences, Genomics, RNA-Seq         | Statistics, Functional analysis, Gene set enrichment analysis | <a href="http://seqanswers.com/wiki/SeqGSEA">http://seqanswers.com/wiki/SeqGSEA</a>                                 | BAM, SAM         | Tab separated | Sequence Analysis |
| 313 | SequenceVariantAnalyzer | DNA sequence information underpins genetic research, enabling discoveries of important biological or medical benefit. Compared with previous discovery strategies, a whole-genome sequencing study is no longer constrained by differing patterns of linkage disequilibrium, thus, in theory, is more possible to directly identify the genetic variants contributing to biological traits or medical outcomes. The rapidly evolving high-throughput DNA sequencing technologies have now allowed the fast generation of large amount of sequence data for the purpose of performing such whole-genome sequencing studies, at a reasonable cost. SequenceVariantAnalyzer, or SVA, is a software tool that we have been developing to analyze the genetic variants identified from such studies. URL: <a href="http://www.svapproject.org/">http://www.svapproject.org/</a> | Personal genomics, Genomics, Sequence analysis | Annotation, Genetic variation annotation, Genome browser      | <a href="http://seqanswers.com/wiki/SequenceVariantAnalyzer">http://seqanswers.com/wiki/SequenceVariantAnalyzer</a> | SAMtools, HMMCNV | sva           | Sequence Analysis |

|     |          |                                                                                                                                                                             |                                                                                                                                                                                                                                                                                                                                                                                                            |                                                                                                                                                                                                                                                           |                                                                                       |                                                                               |         |                                          |
|-----|----------|-----------------------------------------------------------------------------------------------------------------------------------------------------------------------------|------------------------------------------------------------------------------------------------------------------------------------------------------------------------------------------------------------------------------------------------------------------------------------------------------------------------------------------------------------------------------------------------------------|-----------------------------------------------------------------------------------------------------------------------------------------------------------------------------------------------------------------------------------------------------------|---------------------------------------------------------------------------------------|-------------------------------------------------------------------------------|---------|------------------------------------------|
|     |          |                                                                                                                                                                             | Phylogenetic<br>s,Sequence<br>analysis,De-<br>novo<br>assembly,Wh<br>ole Genome<br>Resequencin<br>g,Alignment,<br>Systems<br>biology,Com<br>parative<br>genomics,SN<br>P<br>discovery,InD<br>el<br>discovery,Tra<br>nscription<br>Factor<br>analysis,Gen<br>omics,Popula<br>tion<br>genetics,Hom<br>ology,Metag<br>enomics,Rea<br>d<br>alignment,Str<br>uctural<br>variation,RN<br>A-Seq,Motif<br>analysis | Alignment,Assem<br>bly,Assembly<br>validation,Annota<br>tion,Multiple<br>sequence<br>alignment<br>viewer,Motif<br>analysis,Genetic<br>variation<br>annotation,Basec<br>aller,Genome<br>browser,Sample<br>Barcoding,Databa<br>se,Mapping,Visua<br>lization | <a href="http://seqanswers.com/wiki/Geneious">http://seqanswers.com/wiki/Geneious</a> | FASTA,FASTQ,GenBa<br>nk,SAM,Illumina,ELA<br>ND,CSFASTA/CSQUA<br>L (ABI SOLiD) |         | Sequence<br>Analysis,Syst<br>ems Biology |
| 314 | Geneious | Search, organize and analyze genomic and protein information of any size via desktop program that provides publication ready images to enhance the impact of your research. |                                                                                                                                                                                                                                                                                                                                                                                                            |                                                                                                                                                                                                                                                           |                                                                                       |                                                                               |         |                                          |
| 315 | ABMapper | Maps RNA-Seq reads to target genome considering possible multiple mapping locations and splice junctions                                                                    | Genomics,Tr<br>anscriptomic<br>s                                                                                                                                                                                                                                                                                                                                                                           | Mapping,Alignme<br>nt                                                                                                                                                                                                                                     | <a href="http://seqanswers.com/wiki/ABMapper">http://seqanswers.com/wiki/ABMapper</a> | SAM                                                                           | SAM,BED | Sequence<br>Analysis                     |
| 316 | ABBA     | Assembly Boosted By Amino acid sequence is a comparative gene assembler, which uses amino acid sequences from predicted proteins to help build a better assembly            | Genomic<br>Assembly                                                                                                                                                                                                                                                                                                                                                                                        | Assembly,Scaffol<br>ding                                                                                                                                                                                                                                  | <a href="http://seqanswers.com/wiki/ABBA">http://seqanswers.com/wiki/ABBA</a>         |                                                                               |         | Sequence<br>Analysis                     |

|     |                                   |                                                                                                                                                                                                                                          |                                            |                                                                                                               |                                                                                                                                                 |       |        |                                |
|-----|-----------------------------------|------------------------------------------------------------------------------------------------------------------------------------------------------------------------------------------------------------------------------------------|--------------------------------------------|---------------------------------------------------------------------------------------------------------------|-------------------------------------------------------------------------------------------------------------------------------------------------|-------|--------|--------------------------------|
| 317 | ALEXA-Seq                         | Alternative Expression Analysis by massively parallel RNA sequencing                                                                                                                                                                     | RNA-Seq Quantitation, Alternative Splicing |                                                                                                               | <a href="http://seqanswers.com/wiki/ALEXA-Seq">http://seqanswers.com/wiki/ALEXA-Seq</a>                                                         |       |        | Sequence Analysis              |
| 318 | ANNOVAR                           | ANNOVAR: Functional annotation of genetic variants from high-throughput sequencing data                                                                                                                                                  | Genomics, Genetics                         | Annotation, Variant Prioritization                                                                            | <a href="http://seqanswers.com/wiki/ANNOVAR">http://seqanswers.com/wiki/ANNOVAR</a>                                                             |       |        | Sequence Analysis              |
| 319 | Arf                               | arf is a genetic analysis program for sequencing data.                                                                                                                                                                                   |                                            |                                                                                                               | <a href="http://seqanswers.com/wiki/Arf">http://seqanswers.com/wiki/Arf</a>                                                                     |       |        | Sequence Analysis              |
| 320 | Array Suite (Array Studio/Server) | Array Studio is a complete analysis and visualization package for NextGen sequencing data, as well as other -OMIC data types. Array Server is a backend enterprise server for storage and analysis of -OMIC and NextGen sequencing data. | Genomics, SNP discovery, InDel discovery   | Mapping, Expression profiling                                                                                 | <a href="http://seqanswers.com/wiki/Array_Suite_%28Array_Studio/Server%29">http://seqanswers.com/wiki/Array_Suite_%28Array_Studio/Server%29</a> |       |        | Sequence Analysis              |
| 321 | ArrayExpressHTS                   | R-based pipeline for RNA-Seq data analysis.                                                                                                                                                                                              | RNA-Seq, RNA-Seq Quantitation              |                                                                                                               | <a href="http://seqanswers.com/wiki/ArrayExpressHTS">http://seqanswers.com/wiki/ArrayExpressHTS</a>                                             | FASTQ |        | Sequence Analysis              |
| 322 | ArrayStar                         | ArrayStar is an easy-to-use gene expression analysis software package that offers powerful visualization and statistical tools to help you analyze your microarray data.                                                                 | Gene Expression Analysis                   | Differentially expressed gene identification, Gene ontology analysis, Sequence variation analysis, Statistics | <a href="http://seqanswers.com/wiki/ArrayStar">http://seqanswers.com/wiki/ArrayStar</a>                                                         |       |        | Sequence Analysis, Microarrays |
| 323 | ASC                               | Empirical Bayes method to detect differential expression.                                                                                                                                                                                | RNA-Seq Quantitation                       | Empirical Bayes                                                                                               | <a href="http://seqanswers.com/wiki/ASC">http://seqanswers.com/wiki/ASC</a>                                                                     |       |        | Sequence Analysis              |
| 324 | ATAC                              | ATAC is a computational process for comparative mapping between two genome assemblies, or between two different genomes.                                                                                                                 |                                            | Assembly validation, Alignment                                                                                | <a href="http://seqanswers.com/wiki/ATAC">http://seqanswers.com/wiki/ATAC</a>                                                                   | FASTA | Custom | Sequence Analysis              |



|     |            |                                                                                                                                                                                                                                                                                                                                                                                                                                               |                                                     |                                                                                        |                                                                                           |                               |                 |                   |
|-----|------------|-----------------------------------------------------------------------------------------------------------------------------------------------------------------------------------------------------------------------------------------------------------------------------------------------------------------------------------------------------------------------------------------------------------------------------------------------|-----------------------------------------------------|----------------------------------------------------------------------------------------|-------------------------------------------------------------------------------------------|-------------------------------|-----------------|-------------------|
| 325 | Avadis NGS | Avadis NGS is a desktop software platform for alignment, analysis, visualization, and management of data generated by next-generation sequencing (NGS) platforms. It supports workflows for RNA-Seq, DNA-Seq, and ChIP-Seq analysis and is designed with the biologist in mind.                                                                                                                                                               | ChIP-Seq,DNA-Seq,RNA-Seq,Small RNA,Pathway analysis | Alignment,Quality Control,Sequence analysis,Visualization,Biological Contextualization | <a href="http://seqanswers.com/wiki/Avadis_NGS">http://seqanswers.com/wiki/Avadis_NGS</a> | SAM,BAM,BED,ELAND,FASTA,FASTQ |                 | Sequence Analysis |
| 326 | Batman     | Bayesian tool for methylation analysis (Batman) for analyzing methylated DNA immunoprecipitation (MeDIP) profiles                                                                                                                                                                                                                                                                                                                             | DNA methylation                                     |                                                                                        | <a href="http://seqanswers.com/wiki/Batman">http://seqanswers.com/wiki/Batman</a>         | GFF                           |                 | Sequence Analysis |
| 327 | BaySeq     | Identify differential expressed genes                                                                                                                                                                                                                                                                                                                                                                                                         | RNA-Seq Quantitation                                | Differentially expressed gene identification                                           | <a href="http://seqanswers.com/wiki/BaySeq">http://seqanswers.com/wiki/BaySeq</a>         |                               |                 | Sequence Analysis |
| 328 | BBSeq      | Tool for analyzing RNA-Seq data to analyze gene expression                                                                                                                                                                                                                                                                                                                                                                                    | RNA-Seq Quantitation                                |                                                                                        | <a href="http://seqanswers.com/wiki/BBSeq">http://seqanswers.com/wiki/BBSeq</a>           |                               |                 | Sequence Analysis |
| 329 | CNANorm    | A normalization method for Copy Number Aberration in cancer samples.                                                                                                                                                                                                                                                                                                                                                                          | Cancer biology,Copy number estimation,Genomics      | Mixture model,Peak detection,Normalization                                             | <a href="http://seqanswers.com/wiki/CNANorm">http://seqanswers.com/wiki/CNANorm</a>       | Delimited Text,SAM,BAM        | Delimited Text  | Sequence Analysis |
| 330 | BEDTools   | BEDTools is an extensive suite of utilities for comparing genomic features in BED format.                                                                                                                                                                                                                                                                                                                                                     | Genomics                                            | Mapping                                                                                | <a href="http://seqanswers.com/wiki/BEDTools">http://seqanswers.com/wiki/BEDTools</a>     | BED,BAM,GFF,VCF               | BED,BAM,GFF,VCF | Sequence Analysis |
| 331 | BFCounter  | BFCounter is a program for counting k-mers in DNA sequence data.                                                                                                                                                                                                                                                                                                                                                                              |                                                     | K-mer analysis                                                                         | <a href="http://seqanswers.com/wiki/BFCounter">http://seqanswers.com/wiki/BFCounter</a>   | FASTQ,(Compressed) FASTQ      |                 | Sequence Analysis |
| 332 | Biopieces  | The Biopieces are a collection of bioinformatics tools that can be pieced together in a very easy and flexible manner to perform both simple and complex tasks. The Biopieces work on a data stream in such a way that the data stream can be passed through several different Biopieces, each performing one specific task: modifying or adding records to the data stream, creating plots, or uploading data to databases and web services. | Genomics                                            | Alignment,Quality Control,Sequence analysis,Visualization                              | <a href="http://seqanswers.com/wiki/Biopieces">http://seqanswers.com/wiki/Biopieces</a>   |                               |                 | Sequence Analysis |

|     |                 |                                                                                                                                                                                                                                                   |                                                                            |                                                 |                                                                                                     |                                      |                 |                   |
|-----|-----------------|---------------------------------------------------------------------------------------------------------------------------------------------------------------------------------------------------------------------------------------------------|----------------------------------------------------------------------------|-------------------------------------------------|-----------------------------------------------------------------------------------------------------|--------------------------------------|-----------------|-------------------|
| 333 | BiQ Analyzer    | BiQ Analyzer is a software tool for easy visualization and quality control of DNA methylation data. With more than 2,000 downloads so far, BiQ Analyzer has become a standard tool for processing DNA methylation data from bisulfite sequencing. | Epigenomics, DNA methylation                                               |                                                 | <a href="http://seqanswers.com/wiki/BiQ_Analyzer">http://seqanswers.com/wiki/BiQ_Analyzer</a>       |                                      |                 | Sequence Analysis |
| 334 | Bismark         | Bismark is a tool to map bisulfite treated sequencing reads and perform methylation calling in a quick and easy-to-use fashion.                                                                                                                   | Epigenomics, Genomics, DNA methylation                                     | Bisulfite mapping, Mapping, Methylation Calling | <a href="http://seqanswers.com/wiki/Bismark">http://seqanswers.com/wiki/Bismark</a>                 | FASTQ, FASTA                         | SAM (or custom) | Sequence Analysis |
| 335 | BRCA-diagnostic | Computational screening test for BRCA1/2 mutants in human genomic DNA                                                                                                                                                                             | Personal genomics                                                          |                                                 | <a href="http://seqanswers.com/wiki/BRCA-diagnostic">http://seqanswers.com/wiki/BRCA-diagnostic</a> | FASTQ                                |                 | Sequence Analysis |
| 336 | Breakway        | Breakway is a suite of programs that take aligned genomic data and report structural variation breakpoints.                                                                                                                                       | Whole Genome Resequencing, Genomics, Structural variation, InDel discovery | Sequence analysis, Genetic variation annotation | <a href="http://seqanswers.com/wiki/Breakway">http://seqanswers.com/wiki/Breakway</a>               | BAM                                  | TXT             | Sequence Analysis |
| 337 | CABOG           | Celera Assembler is scientific software for DNA research.                                                                                                                                                                                         | De-novo assembly                                                           | Assembly                                        | <a href="http://seqanswers.com/wiki/CABOG">http://seqanswers.com/wiki/CABOG</a>                     | FASTA, QUAL, SFF, AFG, Trace Archive |                 | Sequence Analysis |
| 338 | CGA Tools       | Tools for viewing, manipulating and converting data from Complete Genomics                                                                                                                                                                        |                                                                            | Conversion                                      | <a href="http://seqanswers.com/wiki/CGA_Tools">http://seqanswers.com/wiki/CGA_Tools</a>             |                                      | SAM             | Sequence Analysis |

|     |                           |                                                                                                                                                                                                                                                    |                                                                                                                          |                                                                                                                                                                                 |                                                                                                                         |                                                                              |                                                       |                   |
|-----|---------------------------|----------------------------------------------------------------------------------------------------------------------------------------------------------------------------------------------------------------------------------------------------|--------------------------------------------------------------------------------------------------------------------------|---------------------------------------------------------------------------------------------------------------------------------------------------------------------------------|-------------------------------------------------------------------------------------------------------------------------|------------------------------------------------------------------------------|-------------------------------------------------------|-------------------|
| 339 | Chipster                  | User-friendly NGS data analysis software with built-in genome browser and workflow functionality. Chipster includes tools for ChIP-seq, RNA-seq, miRNA-seq and MeDIP-seq analysis, and functionality for exome-seq and CGH-seq will soon be added. | ChIP-Seq,RNA-Seq,MiRNA-Seq,MeDIP-Seq                                                                                     | QC,Filtering,Trimming,Mapping,Peak calling,Motif detection,Differential expression,Pathway analysis,Methylation analysis,Genomic region matching,Genome browser                 | <a href="http://seqanswers.com/wiki/Chipster">http://seqanswers.com/wiki/Chipster</a>                                   | FASTQ,SAM,BAM,BED,GTF                                                        | FASTQ,SAM,BAM,BED,GTF                                 | Sequence Analysis |
| 340 | CLCbio Genomics Workbench | De novo and reference assembly SNP and small indel detection and annotation.                                                                                                                                                                       | Genomics,Whole Genome Resequencing,De-novo assembly,SNP discovery,Indel discovery,ChIP-Seq,RNA-Seq,MiRNA,Transcriptomics | Mapping,Assembly,Alignment,Colospace,BLAST,Ab-initio gene prediction,Adapter Removal (software),Annotation,Assembly QC,Basespace,Bisulfite SNP calling,De Bruijn graph,Heatmaps | <a href="http://seqanswers.com/wiki/CLCbio_Genomics_Workbench">http://seqanswers.com/wiki/CLCbio_Genomics_Workbench</a> | FASTA,FASTQ,GenBank,SAM,BAM,Illumina Bustard,ELAND,CSFSTA/CSQUAL (ABI SOLiD) | FASTA,FASTQ,GFF,GenBank,SAM,BAM,ACE,Nexus,CSV,PDF,XLS | Sequence Analysis |
| 341 | CleaveLand                | A pipeline for using degradome data to find cleaved small RNA targets.                                                                                                                                                                             | MiRNA                                                                                                                    |                                                                                                                                                                                 | <a href="http://seqanswers.com/wiki/CleaveLand">http://seqanswers.com/wiki/CleaveLand</a>                               | BED,FASTA                                                                    |                                                       | Sequence Analysis |
| 342 | CNANorm                   | A normalization method for Copy Number Aberration in cancer samples.                                                                                                                                                                               | Cancer biology,Copy number estimation,Genomics                                                                           | Mixture model,Peak detection,Normalization                                                                                                                                      | <a href="http://seqanswers.com/wiki/CNANorm">http://seqanswers.com/wiki/CNANorm</a>                                     | Delimited Text,SAM,BAM                                                       | Delimited Text                                        | Sequence Analysis |

|     |           |                                                                                                                                                                                                                                                                                                          |                                                                                                                               |                                                                                                  |                                                                                         |              |                 |                   |
|-----|-----------|----------------------------------------------------------------------------------------------------------------------------------------------------------------------------------------------------------------------------------------------------------------------------------------------------------|-------------------------------------------------------------------------------------------------------------------------------|--------------------------------------------------------------------------------------------------|-----------------------------------------------------------------------------------------|--------------|-----------------|-------------------|
| 343 | ConDeTri  | ConDeTri is a content dependent read trimming software for Illumina/Solexa sequencing data                                                                                                                                                                                                               | RNA-Seq,DNA-Seq,Genomics                                                                                                      | Trimming                                                                                         | <a href="http://seqanswers.com/wiki/ConDeTri">http://seqanswers.com/wiki/ConDeTri</a>   | FASTQ        | FASTQ           | Sequence Analysis |
| 344 | CPTRA     | Integrated transcriptome analysis from Sanger, 454, Solexa, SOLiD, etc reads                                                                                                                                                                                                                             | RNA-Seq Alignment,RNA-Seq Quantitation                                                                                        |                                                                                                  | <a href="http://seqanswers.com/wiki/CPTRA">http://seqanswers.com/wiki/CPTRA</a>         |              |                 | Sequence Analysis |
| 345 | CRAC      | CRAC is a mapping software specialized for RNA-Seq data. It detects mutations, indels, splice or fusion junctions in each single read.                                                                                                                                                                   | Mapping,RNA Seq analysis,RNA-Seq Alignment,Alternative Splicing,Fusion genes,Fusion transcripts,SNP discovery,Indel discovery | Mapping,Read mapping,Burrows-Wheeler,FM-Index                                                    | <a href="http://seqanswers.com/wiki/CRAC">http://seqanswers.com/wiki/CRAC</a>           | (C)FAST(A/Q) | SAM (or custom) | Sequence Analysis |
| 346 | Cufflinks | Cufflinks assembles transcripts and estimates their abundances in RNA-Seq samples. It accepts aligned RNA-Seq reads and assembles the alignments into a parsimonious set of transcripts. Cufflinks then estimates the relative abundances of these transcripts based on how many reads support each one. | RNA-Seq Alignment,RNA-Seq Quantitation,Differential Expression,Alternative Splicing,Transcriptome assembly,RNA-Seq            | Transcript assembly,Mapping,Differentially expressed gene identification,Differential expression | <a href="http://seqanswers.com/wiki/Cufflinks">http://seqanswers.com/wiki/Cufflinks</a> | SAM          | GTF             | Sequence Analysis |

|     |                           |                                                                                                                                                                                                                                                                                                                                                                                                  |                                                      |                                                          |                                                                                                                         |                                                  |                                             |                   |
|-----|---------------------------|--------------------------------------------------------------------------------------------------------------------------------------------------------------------------------------------------------------------------------------------------------------------------------------------------------------------------------------------------------------------------------------------------|------------------------------------------------------|----------------------------------------------------------|-------------------------------------------------------------------------------------------------------------------------|--------------------------------------------------|---------------------------------------------|-------------------|
| 347 | CummeRbund                | Allows for persistent storage, access, exploration, and manipulation of Cufflinks high-throughput sequencing data. In addition, provides numerous plotting functions for commonly used visualizations.                                                                                                                                                                                           | RNA-Seq Quantitation                                 | Visualization                                            | <a href="http://seqanswers.com/wiki/CummeRbund">http://seqanswers.com/wiki/CummeRbund</a>                               |                                                  |                                             | Sequence Analysis |
| 348 | DeFuse                    | deFuse is a software package for gene fusion discovery using RNA-Seq data. The software uses clusters of discordant paired end alignments to inform a split read alignment analysis for finding fusion boundaries. The software also employs a number of heuristic filters in an attempt to reduce the number of false positives and produces a fully annotated output for each predicted fusion | Fusion genes, RNA-Seq, Fusion transcripts            |                                                          | <a href="http://seqanswers.com/wiki/DeFuse">http://seqanswers.com/wiki/DeFuse</a>                                       | FASTQ                                            |                                             | Sequence Analysis |
| 349 | DEGseq                    | an R package to identify differentially expressed genes or isoforms for RNA-seq data from different samples                                                                                                                                                                                                                                                                                      | RNA-Seq Quantitation                                 | Differentially expressed gene identification             | <a href="http://seqanswers.com/wiki/DEGseq">http://seqanswers.com/wiki/DEGseq</a>                                       |                                                  |                                             | Sequence Analysis |
| 350 | DESeq                     | DESeq is an R package to analyse count data from high-throughput sequencing assays such as RNA-Seq and test for differential expression.                                                                                                                                                                                                                                                         | RNA-Seq Quantitation, CHIP-Seq                       | Statistical testing, Sequencing Quality Control          | <a href="http://seqanswers.com/wiki/DESeq">http://seqanswers.com/wiki/DESeq</a>                                         | table with count data                            | table                                       | Sequence Analysis |
| 351 | DIAL                      | A computational pipeline for identifying single-base substitutions between two closely related genomes without the help of a reference genome.                                                                                                                                                                                                                                                   | SNP discovery, Comparative genomics                  |                                                          | <a href="http://seqanswers.com/wiki/DIAL">http://seqanswers.com/wiki/DIAL</a>                                           |                                                  |                                             | Sequence Analysis |
| 352 | DNA Chromatogram Explorer | DNA Chromatogram Explorer is a Windows Explorer clone dedicated to DNA sequence analysis and manipulation.                                                                                                                                                                                                                                                                                       |                                                      | Chromatogram management, Chromatogram viewer, Conversion | <a href="http://seqanswers.com/wiki/DNA_Chromatogram_Explorer">http://seqanswers.com/wiki/DNA_Chromatogram_Explorer</a> | DNA sequence, FASTA, SCF, ABI, GenBank, SEQ, TXT | DNA sequence analysis, FASTA, SCF, SEQ, TXT | Sequence Analysis |
| 353 | DNAA                      | DNAA (DNA Analysis) software for analysis of Next-Generation Sequencing data.                                                                                                                                                                                                                                                                                                                    | Structural variation, SNP discovery, DNA methylation | Statistics, Sequencing Quality Control, Simulation       | <a href="http://seqanswers.com/wiki/DNAA">http://seqanswers.com/wiki/DNAA</a>                                           | SAM, BAM                                         | DNA analysis                                | Sequence Analysis |
| 354 | DSAP                      | Automated multiple-task web service designed to provide a total solution to analyzing deep-sequencing small RNA datasets generated by next-generation sequencing technology                                                                                                                                                                                                                      | Small RNA transcriptome, MiRNA                       |                                                          | <a href="http://seqanswers.com/wiki/DSAP">http://seqanswers.com/wiki/DSAP</a>                                           | sequence tag file (read count, sequence)         | small RNA sequencing                        | Sequence Analysis |

|     |           |                                                                                                                                                                                                                                                                                                                                                                                                                                                                                                                                                                                                       |                                                                                    |                                                                                      |                                                                                         |                                                              |                                     |                   |
|-----|-----------|-------------------------------------------------------------------------------------------------------------------------------------------------------------------------------------------------------------------------------------------------------------------------------------------------------------------------------------------------------------------------------------------------------------------------------------------------------------------------------------------------------------------------------------------------------------------------------------------------------|------------------------------------------------------------------------------------|--------------------------------------------------------------------------------------|-----------------------------------------------------------------------------------------|--------------------------------------------------------------|-------------------------------------|-------------------|
| 355 | DSGseq    | This program aims to identify differentially spliced genes from two groups of RNA-seq samples.                                                                                                                                                                                                                                                                                                                                                                                                                                                                                                        | RNA-Seq, Differential Expression, Alternative Splicing                             | RNA-Seq analysis, Differential expression, Alternative Splicing, Statistical testing | <a href="http://seqanswers.com/wiki/DSGseq">http://seqanswers.com/wiki/DSGseq</a>       | SAM/BAM, Table with count data                               | Delimited Text                      | Sequence Analysis |
| 356 | E-miR     | Perl tools for processing miRNA sequencing data                                                                                                                                                                                                                                                                                                                                                                                                                                                                                                                                                       | Small RNA transcriptome, MiRNA                                                     |                                                                                      | <a href="http://seqanswers.com/wiki/E-miR">http://seqanswers.com/wiki/E-miR</a>         | small RNA, miRNA                                             | miRNA sequencing                    | Sequence Analysis |
| 357 | EdgeR     | edgeR is an R/Bioconductor software package for statistical analysis of replicated count data. Methods are designed for assessing differential expression in comparative RNA-Seq experiments, but are generally applicable to count data from other genome-scale platforms (ChIP-Seq, MeDIP-Seq, Tag-Seq, SAGE-Seq etc).                                                                                                                                                                                                                                                                              | RNA-Seq, RNA-Seq Quantitation, ChIP-Seq, Gene Expression Analysis, DNA methylation | Statistical testing                                                                  | <a href="http://seqanswers.com/wiki/EdgeR">http://seqanswers.com/wiki/EdgeR</a>         | RNA-Seq, genome, Table with count data                       | Table                               | Sequence Analysis |
| 358 | Epigenome | A bioinformatic pipeline that scores epigenetic alterations according to strength and significance and links them to potentially affected genes.                                                                                                                                                                                                                                                                                                                                                                                                                                                      | Epigenomics                                                                        | Bisulfite mapping                                                                    | <a href="http://seqanswers.com/wiki/Epigenome">http://seqanswers.com/wiki/Epigenome</a> | genes                                                        | epigenetic alterations              | Sequence Analysis |
| 359 | EpiGRAPH  | EpiGRAPH enables biologists to analyze genome and epigenome datasets with powerful statistical and machine learning methods. In a typical workflow, the user uploads a set of genomic regions of interest (e.g. experimentally mapped enhancers, hotspots of epigenetic regulation or sites exhibiting disease-specific alterations), and EpiGRAPH searches a large database of (epi-) genomic attributes for significant overlap and correlation with the regions in the input dataset. Furthermore, EpiGRAPH can predict the status of genomic regions that were not included in the input dataset. | Epigenomics                                                                        | Statistics, Machine Learning                                                         | <a href="http://seqanswers.com/wiki/EpiGRAPH">http://seqanswers.com/wiki/EpiGRAPH</a>   | genome, set of genomic regions, disease specific alterations | genome analysis, epigenome datasets | Sequence Analysis |

|     |        |                                                            |                                                                                                        |  |                                                                                   |                   |                      |                      |
|-----|--------|------------------------------------------------------------|--------------------------------------------------------------------------------------------------------|--|-----------------------------------------------------------------------------------|-------------------|----------------------|----------------------|
| 360 | ERANGE | ERANGE is a Python package for doing RNA-seq and ChIP-seq. | RNA-Seq<br>Alignment,R<br>NA-Seq<br>Quantitation,<br>ChIP-<br>Seq,Allele-<br>specific<br>transcription |  | <a href="http://seqanswers.com/wiki/ERANGE">http://seqanswers.com/wiki/ERANGE</a> | RNA-Seq, ChIP-seq | RNA-Seq,<br>ChIP-seq | Sequence<br>Analysis |
|-----|--------|------------------------------------------------------------|--------------------------------------------------------------------------------------------------------|--|-----------------------------------------------------------------------------------|-------------------|----------------------|----------------------|

|     |                                           |                                                                                                                                                                                                                                                                                                                                                                                                                                                                                                                         |                                                                                                                                                                                                                                                                                                                                             |  |                                                                                                                                                         |                                    |                                                                                                                                                                                 |                   |
|-----|-------------------------------------------|-------------------------------------------------------------------------------------------------------------------------------------------------------------------------------------------------------------------------------------------------------------------------------------------------------------------------------------------------------------------------------------------------------------------------------------------------------------------------------------------------------------------------|---------------------------------------------------------------------------------------------------------------------------------------------------------------------------------------------------------------------------------------------------------------------------------------------------------------------------------------------|--|---------------------------------------------------------------------------------------------------------------------------------------------------------|------------------------------------|---------------------------------------------------------------------------------------------------------------------------------------------------------------------------------|-------------------|
| 361 | ERGO Genome Analysis and Discovery System | ERGO provides a systems-biology informatics toolkit centered on comparative genomics to capture, query and visualize sequenced genomes. Building upon the most comprehensive genomic database available anywhere integrated with the largest collection of microbial metabolic and non-metabolic pathways and using Igenbio's proprietary algorithms, ERGO assigns functions to genes, integrates genes into pathways, and identifies previously unknown or mischaracterized genes, cryptic pathways and gene products. | reconstruction, Phylogenetics, Comparative genomics, SNP Annotation, SNP discovery, Alignment, Exome analysis, Metagenomics, Pathway analysis, Comparative transcriptomics, Functional Genomics, Gene Expression Analysis, Genome Wide Association Studies, Fusion finding, Fusion genes, Fusion transcripts, Sequence annotation, Sequence |  | <a href="http://seqanswers.com/wiki/ERGO_Genome_Analysis_and_Discovery_System">http://seqanswers.com/wiki/ERGO_Genome_Analysis_and_Discovery_System</a> | genomics, genomes, genome sequence | visualize sequenced genomes, collection of microbial metabolic pathways, collection of non-metabolic pathways, identify mischaracterized genes, cryptic pathways, gene products | Sequence Analysis |
| 362 | FDM                                       | Detects differential transcription in RNA-Seq data                                                                                                                                                                                                                                                                                                                                                                                                                                                                      | RNA-Seq Quantitation                                                                                                                                                                                                                                                                                                                        |  | <a href="http://seqanswers.com/wiki/FDM">http://seqanswers.com/wiki/FDM</a>                                                                             | RNA-Seq, SAM                       | differential transcription                                                                                                                                                      | Sequence Analysis |



|     |               |                                                                                                                                                                                                                                                                                                                                                                                                                                                                                                                                                                                                              |                                         |                    |                                                                                                 |                              |                     |                   |
|-----|---------------|--------------------------------------------------------------------------------------------------------------------------------------------------------------------------------------------------------------------------------------------------------------------------------------------------------------------------------------------------------------------------------------------------------------------------------------------------------------------------------------------------------------------------------------------------------------------------------------------------------------|-----------------------------------------|--------------------|-------------------------------------------------------------------------------------------------|------------------------------|---------------------|-------------------|
| 363 | Filter        | Produces a filtered version of an sRNA dataset, controlled by several user-defined criteria, including sequence length, abundance, complexity, transfer and ribosomal RNA removal.                                                                                                                                                                                                                                                                                                                                                                                                                           | General bioinformatics (pipeline)       | Filtering          | <a href="http://seqanswers.com/wiki/Filter">http://seqanswers.com/wiki/Filter</a>               | FASTA,FASTQ                  | FASTA               | Sequence Analysis |
| 364 | Flux          | FluxCapacitor s a computer program to predict splice form abundancies from reads of an RNA-seq experiment. FluxSimulator can generate simulated data for testing RNA-seq pipelines                                                                                                                                                                                                                                                                                                                                                                                                                           | RNA-Seq                                 | Simulation         | <a href="http://seqanswers.com/wiki/Flux">http://seqanswers.com/wiki/Flux</a>                   | RNA-Seq                      | RNA-Seq             | Sequence Analysis |
| 365 | FragGen eScan | Application for finding (fragmented) genes in short reads                                                                                                                                                                                                                                                                                                                                                                                                                                                                                                                                                    | Metagenomics                            |                    | <a href="http://seqanswers.com/wiki/FragGeneScan">http://seqanswers.com/wiki/FragGeneScan</a>   | FASTA                        | FASTA,tab separated | Sequence Analysis |
| 366 | FreClu        | a frequency-based, de novo short-read clustering method that organizes erroneous short sequences originating in a single abundant sequence into a tree structure; in this structure, each “child” sequence is considered to be stochastically derived from its more abundant “parent” sequence with one mutation through sequencing errors. The root node is the most frequently observed sequence that represents all erroneous reads in the entire tree, allowing the alignment of the reliable representative read to the genome without the risk of mapping erroneous reads to false-positive positions. | RNA-Seq Alignment                       | Mapping            | <a href="http://seqanswers.com/wiki/FreClu">http://seqanswers.com/wiki/FreClu</a>               | RNA-Seq                      | RNA-Seq alignment   | Sequence Analysis |
| 367 | Freebayes     | Bayesian genetic variant detector (SNPs, indels, MNPs)                                                                                                                                                                                                                                                                                                                                                                                                                                                                                                                                                       | Genomics                                |                    | <a href="http://seqanswers.com/wiki/Freebayes">http://seqanswers.com/wiki/Freebayes</a>         | BAM                          | VCF                 | Sequence Analysis |
| 368 | FusionCatcher | FusionCatcher searches for novel/known fusion genes, translocations, and chimeras in RNA-seq data (paired-end reads from Illumina NGS platforms like Solexa and HiSeq).                                                                                                                                                                                                                                                                                                                                                                                                                                      | RNA-Seq,Fusion finding                  | Alignment          | <a href="http://seqanswers.com/wiki/FusionCatcher">http://seqanswers.com/wiki/FusionCatcher</a> | FASTQ,(Compressed) FASTQ,SRA | text                | Sequence Analysis |
| 369 | FusionMap     | Detects fusion events in both single- and paired-end datasets from either RNA-Seq or gDNA-Seq studies and characterize fusion junctions at base-pair resolution.                                                                                                                                                                                                                                                                                                                                                                                                                                             | Fusion genes,Fusion transcripts         | Split-read         | <a href="http://seqanswers.com/wiki/FusionMap">http://seqanswers.com/wiki/FusionMap</a>         | FASTA,FASTQ                  | SAM                 | Sequence Analysis |
| 370 | FusionSeq     | Identifies fusion transcripts from paired end RNA-Seq data.                                                                                                                                                                                                                                                                                                                                                                                                                                                                                                                                                  | Fusion transcripts,RNA-Seq,Fusion genes | Alignment Analysis | <a href="http://seqanswers.com/wiki/FusionSeq">http://seqanswers.com/wiki/FusionSeq</a>         | MRF                          | GFR,BP              | Sequence Analysis |
| 371 | G-Mo.R-Seq    | G-Mo.R-Se is a method aimed at using RNA-Seq short reads to build de novo gene models.                                                                                                                                                                                                                                                                                                                                                                                                                                                                                                                       | RNA-Seq Alignment                       |                    | <a href="http://seqanswers.com/wiki/G-Mo.R-Seq">http://seqanswers.com/wiki/G-Mo.R-Seq</a>       |                              |                     | Sequence Analysis |

|     |                                |                                                                                                                                                                                                                                                                                                                                                               |                                        |                                                                                                                 |                                                                                                                                           |                                                                                             |                                                               |                   |
|-----|--------------------------------|---------------------------------------------------------------------------------------------------------------------------------------------------------------------------------------------------------------------------------------------------------------------------------------------------------------------------------------------------------------|----------------------------------------|-----------------------------------------------------------------------------------------------------------------|-------------------------------------------------------------------------------------------------------------------------------------------|---------------------------------------------------------------------------------------------|---------------------------------------------------------------|-------------------|
| 372 | GATK                           | The Genome Analysis Toolkit (GATK) is a structured programming framework designed to enable rapid development of efficient and robust analysis tools for next-generation DNA sequencers. The GATK solves the data management challenge by separating data access patterns from analysis algorithms, using the functional programming philosophy of Map/Reduce | SNP discovery                          | MapReduce, Programming Library, Localized reassembly/realignment                                                | <a href="http://seqanswers.com/wiki/GATK">http://seqanswers.com/wiki/GATK</a>                                                             | genome, DNA sequences, SAM                                                                  | genome analysis, VCF                                          | Sequence Analysis |
| 373 | Gbrowse                        | Genome Viewer                                                                                                                                                                                                                                                                                                                                                 |                                        | Visualization                                                                                                   | <a href="http://seqanswers.com/wiki/Gbrowse">http://seqanswers.com/wiki/Gbrowse</a>                                                       | genome                                                                                      | genome view                                                   | Sequence Analysis |
| 374 | GENE-Counter                   | GENE-counter is a computational pipeline for analyzing RNA-Sequencing (RNA-Seq) data for differential gene expression                                                                                                                                                                                                                                         | RNA-Seq                                |                                                                                                                 | <a href="http://seqanswers.com/wiki/GENE-Counter">http://seqanswers.com/wiki/GENE-Counter</a>                                             | gene, FASTA                                                                                 | RNA-Sequencing analysis, gene expression                      | Sequence Analysis |
| 375 | GeneProf                       | GeneProf is a web-based, graphical software suite and database resource for high-throughput-sequencing experiments (RNA-seq and ChIP-seq).                                                                                                                                                                                                                    | Functional Genomics, RNA-Seq, ChIP-Seq | Workflow, Quality Control, Alignment, Visualization, Peak finding, Differentially expressed gene identification | <a href="http://seqanswers.com/wiki/GeneProf">http://seqanswers.com/wiki/GeneProf</a>                                                     | FASTA, (Compressed) FASTA, (Compressed) FASTQ, Tab-delimited, Table with count data, Others | Images, XLS, TXT, FASTA, FASTQ, BED, WIG, Tab-delimited, HTML | Sequence Analysis |
| 376 | Genomatix Mining Station (GMS) | The Genomatix Mining Station (GMS) offers mapping of NGS reads onto genomes, transcriptomes and splice-junction libraries. It is a client-server based solution and can be controlled through an intuitive GUI or via command-line. It covers different tasks such as, as genomic positioning, SNP detection, splice analyses and genomic enrichments.        | RNA-Seq, SNP discovery, ChIP-Seq       | Assembly, Mapping, SNP calling, Genomic correlations                                                            | <a href="http://seqanswers.com/wiki/Genomatix_Mining_Station_%28GMS%29">http://seqanswers.com/wiki/Genomatix_Mining_Station_%28GMS%29</a> | solexa, Solexa with Probability, FASTA, FASTQ, EMBL, GenBank                                | FASTA, BED, SAM, BAM, GAF                                     | Sequence Analysis |

|     |               |                                                                                                                                                                                                                                                                                                                                 |                                                                                                                                                                                       |                                                       |                                                                                               |                                                    |                        |                   |
|-----|---------------|---------------------------------------------------------------------------------------------------------------------------------------------------------------------------------------------------------------------------------------------------------------------------------------------------------------------------------|---------------------------------------------------------------------------------------------------------------------------------------------------------------------------------------|-------------------------------------------------------|-----------------------------------------------------------------------------------------------|----------------------------------------------------|------------------------|-------------------|
| 377 | Genome Browse | A free genome browser for exploring sequencing pile-up and coverage data with numerous annotation tracks hosted on the cloud.                                                                                                                                                                                                   | Sequence analysis,DNA-Seq,Alignment,De novo sequencing,Exome analysis,Exome and whole genome variant detection,Genetics,Whole Genome Resequencing,Next Generation Sequencing,Genomics | Alignment viewer,Assembly visualization,Visualization | <a href="http://seqanswers.com/wiki/GenomeBrowse">http://seqanswers.com/wiki/GenomeBrowse</a> | genome, BAM                                        | genome sequencing      | Sequence Analysis |
| 378 | Genome Jack   | GenomeJack is a genome browser specialized in next-generation sequencing data. Advantages are intuitive interface and smooth drag'n drop response.                                                                                                                                                                              | Genomics,Personal genomics                                                                                                                                                            | Visualization                                         | <a href="http://seqanswers.com/wiki/GenomeJack">http://seqanswers.com/wiki/GenomeJack</a>     | genome, BAM,GTF,GFF,BED,BEDGraph,WIG,VCF,TSV,FASTA | genome sequencing      | Sequence Analysis |
| 379 | Genome ta     | Genometa is a Java based local bioinformatics program which allows rapid analysis of metagenomic short read datasets. Millions of short reads can be accurately analysed within minutes and visualised in the browser component. A large database of diverse bacteria and archaea has been constructed as a reference sequence. | Metagenomics,Genomics                                                                                                                                                                 | Mapping,Visualization                                 | <a href="http://seqanswers.com/wiki/Genometa">http://seqanswers.com/wiki/Genometa</a>         | FASTA,FASTQ                                        | SAM/BAM,Delimited Text | Sequence Analysis |
| 380 | Genome Tools  | The GenomeTools genome analysis system is a free collection of bioinformatics tools for genome informatics.1.3.6                                                                                                                                                                                                                | Genomics                                                                                                                                                                              |                                                       | <a href="http://seqanswers.com/wiki/GenomeTools">http://seqanswers.com/wiki/GenomeTools</a>   | genome                                             | genome analysis        | Sequence Analysis |

|     |              |                                                                                                                                                                                                                                                                                                                                                                                                                                                                                                                                    |                                                                                                                                                         |                                                                                                                                                      |                                                                                               |                                                                                                                  |                                                                                         |                   |
|-----|--------------|------------------------------------------------------------------------------------------------------------------------------------------------------------------------------------------------------------------------------------------------------------------------------------------------------------------------------------------------------------------------------------------------------------------------------------------------------------------------------------------------------------------------------------|---------------------------------------------------------------------------------------------------------------------------------------------------------|------------------------------------------------------------------------------------------------------------------------------------------------------|-----------------------------------------------------------------------------------------------|------------------------------------------------------------------------------------------------------------------|-----------------------------------------------------------------------------------------|-------------------|
| 381 | Genome View  | GenomeView is a next-generation stand-alone genome browser and editor initiated in the BSB group at VIB and currently developed at Broad Institute. It provides interactive visualization of sequences, annotation, multiple alignments, syntenic mappings, short read alignments and more. Many standard file formats are supported and new functionality can be added using a plugin system.                                                                                                                                     | Genomics, Comparative genomics, Comparative transcriptomics, Transcriptomics, Gene annotation retrieval, Quality Control, Sequencing, Sequence analysis | Visualization, Alignment viewer, Multiple sequence alignment viewer, Viewer, Genome browser                                                          | <a href="http://seqanswers.com/wiki/GenomeView">http://seqanswers.com/wiki/GenomeView</a>     | genome, (Compressed) FASTA, BAM, BED, BED Graph, Blast output, Clustalw, EMBL, FASTA, GFF, GTF, Multi-fasta, WIG | genome view, sequence visualization, multiple alignments, syntenic mappings, gff3, embl | Sequence Analysis |
| 382 | GenVision    | GenVision is a genomic visualization software package that is fully integrated with Lasergene and is designed to support easy generation of publication quality graphics and maps.                                                                                                                                                                                                                                                                                                                                                 | Genomics                                                                                                                                                | Visualization                                                                                                                                        | <a href="http://seqanswers.com/wiki/GenVision">http://seqanswers.com/wiki/GenVision</a>       | genomic                                                                                                          | genomic visualization                                                                   | Sequence Analysis |
| 383 | GMAP         | GMAP (Genomic Mapping and Alignment Program) for mRNA and EST Sequences.                                                                                                                                                                                                                                                                                                                                                                                                                                                           |                                                                                                                                                         | Alignment, Mapping                                                                                                                                   | <a href="http://seqanswers.com/wiki/GMAP">http://seqanswers.com/wiki/GMAP</a>                 | (Compressed) FASTQ                                                                                               | SAM (or custom)                                                                         | Sequence Analysis |
| 384 | Golden Helix | Golden Helix is a bioinformatic software provider and analytic service provider. The core of its business is about empowering scientists to discover more, discover it easier, and to come away with valid and reproducible bioinformatics results. The software, SNP & Variation Suite, is a stable platform for clever data manipulations, robust quality assurance, advanced statistical modeling, and compelling visual results in a genome browser environment of DNA Seq, Copy Number variation, SNP Chip, and RNA Seq data. | Epigenomics, Genomics, DNA-Seq, SNP discovery, Whole Genome Resequencing Analysis, Copy number estimation, Quality Control                              | Quality Control, Statistics, Statistical testing, Genome browser, Annotation, Filtering, Collapsing Methods, Variant Classification, Variant Mapping | <a href="http://seqanswers.com/wiki/Golden_Helix">http://seqanswers.com/wiki/Golden_Helix</a> | epigenomics, genomics, DNA-Seq, genome                                                                           | DNA-Seq, SNP discovery, genome resequencing analysis                                    | Sequence Analysis |

|     |                    |                                                                                                                                                                                                                                                                                                                     |                                                                                                                 |                                                                    |                                                                                                           |                                           |                                                                                         |                   |
|-----|--------------------|---------------------------------------------------------------------------------------------------------------------------------------------------------------------------------------------------------------------------------------------------------------------------------------------------------------------|-----------------------------------------------------------------------------------------------------------------|--------------------------------------------------------------------|-----------------------------------------------------------------------------------------------------------|-------------------------------------------|-----------------------------------------------------------------------------------------|-------------------|
| 385 | Goseq              | An R package to detect Gene Ontology (GO) categories and other categories of genes (such as KEGG pathways) that are over/under represented in an RNA-seq data.                                                                                                                                                      | RNA-Seq Quantitation                                                                                            | Gene Set Testing                                                   | <a href="http://seqanswers.com/wiki/Goseq">http://seqanswers.com/wiki/Goseq</a>                           | genes                                     | RNA-Seq                                                                                 | Sequence Analysis |
| 386 | Gowinda            | Gowinda: unbiased analysis of gene set enrichment for Genome Wide Association Studies                                                                                                                                                                                                                               | Genomics, Genome Wide Association Studies, Population genetics, Population Genomics, High-throughput sequencing | Gene set enrichment, Gene ontology, Genome wide association studys | <a href="http://seqanswers.com/wiki/Gowinda">http://seqanswers.com/wiki/Gowinda</a>                       | GTF,VCF,Pileup                            | gene analysis                                                                           | Sequence Analysis |
| 387 | GPSeq              | Analyze RNA-seq data to estimate gene and exon expression, identify differentially expressed genes, and differentially spliced exons                                                                                                                                                                                | RNA-Seq Quantitation                                                                                            |                                                                    | <a href="http://seqanswers.com/wiki/GPSeq">http://seqanswers.com/wiki/GPSeq</a>                           |                                           | RNA-Seq analysis, identify differentially expressed genes, differentially spliced exons | Sequence Analysis |
| 388 | Hairpin Annotation | Generates a secondary structure from an RNA sequence and highlights regions of interest using RNAplot                                                                                                                                                                                                               | General bioinformatics (pipeline)                                                                               |                                                                    | <a href="http://seqanswers.com/wiki/Hairpin_Annotation">http://seqanswers.com/wiki/Hairpin_Annotation</a> | Delimited Text                            | Various image file formats                                                              | Sequence Analysis |
| 389 | IGV                | The Integrative Genomics Viewer (IGV) is a high-performance visualization tool for interactive exploration of large, integrated datasets. It supports a wide variety of data types and format, including short-read alignments in the SAM/BAM format. Data can be viewed from local files or over the web via http. | Genomics                                                                                                        | Visualization                                                      | <a href="http://seqanswers.com/wiki/IGV">http://seqanswers.com/wiki/IGV</a>                               | BAM,SAM,GOBY,BED,GFF,GTF,PSL,CN,GCT,FASTA | genomic view                                                                            | Sequence Analysis |

|     |                            |                                                                                                                                                                                                                                                                                                                                                                                                                                                                                                                                                                                                                                                                        |                                                                                                                                                                                             |                                                             |                                                                                                                           |                                                                  |                                                                     |                   |
|-----|----------------------------|------------------------------------------------------------------------------------------------------------------------------------------------------------------------------------------------------------------------------------------------------------------------------------------------------------------------------------------------------------------------------------------------------------------------------------------------------------------------------------------------------------------------------------------------------------------------------------------------------------------------------------------------------------------------|---------------------------------------------------------------------------------------------------------------------------------------------------------------------------------------------|-------------------------------------------------------------|---------------------------------------------------------------------------------------------------------------------------|------------------------------------------------------------------|---------------------------------------------------------------------|-------------------|
| 390 | Ingenuity Variant Analysis | Ingenuity Variant Analysis is a web application that helps researchers studying human disease to identify causal variants from human resequencing data in just minutes. Ingenuity Variant Analysis combines analytical tools and integrated content to help you rapidly identify and prioritize variants by drilling down to a small, targeted subset of compelling variants based both upon published biological evidence and your own knowledge of disease biology. With Variant Analysis, you can interrogate your variants from multiple biological perspectives, explore different biological hypotheses, and identify the most promising variants for follow-up. | Genomics, Genetics, Next Generation Sequencing, Exome and Whole genome variant detection, Whole Genome Resequencing Analysis, Exome analysis, Causal Variant Detection, Targeted Sequencing | Biological Interpretation and Analysis of DNA Sequence Data | <a href="http://seqanswers.com/wiki/Ingenuity_Variant_Analysis">http://seqanswers.com/wiki/Ingenuity_Variant_Analysis</a> | genomics, genetics, sequencing, exome, whole genome resequencing | genome resequencing analysis, exome analysis, DNA sequence analysis | Sequence Analysis |
| 391 | Integrated Genome Browser  | Visualization software for next-generation genomics                                                                                                                                                                                                                                                                                                                                                                                                                                                                                                                                                                                                                    | Genomics                                                                                                                                                                                    | Visualization                                               | <a href="http://seqanswers.com/wiki/Integrated_Genome_Browser">http://seqanswers.com/wiki/Integrated_Genome_Browser</a>   | BAM,BED,PSL,GFF                                                  | various image file formats                                          | Sequence Analysis |

|     |           |                                                                                                                                                                                                                                               |                                                                                                              |                                                                                                                                                   |                                                                                         |                                |                                    |                   |
|-----|-----------|-----------------------------------------------------------------------------------------------------------------------------------------------------------------------------------------------------------------------------------------------|--------------------------------------------------------------------------------------------------------------|---------------------------------------------------------------------------------------------------------------------------------------------------|-----------------------------------------------------------------------------------------|--------------------------------|------------------------------------|-------------------|
| 392 | IOmics    | iOmics is a cloud based workflow analysis framework for managing, analyzing and visualizing NGS data                                                                                                                                          | Genomics, Transcriptomics, Epigenomics, RNA-Seq, Exome and Whole genome variant detection                    | Genome Alignment, Assembly, Ab-initio gene prediction, Genetic variation annotation, Exome analysis, ChIP seq, MiRNA analysis (Ref and Ab-initio) | <a href="http://seqanswers.com/wiki/Iomics">http://seqanswers.com/wiki/Iomics</a>       | genomics, epigenomics, RNA-Seq | NGS data visualization             | Sequence Analysis |
| 393 | Kissnp    | kisSnp compares two sets of NGS raw reads, detecting Single Nucleotide Polymorphism occurring between the two sets. The two sets typically come from the sequencing of two individuals from the same species or from closely related species. | Comparative genomics, Comparative transcriptomics, Gene annotation retrieval, SNP discovery, InDel discovery | Micro assembly, De Bruijn graph                                                                                                                   | <a href="http://seqanswers.com/wiki/Kissnp">http://seqanswers.com/wiki/Kissnp</a>       | FASTA                          | FASTA                              | Sequence Analysis |
| 394 | LASTZ     | A tool for (1) aligning two DNA sequences, and (2) inferring appropriate scoring parameters automatically                                                                                                                                     | Genomics                                                                                                     | Mapping, Alignment                                                                                                                                | <a href="http://seqanswers.com/wiki/LASTZ">http://seqanswers.com/wiki/LASTZ</a>         | FASTA, HSX, others             | LAV, AXT, MAFF, SAM, CIGAR, others | Sequence Analysis |
| 395 | MapDamage | Identifies and quantifies DNA damage patterns in ancient DNA                                                                                                                                                                                  | Ancient DNA, DNA-Seq                                                                                         | Quality Control, Statistical Modelling                                                                                                            | <a href="http://seqanswers.com/wiki/MapDamage">http://seqanswers.com/wiki/MapDamage</a> | SAM, BAM                       |                                    | Sequence Analysis |

|     |             |                                                                                                                                          |                                                           |                                                                                         |                                                                                             |                                                                       |                                                          |                   |
|-----|-------------|------------------------------------------------------------------------------------------------------------------------------------------|-----------------------------------------------------------|-----------------------------------------------------------------------------------------|---------------------------------------------------------------------------------------------|-----------------------------------------------------------------------|----------------------------------------------------------|-------------------|
| 396 | MeV         | Visualization of genomic data, Differential Gene Expression based on DEGseq, DESeq and edgeR                                             | RNA-Seq                                                   | Clustering, Visualization, Classification, Differentially expressed gene identification | <a href="http://seqanswers.com/wiki/MeV">http://seqanswers.com/wiki/MeV</a>                 |                                                                       | genomic data visualization, differential gene expression | Sequence Analysis |
| 397 | MiRanalyzer | Web-server for identifying and analyzing miRNA in next-gen sequencing experiments                                                        | MiRNA                                                     |                                                                                         | <a href="http://seqanswers.com/wiki/MiRanalyzer">http://seqanswers.com/wiki/MiRanalyzer</a> |                                                                       | miRNA analysis                                           | Sequence Analysis |
| 398 | MiRCat      | Predicts mature miRNAs and their precursors from an sRNA dataset and a genome.                                                           | General bioinformatics (pipeline)                         | MiRNA Prediction                                                                        | <a href="http://seqanswers.com/wiki/MiRCat">http://seqanswers.com/wiki/MiRCat</a>           | FASTA, FASTQ                                                          | csv,txt,FASTA, Various image file formats                | Sequence Analysis |
| 399 | MiRDeep     | Discovering known and novel miRNAs from deep sequencing data                                                                             | MiRNA                                                     |                                                                                         | <a href="http://seqanswers.com/wiki/MiRDeep">http://seqanswers.com/wiki/MiRDeep</a>         |                                                                       | miRNA sequencing data                                    | Sequence Analysis |
| 400 | MiRNAkey    | A software pipeline for the analysis of microRNA Deep Sequencing data                                                                    | MiRNA                                                     |                                                                                         | <a href="http://seqanswers.com/wiki/MiRNAkey">http://seqanswers.com/wiki/MiRNAkey</a>       | FASTQ, FASTA                                                          | TXT                                                      | Sequence Analysis |
| 401 | MiRProf     | Determines normalised expression levels of sRNAs matching known miRNAs in miRBase.                                                       | General bioinformatics (pipeline)                         | MiRNA profiling                                                                         | <a href="http://seqanswers.com/wiki/MiRProf">http://seqanswers.com/wiki/MiRProf</a>         | FASTA, FASTQ                                                          | CSV                                                      | Sequence Analysis |
| 402 | MirTools    | Web server for microRNA profiling and discovery based on high-throughput sequencing                                                      | Small RNA transcriptome, MiRNA                            |                                                                                         | <a href="http://seqanswers.com/wiki/MirTools">http://seqanswers.com/wiki/MirTools</a>       | Short read tag with count                                             | Detailed annotation                                      | Sequence Analysis |
| 403 | MMSEQ       | Pipeline and methodology for simultaneously estimating isoform expression and allelic imbalance in diploid organisms using RNA-seq data. | Allele-specific transcription                             |                                                                                         | <a href="http://seqanswers.com/wiki/MMSEQ">http://seqanswers.com/wiki/MMSEQ</a>             | RNA-Seq data, FASTQ                                                   | allele transcription                                     | Sequence Analysis |
| 404 | MochiView   | Hybrid genome browser and motif visualization/analysis/management desktop software.                                                      | Genomics, ChIP-Seq, ChIP-on-chip, RNA-Seq, Motif analysis | Genome browser, Motif analysis                                                          | <a href="http://seqanswers.com/wiki/MochiView">http://seqanswers.com/wiki/MochiView</a>     | Custom, WIG, BED, GFF, FASTA, MEME, Bioprosector, custom Motif format | Varied                                                   | Sequence Analysis |



|     |           |                                                                                                                                                                                                                                                                                                                                                                                                                                                                                                                                              |                                         |                                            |                                                                                         |                 |                              |                   |
|-----|-----------|----------------------------------------------------------------------------------------------------------------------------------------------------------------------------------------------------------------------------------------------------------------------------------------------------------------------------------------------------------------------------------------------------------------------------------------------------------------------------------------------------------------------------------------------|-----------------------------------------|--------------------------------------------|-----------------------------------------------------------------------------------------|-----------------|------------------------------|-------------------|
| 405 | MUMmer    | MUMmer is a modular system for the rapid whole genome alignment of finished or draft sequence. Basically it is a ultra-fast alignment of large-scale DNA and protein sequences                                                                                                                                                                                                                                                                                                                                                               | Genomics, Transcriptomics               | Alignment, Mapping                         | <a href="http://seqanswers.com/wiki/MUMmer">http://seqanswers.com/wiki/MUMmer</a>       | FASTA           | delta                        | Sequence Analysis |
| 406 | Mutoscope | Mutoscope is a software suite designed to analyze data from high throughput sequencing of PCR amplicons, with an emphasis on normal-tumor comparison for the accurate and sensitive identification of low prevalence mutations.                                                                                                                                                                                                                                                                                                              | Cancer biology                          | Somatic variant calling, Analysis Pipeline | <a href="http://seqanswers.com/wiki/Mutoscope">http://seqanswers.com/wiki/Mutoscope</a> | FASTQ, SAM/BAM  | .bam, .vcf, other            | Sequence Analysis |
| 407 | MuTect    | MuTect is a method developed at the Broad Institute for the reliable and accurate identification of somatic point mutations in next generation sequencing data of cancer genomes.                                                                                                                                                                                                                                                                                                                                                            |                                         | SNP calling                                | <a href="http://seqanswers.com/wiki/MuTect">http://seqanswers.com/wiki/MuTect</a>       | cancer genomes  | cancer genomes mutations     | Sequence Analysis |
| 408 | Myrna     | Myrna is a cloud computing tool for calculating differential gene expression in large RNA-seq datasets.                                                                                                                                                                                                                                                                                                                                                                                                                                      | RNA-Seq Quantitation, RNA-Seq Alignment | Hadoop, MapReduce                          | <a href="http://seqanswers.com/wiki/Myrna">http://seqanswers.com/wiki/Myrna</a>         | RNA-Seq dataset | differential gene expression | Sequence Analysis |
| 409 | Olego     | Olego is a program specifically designed for de novo spliced mapping of mRNA-seq reads. Olego adopts a seeding and extension scheme, and does not rely on a separate external mapper. It achieves high sensitivity of junction detection by using very small seeds (12-14 nt), efficiently mapped using Burrows-Wheeler transform (BWT) and FM-index. This also makes it particularly sensitive for discovering small exons. It is implemented in C++ with full support of multiple threading, to allow fast processing of large-scale data. | Genomics, RNA-Seq, RNA-Seq Alignment    | Mapping, Alignment                         | <a href="http://seqanswers.com/wiki/Olego">http://seqanswers.com/wiki/Olego</a>         | FASTA, FASTQ    | SAM, BED                     | Sequence Analysis |

|     |                       |                                                                                                                                                                                                                                                                                                                                                                                                                                                                                                                                                                                                                                                                                                                                                                                                                                                                                                                                                                                                                                          |                                                                                                                                                           |           |                                                                                                                 |            |                       |                                |
|-----|-----------------------|------------------------------------------------------------------------------------------------------------------------------------------------------------------------------------------------------------------------------------------------------------------------------------------------------------------------------------------------------------------------------------------------------------------------------------------------------------------------------------------------------------------------------------------------------------------------------------------------------------------------------------------------------------------------------------------------------------------------------------------------------------------------------------------------------------------------------------------------------------------------------------------------------------------------------------------------------------------------------------------------------------------------------------------|-----------------------------------------------------------------------------------------------------------------------------------------------------------|-----------|-----------------------------------------------------------------------------------------------------------------|------------|-----------------------|--------------------------------|
| 410 | PALMA                 | We present a novel approach based on large margin learning that combines accurate splice site predictions with common sequence alignment techniques. By solving a convex optimization problem, our algorithm -- called PALMA -- tunes the parameters of the model such that true alignments score higher than other alignments. We study the accuracy of alignments of mRNAs containing artificially generated micro-exons to genomic DNA. In a carefully designed experiment, we show that our algorithm accurately identifies the intron boundaries as well as boundaries of the optimal local alignment. It outperforms all other methods: for 5702 artificially shortened EST sequences from <i>C. elegans</i> and human it correctly identifies the intron boundaries in all except two cases. The best other method is a recently proposed method called exalin which misaligns 37 of the sequences. Our method also demonstrates robustness to mutations, insertions and deletions, retaining accuracy even at high noise levels. | RNA-Seq Alignment                                                                                                                                         | Alignment | <a href="http://seqanswers.com/wiki/PALMA">http://seqanswers.com/wiki/PALMA</a>                                 |            | RNA alignment         | Sequence Analysis              |
| 411 | Partek Genomics Suite | Easy to use software providing A to Z analysis for all Next Generation Sequencing and Microarray data.                                                                                                                                                                                                                                                                                                                                                                                                                                                                                                                                                                                                                                                                                                                                                                                                                                                                                                                                   | Allele-specific transcription, RNA-Seq Quantitation, Epigenomics, Functional Genomics,ChIP-Seq,Alternative Splicing,SNP discovery,Small RNA transcriptome |           | <a href="http://seqanswers.com/wiki/Partek_Genomics_Suite">http://seqanswers.com/wiki/Partek_Genomics_Suite</a> | sequencing | microarray data       | Sequence Analysis, Microarrays |
| 412 | PatMaN                | Patman searches for short patterns in large DNA databases, allowing for approximate matches. It is optimized for searching for many small pattern at the same time, for example microarray probes.                                                                                                                                                                                                                                                                                                                                                                                                                                                                                                                                                                                                                                                                                                                                                                                                                                       |                                                                                                                                                           | Mapping   | <a href="http://seqanswers.com/wiki/PatMaN">http://seqanswers.com/wiki/PatMaN</a>                               | DNA data   | DNA matching, mapping | Sequence Analysis, Microarrays |

|     |                |                                                                                                                                                                                                                                                                                                                                                                                                                                            |                                                                                                       |                                                                                                                                                                                                                                       |                                                                                                   |                                                                                                                                                                                                                                                                                             |                     |                   |
|-----|----------------|--------------------------------------------------------------------------------------------------------------------------------------------------------------------------------------------------------------------------------------------------------------------------------------------------------------------------------------------------------------------------------------------------------------------------------------------|-------------------------------------------------------------------------------------------------------|---------------------------------------------------------------------------------------------------------------------------------------------------------------------------------------------------------------------------------------|---------------------------------------------------------------------------------------------------|---------------------------------------------------------------------------------------------------------------------------------------------------------------------------------------------------------------------------------------------------------------------------------------------|---------------------|-------------------|
| 413 | Pipeline Pilot | Analysis and workflow development of Next Generation Sequencing and gene expression.                                                                                                                                                                                                                                                                                                                                                       | Next Generation Sequencing, Gene expression, Sequence analysis, SNP discovery                         | General bioinformatics, Mapping, De-novo assembly, Sequence analysis, Variant detection, Gene expression analysis, RNA-Seq analysis, CHIP-Seq analysis, Genomics, Comparative genomics, Whole genome resequencing, Sequence alignment | <a href="http://seqanswers.com/wiki/Pipeline_Pilot">http://seqanswers.com/wiki/Pipeline_Pilot</a> | Bowtie, BreakDancer Max, BWA, CisGenome, CNV-seq, Cufflinks, FASTQC, GATK, Integrative Genomics Viewer, MACS, Mapreads, MIRA3, MUMmer, SAMtools, snpEff, Tablet, TopHat, Velvet, tabix, Artemis, BioJava, BioPerl, BLAST, ClustalW, EMBOSS, HMME R, Jalview, MUSCLE, primer3, PROSITE, sim4 | Circos, GBrowse2    | Sequence Analysis |
| 414 | Qseq           | QSeq is DNASTAR's Next-Gen application for RNA-Seq, CHIP-Seq, and miRNA alignment and analysis.                                                                                                                                                                                                                                                                                                                                            | CHIP-Seq, RNA-Seq, MiRNA                                                                              | Integrated Solution, Alignment, Visualization, Protein Binding Peak Detection                                                                                                                                                         | <a href="http://seqanswers.com/wiki/Qseq">http://seqanswers.com/wiki/Qseq</a>                     | RNA-Seq, CHIP-seq, miRNA alignment                                                                                                                                                                                                                                                          | alignment, analysis | Sequence Analysis |
| 415 | Rdiff          | rDiff is an open source tool for accurate detection of differential RNA processing from RNA-Seq data. It implements two statistical tests to detect changes of the RNA processing between two samples. rDiff.parametric is a powerful test, which can be applied for well annotated organisms to detect changes in the relative abundance of isoforms. rDiff.nonparametric is an alternative when the annotation is incomplete or missing. | RNA-Seq Alignment, Differential RNA processing regulation, Alternative Splicing, RNA-Seq, Transcripts | Statistical testing                                                                                                                                                                                                                   | <a href="http://seqanswers.com/wiki/Rdiff">http://seqanswers.com/wiki/Rdiff</a>                   | SAM/BAM, GFF3                                                                                                                                                                                                                                                                               | Tab-delimited file  | Sequence Analysis |

|     |         |                                                                                                                                                                                                                                                                                                                                                                                                                                                                                                                                                                                                                                                                                                                                   |                                                                              |                                                       |                                                                                     |                                     |                      |                   |
|-----|---------|-----------------------------------------------------------------------------------------------------------------------------------------------------------------------------------------------------------------------------------------------------------------------------------------------------------------------------------------------------------------------------------------------------------------------------------------------------------------------------------------------------------------------------------------------------------------------------------------------------------------------------------------------------------------------------------------------------------------------------------|------------------------------------------------------------------------------|-------------------------------------------------------|-------------------------------------------------------------------------------------|-------------------------------------|----------------------|-------------------|
| 416 | Contra  | Copy number analysis for exome-sequencing / targeted-resequencing. Two methods of analysis available: Case vs Control, or Case vs Baseline. Function available for creating a baseline from multiple samples.                                                                                                                                                                                                                                                                                                                                                                                                                                                                                                                     | Next Generation Sequencing, Cancer biology, Genomics, Copy number estimation |                                                       | <a href="http://seqanswers.com/wiki/Contra">http://seqanswers.com/wiki/Contra</a>   | BAM,BED                             | VCF,Tab-delimited    | Sequence Analysis |
| 417 | Bis-SNP | BisSNP is a package based on the Genome Analysis Toolkit (GATK) map-reduce framework for genotyping in bisulfite treated massively parallel sequencing (Bisulfite-seq, NOME-seq and RRBS) on Illumina platform. It uses bayesian inference with either manually specified or automatically estimated methylation probabilities of different cytosine context(not only CpG, CHH, CHG in Bisulfite-seq, but also GCH et.al. in other bisulfite treated sequencing) to determine genotypes and methylation levels simultaneously.                                                                                                                                                                                                    | SNP discovery, Genotyping, DNA methylation, Bisulfite Sequencing             | Bisulfite SNP calling, Methylation Calling, MapReduce | <a href="http://seqanswers.com/wiki/Bis-SNP">http://seqanswers.com/wiki/Bis-SNP</a> | BAM                                 | VCF,BED,BEDGRAPH,WIG | Sequence Analysis |
| 418 | Bison   | Bison allows users with access to a computer cluster to rapidly align whole-genome bisulfite sequencing or RRBS reads. It can align both directional and non-directional libraries and uses bowtie2.                                                                                                                                                                                                                                                                                                                                                                                                                                                                                                                              | Epigenomics, Bisulfite Sequencing, DNA methylation                           | Bisulfite mapping, Mapping, Methylation Calling       | <a href="http://seqanswers.com/wiki/Bison">http://seqanswers.com/wiki/Bison</a>     | (Compressed) FASTQ,FASTQ            | BAM,BEDGRAPH         | Sequence Analysis |
| 419 | BRAT    | accurate and efficient tool for mapping short reads obtained from the Illumina Genome Analyzer following sodium bisulfite conversion. Both single and paired ends are supported.,We present a new, accurate and efficient tool for mapping short reads obtained from the Illumina Genome Analyzer following sodium bisulfite conversion. Our tool, BRAT, supports single and paired-end reads and handles input files containing reads and mates of different lengths. BRAT is faster, maps more unique paired-end reads and has higher accuracy than existing programs. The software package includes tools to end-trim low quality bases of the reads and to report nucleotide counts for mapped reads on the reference genome. | Epigenomics, DNA methylation                                                 | Bisulfite mapping, Mapping                            | <a href="http://seqanswers.com/wiki/BRAT">http://seqanswers.com/wiki/BRAT</a>       | genome, sodium bisulfite conversion | genome analysis      | Sequence Analysis |

|     |                 |                                                                                                                                                                                                                                                                                                                                                                                                                                                                                                                                                                                                                                                                                                                                                                                                                                                                                                                                                                                                                                                                                                                                                  |                                                    |                            |                                                                                 |                 |                      |                   |
|-----|-----------------|--------------------------------------------------------------------------------------------------------------------------------------------------------------------------------------------------------------------------------------------------------------------------------------------------------------------------------------------------------------------------------------------------------------------------------------------------------------------------------------------------------------------------------------------------------------------------------------------------------------------------------------------------------------------------------------------------------------------------------------------------------------------------------------------------------------------------------------------------------------------------------------------------------------------------------------------------------------------------------------------------------------------------------------------------------------------------------------------------------------------------------------------------|----------------------------------------------------|----------------------------|---------------------------------------------------------------------------------|-----------------|----------------------|-------------------|
| 420 | BSMAP           | short reads mapping software for bisulfite sequencing, Bisulfite sequencing is a powerful technique to study DNA cytosine methylation. Bisulfite treatment followed by PCR amplification specifically converts unmethylated cytosines to thymine. Coupled with next generation sequencing technology, it is able to detect the methylation status of every cytosine in the genome. However, mapping high-throughput bisulfite reads to the reference genome remains a great challenge due to the increased searching space, reduced complexity of bisulfite sequence, asymmetric cytosine to thymine alignments, and multiple CpG heterogeneous methylation. We developed an efficient bisulfite reads mapping algorithm BSMAP to address the above issues. BSMAP combines genome hashing and bitwise masking to achieve fast and accurate bisulfite mapping. Compared with existing bisulfite mapping approaches, BSMAP is faster, more sensitive and more flexible. BSMAP is the first general-purpose bisulfite mapping software. It is able to map high-throughput bisulfite reads at whole genome level with feasible memory and CPU usage. | DNA methylation                                    | Mapping, Bisulfite mapping | <a href="http://seqanswers.com/wiki/BSMAP">http://seqanswers.com/wiki/BSMAP</a> | FASTA, FASTQ    | SOAP mapping format  | Sequence Analysis |
| 421 | BSSim           | BSSim: Bisulfite sequencing simulator for next-generation sequencing.                                                                                                                                                                                                                                                                                                                                                                                                                                                                                                                                                                                                                                                                                                                                                                                                                                                                                                                                                                                                                                                                            | DNA methylation, Bisulfite Sequencing              | Simulation                 | <a href="http://seqanswers.com/wiki/BSSim">http://seqanswers.com/wiki/BSSim</a> | FASTA           | FASTQ, SAM, Ref      | Sequence Analysis |
| 422 | BiQ Analyzer HT | BiQ Analyzer HT is an enhanced version of BiQ Analyzer that provides extensive support for high-throughput bisulfite sequencing. BiQ Analyzer HT facilitates the processing, quality control and initial analysis of single-basepair resolution DNA methylation data. It was developed for deep bisulfite sequencing of one or more loci using the Roche 454 platform, but it easily extends to other sequencing platforms. BiQ Analyzer HT features a biologist-friendly graphical user interface, a fast alignment algorithm and a variety of ways to visualize DNA methylation data.                                                                                                                                                                                                                                                                                                                                                                                                                                                                                                                                                          | Epigenomics, DNA methylation, Bisulfite Sequencing |                            |                                                                                 | DNA methylation | bisulfite sequencing | Sequence Analysis |

|     |             |                                                                                                                                                                                                                                                                                                                                                                                                                                                                                                                                                                                                                                                                                                                                                                       |                                                                                                        |                                                  |                                                                                             |                                    |                            |                   |
|-----|-------------|-----------------------------------------------------------------------------------------------------------------------------------------------------------------------------------------------------------------------------------------------------------------------------------------------------------------------------------------------------------------------------------------------------------------------------------------------------------------------------------------------------------------------------------------------------------------------------------------------------------------------------------------------------------------------------------------------------------------------------------------------------------------------|--------------------------------------------------------------------------------------------------------|--------------------------------------------------|---------------------------------------------------------------------------------------------|------------------------------------|----------------------------|-------------------|
| 423 | GSNAP       | GSNAP can align both single-end and paired-end reads as short as 14 nt and of arbitrarily long length. It can detect short- and long-distance splicing, including interchromosomal splicing, in individual reads using probabilistic models or a database of known splice sites. Our program also permits SNP-tolerant alignment to a reference space of all possible combinations of major and minor alleles, and can align reads from bisulfite treated DNA for the study of methylation state.                                                                                                                                                                                                                                                                     | RNA-Seq Alignment, DNA methylation                                                                     | Mapping, Bisulfite mapping                       | <a href="http://seqanswers.com/wiki/GSNAP">http://seqanswers.com/wiki/GSNAP</a>             | RNA-Seq Alignment, DNA methylation | Mapping, Bisulfite mapping | Sequence Analysis |
| 424 | Kismeth     | Web-based tool for bisulfite sequencing analysis                                                                                                                                                                                                                                                                                                                                                                                                                                                                                                                                                                                                                                                                                                                      | DNA methylation, Epigenomics                                                                           | Bisulfite mapping                                | <a href="http://seqanswers.com/wiki/Kismeth">http://seqanswers.com/wiki/Kismeth</a>         | DNA methylation, Epigenomics       | Bisulfite mapping          | Sequence Analysis |
| 425 | Methpipe    | The MethPipe software package is a computational pipeline for analyzing bisulfite sequencing data (BS-seq, WGBS and RRBS). MethPipe provides tools for mapping bisulfite sequencing read and estimating methylation levels at individual cytosine sites. Additionally, MethPipe includes tools for identifying higher-level methylation features, such as hypo-methylated regions (HMR), partially methylated domains (PMD), hyper-methylated regions (HyperMR), and allele-specific methylated regions (AMR).                                                                                                                                                                                                                                                        | Epigenomics, DNA methylation, Bisulfite Sequencing, High-level methylation feature, epigenetic domains | Bisulfite mapping, Hidden Markov Model, Workflow | <a href="http://seqanswers.com/wiki/Methpipe">http://seqanswers.com/wiki/Methpipe</a>       | bisulfite sequence, FASTQ, SAM/BAM | Bisulfite mapping          | Sequence Analysis |
| 426 | MethylCoder | Pipeline for fast, simple processing of Bisulfite-treated reads into methylation data. Includes scripts for analysis and visualization. In addition to a binary output, the direct output of methylcoder is a text file that indicates per-nucleotide methylation context (CG/CHG/CHH) and methylation levels (both coverage and C-T conversions). Pipeline for fast, simple processing of Bisulfite-treated reads into methylation data. Includes scripts for analysis and visualization. In addition to a binary output, the direct output of methylcoder is a text file that indicates per-nucleotide methylation context (CG/CHG/CHH) and methylation levels (both coverage and C-T conversions). The direct output of methylcoder is a text file that looks like | Genomics, Sequencing, DNA methylation, Epigenomics                                                     | Mapping, Bisulfite mapping                       | <a href="http://seqanswers.com/wiki/MethylCoder">http://seqanswers.com/wiki/MethylCoder</a> | FASTQ, FASTA                       | binary, TXT, SAM           | Sequence Analysis |
| 427 | MetMap      | Produces corrected site-specific methylation states from MethylSeq experiments and annotates unmethylated islands across the genome.                                                                                                                                                                                                                                                                                                                                                                                                                                                                                                                                                                                                                                  | DNA methylation                                                                                        |                                                  | <a href="http://seqanswers.com/wiki/MetMap">http://seqanswers.com/wiki/MetMap</a>           | genome                             | DNA methylation            | Sequence Analysis |

|     |            |                                                                                                                                                                                                                                                                                                                                                                                                                           |                                                                                 |                                   |                                                                                           |                                                 |                                           |                   |
|-----|------------|---------------------------------------------------------------------------------------------------------------------------------------------------------------------------------------------------------------------------------------------------------------------------------------------------------------------------------------------------------------------------------------------------------------------------|---------------------------------------------------------------------------------|-----------------------------------|-------------------------------------------------------------------------------------------|-------------------------------------------------|-------------------------------------------|-------------------|
| 428 | PASH       | Pash 3.0 performs sequence comparison and read mapping and can be employed as a module within diverse configurable analysis pipelines, including ChIP-Seq and methylome mapping by whole-genome bisulfite sequencing                                                                                                                                                                                                      | Epigenomics, DNA methylation                                                    | Alignment, Bisulfite mapping      | <a href="http://seqanswers.com/wiki/PASH">http://seqanswers.com/wiki/PASH</a>             | Epigenomics, DNA methylation                    | Alignment, Bisulfite mapping              | Sequence Analysis |
| 429 | RMAP       | Assembles 20 - 64 bp Solexa reads to a FASTA reference genome. By Andrew D. Smith and Zhenyu Xuan at CSHL. (published in BMC Bioinformatics). POSIX OS required.                                                                                                                                                                                                                                                          | DNA methylation                                                                 | Mapping, Bisulfite mapping        | <a href="http://seqanswers.com/wiki/RMAP">http://seqanswers.com/wiki/RMAP</a>             | genome                                          | Mapping, Bisulfite mapping                | Sequence Analysis |
| 430 | Sherman    | bisulfite-treated Read FastQ Simulator                                                                                                                                                                                                                                                                                                                                                                                    | Genomics, Bisulfite Sequencing, DNA methylation                                 | Simulation                        | <a href="http://seqanswers.com/wiki/Sherman">http://seqanswers.com/wiki/Sherman</a>       | Genomics, Bisulfite Sequencing, DNA methylation | FASTQ, CSFASTA/CSQUAL (ABI SOLiD)         | Sequence Analysis |
| 431 | SOCS       | SOLiD reference based, un-gapped alignment with bisulfite capability                                                                                                                                                                                                                                                                                                                                                      | RNA-Seq Alignment, DNA methylation, SNP discovery                               | Mapping, Bisulfite mapping        | <a href="http://seqanswers.com/wiki/SOCS">http://seqanswers.com/wiki/SOCS</a>             | CSFASTA/CSQUAL (ABI SOLiD)                      | Delimited Text                            | Sequence Analysis |
| 432 | Mapsembler | Mapsembler is a targeted assembly software. It takes as input a set of NGS raw reads and a set of input sequences (starters). It first determines if each starter is read-coherent, e.g. whether reads confirm the presence of each starter in the original sequence. Then for each read-coherent starter, Mapsembler outputs its sequence neighborhood as a linear sequence or as a graph, depending on the user choice. | Metagenomics, Transcriptomics, DNA-Seq, RNA-Seq Quantitation, Targeted assembly | Assembly, micro assembly, Mapping | <a href="http://seqanswers.com/wiki/Mapsembler">http://seqanswers.com/wiki/Mapsembler</a> | FASTA                                           | FASTA, XGMML (Cytoscape), graphml (Gephi) | Sequence Analysis |

|     |                 |                                                                                                                                                                                                                                                                                                                   |                                                                                                                                                                                                                                                                                                                         |                                                                                                                         |                                                                                                     |                                              |                            |                   |
|-----|-----------------|-------------------------------------------------------------------------------------------------------------------------------------------------------------------------------------------------------------------------------------------------------------------------------------------------------------------|-------------------------------------------------------------------------------------------------------------------------------------------------------------------------------------------------------------------------------------------------------------------------------------------------------------------------|-------------------------------------------------------------------------------------------------------------------------|-----------------------------------------------------------------------------------------------------|----------------------------------------------|----------------------------|-------------------|
|     |                 |                                                                                                                                                                                                                                                                                                                   | Alignment,Comparative genomics,DNA-Seq,Exome and Whole genome variant detection,Genomic Assembly,Integrated solution,Mapping,Quality Control,Read alignment,Reference assembly,Resequencing,SNP Annotation,SNP discovery,Sequence analysis,Sequencing,Targeted assembly,Targeted resequencing,Whole Genome Resequencing |                                                                                                                         |                                                                                                     |                                              |                            |                   |
| 433 | Spiral Genetics | Spiral Genetics provides alignment to reference, variant detection, variant filtering and annotation for any sized next generation sequencing dataset. Using cloud computing, the Spiral Platform can produce results at ultra high speeds through a web browser interface. No computing infrastructure required. |                                                                                                                                                                                                                                                                                                                         | Alignment,Annotation,Assembly,Burrows-Wheeler,T-Map,Data compression,Genome Alignment,Hadoop,MapReduce,Mapping,Trimming | <a href="http://seqanswers.com/wiki/Spiral_Genetics">http://seqanswers.com/wiki/Spiral_Genetics</a> | Fastq,Fastq.gz,Fastq.bz,qseq,qseq.gz,qseq.bz | Tab-delimited file,VCF,SAM | Sequence Analysis |
| 434 | ZINBA           | Identifies genomic regions enriched in a variety of ChIP-seq and related next-generation sequencing experiments                                                                                                                                                                                                   | ChIP-Seq,DNA-Seq                                                                                                                                                                                                                                                                                                        |                                                                                                                         | <a href="http://seqanswers.com/wiki/ZINBA">http://seqanswers.com/wiki/ZINBA</a>                     | genomic, BED                                 | ChIP-Seq, sequencing       | Sequence Analysis |
| 435 | BS Seeker       | Mapping tool for bisulfite treated reads                                                                                                                                                                                                                                                                          | Epigenomics                                                                                                                                                                                                                                                                                                             | Bisulfite mapping                                                                                                       | <a href="http://seqanswers.com/wiki/BS_Seeker">http://seqanswers.com/wiki/BS_Seeker</a>             | Epigenomics                                  | Bisulfite mapping          | Sequence Analysis |



|     |                  |                                                                                                                                                                                                                                                                       |                                                          |                                                 |                                                                                                       |                                 |                          |                   |
|-----|------------------|-----------------------------------------------------------------------------------------------------------------------------------------------------------------------------------------------------------------------------------------------------------------------|----------------------------------------------------------|-------------------------------------------------|-------------------------------------------------------------------------------------------------------|---------------------------------|--------------------------|-------------------|
| 436 | BS-Seq           | The source code and data for the Shotgun Bisulphite Sequencing of the Arabidopsis Genome Reveals DNA Methylation Patterning Nature paper by Cokus et al. (Steve Jacobsen's lab at UCLA). POSIX.                                                                       | Epigenomics                                              | Bisulfite mapping                               | <a href="http://seqanswers.com/wiki/BS-Seq">http://seqanswers.com/wiki/BS-Seq</a>                     | genome, DNA methylation         | Bisulfite mapping        | Sequence Analysis |
| 437 | ChromHMM         | ChromHMM is software for learning and characterizing chromatin states.                                                                                                                                                                                                | Epigenomics                                              | Hidden Markov Model,Segmentation                | <a href="http://seqanswers.com/wiki/ChromHMM">http://seqanswers.com/wiki/ChromHMM</a>                 |                                 | chromatin states         | Sequence Analysis |
| 438 | Gimme Motifs     | GimmeMotifs is a de novo motif prediction pipeline, especially suited for ChIP-seq datasets. It incorporates several existing motif prediction algorithms in an ensemble method to predict motifs and clusters these motifs using the WIC similarity scoring metric.  | Transcription regulation,ChIP-Seq,Epigenomics            | Motif analysis                                  | <a href="http://seqanswers.com/wiki/GimmeMotifs">http://seqanswers.com/wiki/GimmeMotifs</a>           | BED,FASTA                       | PSSM,HTML                | Sequence Analysis |
| 439 | Hicup            | A mapping pipeline for HiC interaction data. Performs independent mapping on each end of the interaction pair and removes commonly found artefacts.                                                                                                                   | Epigenomics                                              | Mapping                                         | <a href="http://seqanswers.com/wiki/Hicup">http://seqanswers.com/wiki/Hicup</a>                       | FASTQ,(Compressed) FASTQ        | SAM/BAM                  | Sequence Analysis |
| 440 | NPS              | Identify nucleosome positions given histone-modification ChIP-seq or nucleosome sequencing at the nucleosome level.                                                                                                                                                   | Epigenomics,ChIP-Seq                                     |                                                 | <a href="http://seqanswers.com/wiki/NPS">http://seqanswers.com/wiki/NPS</a>                           | ChIP-seq, nucleosome sequencing | nucleosome positions     | Sequence Analysis |
| 441 | NucleR           | nucleR is a R/Bioconductor package for working with tiling arrays and next generation sequencing. It uses a novel approach in this field which comprises a deep profile cleaning using Fourier Transform and peak scoring for a quick and flexible nucleosome calling | ChIP-on-chip,ChIP-Seq,Nucleosome Positioning,Epigenomics | Annotation,Peak calling                         | <a href="http://seqanswers.com/wiki/NucleR">http://seqanswers.com/wiki/NucleR</a>                     | ShortRead,BioConductor          | WIG,BED,BioConductor     | Sequence Analysis |
| 442 | RSAT peak-motifs | A workflow combining a series of time- and memory-efficient motif analysis tools to extract motifs from full-size collections of peaks as generated by ChIP-seq, ChIP-chip or other ChIP-X technologies.                                                              | ChIP-Seq,regulatory genomics,epigenomics                 | motif discovery,motif scanning,motif comparison | <a href="http://seqanswers.com/wiki/RSAT_peak-motifs">http://seqanswers.com/wiki/RSAT_peak-motifs</a> | Fasta                           | HTML,text,graphics (png) | Sequence Analysis |

|     |           |                                                                                                                                                                                                                                                                                                                                                                                                                                                                                                                                                                                                                                                                                     |                                                                                  |                                                                              |                                                                                         |                                                                 |                          |                   |
|-----|-----------|-------------------------------------------------------------------------------------------------------------------------------------------------------------------------------------------------------------------------------------------------------------------------------------------------------------------------------------------------------------------------------------------------------------------------------------------------------------------------------------------------------------------------------------------------------------------------------------------------------------------------------------------------------------------------------------|----------------------------------------------------------------------------------|------------------------------------------------------------------------------|-----------------------------------------------------------------------------------------|-----------------------------------------------------------------|--------------------------|-------------------|
| 443 | SeqMonk   | A tool to visualise and analyse high throughput mapped sequence data. SeqMonk is designed to be an easy to use application for the analysis of large scale mapped sequence datasets. It allows you to visualise your mapped datasets against an annotated genome with very flexible visualisation options. In addition you can also quantitate your data in a number of different ways, and then filter these results to pull out regions of interest. Finally you can annotate regions of interest and export reports and figures for further analysis. SeqMonk can be used to analyse a wide range of data types, ChIP-Seq, Genome Resequencing, 3/4C, MeDIP, Bisulphite Seq etc. | Genomics, Epigenomics                                                            | Visualization, Assembly visualization, statistical testing, Alignment viewer | <a href="http://seqanswers.com/wiki/SeqMonk">http://seqanswers.com/wiki/SeqMonk</a>     | Eland, GFF, BED, Maq, Bowtie, SAM, BAM, Delimited Text, Bismark | PNG, SVG, Delimited Text | Sequence Analysis |
| 444 | SICER     | A clustering approach for identification of enriched domains from histone modification ChIP-Seq data.                                                                                                                                                                                                                                                                                                                                                                                                                                                                                                                                                                               | ChIP-Seq, Epigenomics                                                            | Filtering                                                                    | <a href="http://seqanswers.com/wiki/SICER">http://seqanswers.com/wiki/SICER</a>         | BED                                                             | WIG                      | Sequence Analysis |
| 445 | ExomeCopy | CNV detection from exome sequencing read depth                                                                                                                                                                                                                                                                                                                                                                                                                                                                                                                                                                                                                                      | Exome and Whole genome variant detection, Copy number estimation, Exome analysis | Hidden Markov Model                                                          | <a href="http://seqanswers.com/wiki/ExomeCopy">http://seqanswers.com/wiki/ExomeCopy</a> | BAM                                                             |                          | Sequence Analysis |
| 446 | RUBioSeq  | RUBioSeq has been developed to facilitate the primary and secondary analysis of resequencing projects by providing an integrated software suite of parallelized pipelines to detect exome variants (SNVs and CNVs) and to perform Bisulfite-seq analyses automatically. RUBioSeq's variant analysis results have been already validated and published.                                                                                                                                                                                                                                                                                                                              | Exome analysis, Copy number estimation, Bisulfite Sequencing                     | Somatic variant calling                                                      | <a href="http://seqanswers.com/wiki/RUBioSeq">http://seqanswers.com/wiki/RUBioSeq</a>   | FASTQ                                                           | VCF                      | Sequence Analysis |

|     |                   |                                                                                                                                                                                                                                                                                                                                                                                                                                                                                        |                                                                                     |                                                                                                                                      |                                                                                                         |                                       |                                     |                   |
|-----|-------------------|----------------------------------------------------------------------------------------------------------------------------------------------------------------------------------------------------------------------------------------------------------------------------------------------------------------------------------------------------------------------------------------------------------------------------------------------------------------------------------------|-------------------------------------------------------------------------------------|--------------------------------------------------------------------------------------------------------------------------------------|---------------------------------------------------------------------------------------------------------|---------------------------------------|-------------------------------------|-------------------|
| 447 | Breakpointer      | Breakpointer is a fast tool for locating sequence breakpoints from the alignment of single end reads (SE) produced by next generation sequencing (NGS). It adopts a heuristic method in searching for local mapping signatures created by insertion/deletions (indels) or more complex structural variants(SVs). With current NGS single-end sequencing data, the output regions by Breakpoint mainly contain the approximate breakpoints of indels and a limited number of large SVs. | Exome and Whole genome variant detection,InDel discovery                            | Statistical testing                                                                                                                  | <a href="http://seqanswers.com/wiki/Breakpointer">http://seqanswers.com/wiki/Breakpointer</a>           | BAM                                   | GFF,GFF3                            | Sequence Analysis |
| 448 | RTG Investigator  | Comprehensive analysis pipelines powered with unique mapping speed and sensitivity deliver deep genomic analysis in variant detection and metagenomic applications with Illumina, Ion Torrent, Complete Genomics and Roche 454 data sets.                                                                                                                                                                                                                                              | Exome and whole genome variant detection,metagenomics,SNP discovery,InDel discovery | Mapping,Alignment,translated nucleotide search,k-mer analysis,species frequency estimation,contaminant filtering,Read depth analysis | <a href="http://seqanswers.com/wiki/RTG_Investigator">http://seqanswers.com/wiki/RTG_Investigator</a>   | FASTA,FASTQ,SAM,BAM,Complete Genomics | SAM,BAM,BED,VCF                     | Sequence Analysis |
| 449 | Variation toolkit | A set of C++ tools for the interpretation of VCF data.                                                                                                                                                                                                                                                                                                                                                                                                                                 | Genomics,Exome and whole genome variant detection,SNP Annotation                    |                                                                                                                                      | <a href="http://seqanswers.com/wiki/Variation_toolkit">http://seqanswers.com/wiki/Variation_toolkit</a> | VCF,Delimited Text                    | VCF,Delimited Text,Postscript,FASTA | Sequence Analysis |
| 450 | PeakAnalyzer      | PeakAnalyzer is a set of applications for processing CHIP signal peaks.                                                                                                                                                                                                                                                                                                                                                                                                                | Functional Genomics                                                                 | CHIP-Seq analysis                                                                                                                    | <a href="http://seqanswers.com/wiki/PeakAnalyzer">http://seqanswers.com/wiki/PeakAnalyzer</a>           | CHIP signal                           | CHIP-Seq analysis                   | Sequence Analysis |

|     |             |                                                                                                                                                                                                                                                                                                                                                                                                                                                                                                               |                                                                       |                                                                 |                                                                                             |                        |         |                   |
|-----|-------------|---------------------------------------------------------------------------------------------------------------------------------------------------------------------------------------------------------------------------------------------------------------------------------------------------------------------------------------------------------------------------------------------------------------------------------------------------------------------------------------------------------------|-----------------------------------------------------------------------|-----------------------------------------------------------------|---------------------------------------------------------------------------------------------|------------------------|---------|-------------------|
| 451 | SeqSite     | SeqSite is an efficient and easy-to-use software tool implementing a novel method for identifying and pinpointing transcription factor binding sites. It first detects transcription factor binding regions by clustering tags and statistical hypothesis testing, and locates every binding site in detected binding regions by modeling the tag profiles. It can pinpoint closely spaced adjacent binding sites from ChIP-seq data. This software is coded in C/C++, and supports major computer platforms. | ChIP-Seq,Functional Genomics,Regulatory element annotation            | ChIP-Seq,Peak calling,Statistical Modelling,Statistical testing | <a href="http://seqanswers.com/wiki/SeqSite">http://seqanswers.com/wiki/SeqSite</a>         | BED                    | BED,Bar | Sequence Analysis |
| 452 | FusionMap   | Detects fusion events in both single- and paired-end datasets from either RNA-Seq or gDNA-Seq studies and characterize fusion junctions at base-pair resolution.                                                                                                                                                                                                                                                                                                                                              | Fusion genes,Fusion transcripts                                       | Split-read                                                      | <a href="http://seqanswers.com/wiki/FusionMap">http://seqanswers.com/wiki/FusionMap</a>     | FASTA,FASTQ            | SAM     | Sequence Analysis |
| 453 | FusionSeq   | Identifies fusion transcripts from paired end RNA-Seq data.                                                                                                                                                                                                                                                                                                                                                                                                                                                   | Fusion transcripts,RNA-Seq,Fusion genes,Fusion transcripts            | Alignment Analysis                                              | <a href="http://seqanswers.com/wiki/FusionSeq">http://seqanswers.com/wiki/FusionSeq</a>     | MRF                    | GFR,BP  | Sequence Analysis |
| 454 | Trans-ABYSS | Trans-ABYSS is a software package that is designed to analyze ABYSS-assembled whole-genome shotgun transcriptome data.                                                                                                                                                                                                                                                                                                                                                                                        | RNA-Seq,SNP discovery,Fusion genes,InDel discovery,Fusion transcripts |                                                                 | <a href="http://seqanswers.com/wiki/Trans-ABYSS">http://seqanswers.com/wiki/Trans-ABYSS</a> | FASTQ,ABYSS assemblies |         | Sequence Analysis |

|     |                |                                                                                                                                                                  |                                                               |                                                                                                                                 |                                                                                                   |                                                      |                       |                   |
|-----|----------------|------------------------------------------------------------------------------------------------------------------------------------------------------------------|---------------------------------------------------------------|---------------------------------------------------------------------------------------------------------------------------------|---------------------------------------------------------------------------------------------------|------------------------------------------------------|-----------------------|-------------------|
| 455 | ViralFusionSeq | Accurately discover viral integration events and fusion transcripts by the use of soft-clipping information, read-pair analysis, and targeted de novo assembly   | Genomics, Fusion genes, Fusion transcripts, Viral genomics    | Read Alignment, Read mapping, Read pre-processing, Split-read, de-novo assembly, targeted de novo assembly, Alignment, Assembly | <a href="http://seqanswers.com/wiki/ViralFusionSeq">http://seqanswers.com/wiki/ViralFusionSeq</a> | Single-end and Paired end, FASTQ, (Compressed) FASTQ | Custom, .fastq, FASTA | Sequence Analysis |
| 456 | Chimera Scan   | Identifies chimaeric transcripts in RNA-Seq data                                                                                                                 | Fusion transcripts                                            |                                                                                                                                 | <a href="http://seqanswers.com/wiki/ChimeraScan">http://seqanswers.com/wiki/ChimeraScan</a>       |                                                      |                       | Sequence Analysis |
| 457 | FusionHunter   | Identifies gene fusions in RNA-Seq data                                                                                                                          | RNA-Seq, Fusion transcripts                                   |                                                                                                                                 | <a href="http://seqanswers.com/wiki/FusionHunter">http://seqanswers.com/wiki/FusionHunter</a>     | FASTQ                                                |                       | Sequence Analysis |
| 458 | FusionMap      | Detects fusion events in both single- and paired-end datasets from either RNA-Seq or gDNA-Seq studies and characterize fusion junctions at base-pair resolution. | Fusion genes, Fusion transcripts                              | Split-read                                                                                                                      | <a href="http://seqanswers.com/wiki/FusionMap">http://seqanswers.com/wiki/FusionMap</a>           | FASTA, FASTQ                                         | SAM                   | Sequence Analysis |
| 459 | FusionSeq      | Identifies fusion transcripts from paired end RNA-Seq data.                                                                                                      | Fusion transcripts, RNA-Seq, Fusion genes, Fusion transcripts | Alignment Analysis                                                                                                              | <a href="http://seqanswers.com/wiki/FusionSeq">http://seqanswers.com/wiki/FusionSeq</a>           | MRF                                                  | GFR, BP               | Sequence Analysis |
| 460 | ShortFuse      | Method for using paired-end reads to find fusion transcripts without requiring unique mappings or additional single read sequencing                              | Fusion transcripts                                            |                                                                                                                                 | <a href="http://seqanswers.com/wiki/ShortFuse">http://seqanswers.com/wiki/ShortFuse</a>           |                                                      | Fusion transcripts    | Sequence Analysis |
| 461 | TopHat-Fusion  | Detection of fusion genes in RNA-Seq data                                                                                                                        | Fusion transcripts                                            |                                                                                                                                 | <a href="http://seqanswers.com/wiki/TopHat-Fusion">http://seqanswers.com/wiki/TopHat-Fusion</a>   | RNA-seq                                              | genes                 | Sequence Analysis |

|     |                            |                                                                                                                                                                |                                                                                   |                                                                                                                                 |                                                                                                                                   |                                                      |                                    |                   |
|-----|----------------------------|----------------------------------------------------------------------------------------------------------------------------------------------------------------|-----------------------------------------------------------------------------------|---------------------------------------------------------------------------------------------------------------------------------|-----------------------------------------------------------------------------------------------------------------------------------|------------------------------------------------------|------------------------------------|-------------------|
| 462 | ViralFusionSeq             | Accurately discover viral integration events and fusion transcripts by the use of soft-clipping information, read-pair analysis, and targeted de novo assembly | Genomics, Fusion genes, Fusion transcripts, Viral genomics                        | Read Alignment, Read mapping, Read pre-processing, Split-read, de-novo assembly, targeted de novo assembly, Alignment, Assembly | <a href="http://seqanswers.com/wiki/ViralFusionSeq">http://seqanswers.com/wiki/ViralFusionSeq</a>                                 | Single-end and Paired end, FASTQ, (Compressed) FASTQ | Custom, .fast, FASTA               | Sequence Analysis |
| 463 | CisGenome                  | An integrated tool for tiling array, ChIP-seq, genome and cis-regulatory element analysis                                                                      | ChIP-Seq, ChIP-on-chip, Motif analysis, Gene annotation retrieval, Motif analysis | Gibbs motif sample                                                                                                              | <a href="http://seqanswers.com/wiki/CisGenome">http://seqanswers.com/wiki/CisGenome</a>                                           |                                                      | ChIP-seq analysis, genome analysis | Sequence Analysis |
| 464 | Knime4Bio                  | custom nodes for the interpretation of Next Generation Sequencing data with KNIME.                                                                             | Genomics, Gene annotation retrieval, mutations and regulatory sites               |                                                                                                                                 | <a href="http://seqanswers.com/wiki/Knime4Bio">http://seqanswers.com/wiki/Knime4Bio</a>                                           | VCF, Delimited Text                                  | Various                            | Sequence Analysis |
| 465 | Adapter Removal (software) | Removes adaptor fragments from raw short read sequence data and outputs data to FASTA format.                                                                  | General bioinformatics (pipeline)                                                 | Adapter Removal                                                                                                                 | <a href="http://seqanswers.com/wiki/Adapter_Removal_%28software%29">http://seqanswers.com/wiki/Adapter_Removal_%28software%29</a> | FASTA, FASTQ                                         | FASTA                              | Sequence Analysis |

|     |                  |                                                                                                                                                                                                                                                                                                                                                                                         |                                               |                                                                                                                                 |                                                                                                       |                     |                                |                   |
|-----|------------------|-----------------------------------------------------------------------------------------------------------------------------------------------------------------------------------------------------------------------------------------------------------------------------------------------------------------------------------------------------------------------------------------|-----------------------------------------------|---------------------------------------------------------------------------------------------------------------------------------|-------------------------------------------------------------------------------------------------------|---------------------|--------------------------------|-------------------|
| 466 | Bcbio-nextgen    | Python scripts and modules for automated next gen sequencing analysis. These provide a fully automated pipeline for taking sequencing results from an Illumina sequencer, converting them to standard Fastq format, aligning to a reference genome, doing SNP calling, and producing a summary PDF of results.                                                                          | General bioinformatics (pipeline)             | QC,filtering,Trimming,Mapping,Peak calling,Motif detection,Differential expression,genomic region matching,Alignment,Genotyping | <a href="http://seqanswers.com/wiki/Bcbio-nextgen">http://seqanswers.com/wiki/Bcbio-nextgen</a>       | FASTQ               | FASTQ,SAM,BAM,BED,VCF,PDF      | Sequence Analysis |
| 467 | SiLoCo           | Compares sRNA expression levels in multiple samples by grouping sRNAs into loci based on genomic location                                                                                                                                                                                                                                                                               | General bioinformatics (pipeline)             | Expression profiling                                                                                                            | <a href="http://seqanswers.com/wiki/SiLoCo">http://seqanswers.com/wiki/SiLoCo</a>                     | FASTA,FASTQ         | CSV,Various image file formats | Sequence Analysis |
| 468 | Ta-si prediction | ta-siRNA (trans-acting short interfering RNA): prediction of phased ta-siRNAs in plant sRNA datasets.                                                                                                                                                                                                                                                                                   | General bioinformatics (pipeline)             | phase pattern prediction                                                                                                        | <a href="http://seqanswers.com/wiki/Ta-si_prediction">http://seqanswers.com/wiki/Ta-si_prediction</a> | FASTA,FASTQ         | csv,Various image file formats | Sequence Analysis |
| 469 | Tripal           | Tripal is a collection of open-source, freely-available Drupal modules that serves as a web interface for a GMOD Chado database. It is designed to allow anyone with genomic data to quickly create an online genomic database using community supported tools. Tripal is part of the open-source tool collection available through the Generic Model Organism Database (GMOD) project. | Genomics,Genetics                             | Visualization,Database interface                                                                                                | <a href="http://seqanswers.com/wiki/Tripal">http://seqanswers.com/wiki/Tripal</a>                     | FASTA,GFF3,Chado DB |                                | Sequence Analysis |
| 470 | ZORRO            | ZORRO is an hybrid sequencing technology assembler. It takes to sets of pre-assembled contigs and merge them into a more contiguous and consistent assembly. The main characteristic of Zorro is the treatment before and after assembly to avoid errors.                                                                                                                               | Genomic Assembly,Genomics                     | Assembly,Hybrid assembly                                                                                                        | <a href="http://seqanswers.com/wiki/ZORRO">http://seqanswers.com/wiki/ZORRO</a>                       | FASTA               | FASTA                          | Sequence Analysis |
| 471 | BAMseek          | BAMseek is a large file viewer for BAM and SAM alignment files.                                                                                                                                                                                                                                                                                                                         | Genomics,Transcriptomics                      | Alignment viewer                                                                                                                | <a href="http://seqanswers.com/wiki/BAMseek">http://seqanswers.com/wiki/BAMseek</a>                   | SAM,BAM,VCF         | alignment view                 | Sequence Analysis |
| 472 | BreakDancer      | BreakDancer is an application for detecting structural rearrangements and indels in short read sequencing data                                                                                                                                                                                                                                                                          | Genomics,Structural variation,Indel discovery |                                                                                                                                 | <a href="http://seqanswers.com/wiki/BreakDancer">http://seqanswers.com/wiki/BreakDancer</a>           | genomic structure   | structural rearrangements      | Sequence Analysis |

|     |              |                                                                                                                                                                                                                                                                                                                                                                     |                                                      |                                    |                                                                                               |                                                         |                            |                   |
|-----|--------------|---------------------------------------------------------------------------------------------------------------------------------------------------------------------------------------------------------------------------------------------------------------------------------------------------------------------------------------------------------------------|------------------------------------------------------|------------------------------------|-----------------------------------------------------------------------------------------------|---------------------------------------------------------|----------------------------|-------------------|
| 473 | CLEVER       | CLEVER is a tool to discover structural variations such as (larger) insertions and deletions in genomes from paired-end sequencing reads.                                                                                                                                                                                                                           | Genomics,Structural variation,Copy number estimation | structural variation discovery     | <a href="http://seqanswers.com/wiki/CLEVER">http://seqanswers.com/wiki/CLEVER</a>             | BAM                                                     | Tab separated              | Sequence Analysis |
| 474 | Cortex       | Cortex is an efficient and low-memory software framework for analysis of genomes using sequence data. Cortex allows de novo assembly of variants without having to do a consensus assembly first. Also allows comparison of genomes without using consensus, and alignment of sequence data to a de Bruijn graph                                                    | Genomics                                             | Assembly,Variant Calling           | <a href="http://seqanswers.com/wiki/Cortex">http://seqanswers.com/wiki/Cortex</a>             | FASTQ,FASTA                                             | FASTA-like,VCF             | Sequence Analysis |
| 475 | DeconSeq     | DeconSeq can be used to automatically detect and efficiently remove any type of sequence contamination from metagenomic datasets, including human or other host sequences. The tool uses a modified version of the BWA-SW aligner and can be applied to longer-read datasets (150+bp read length). DeconSeq is available as both standalone and web-based versions. | Metagenomics,Metatranscriptomics,Genomics            | Contaminant filtering              | <a href="http://seqanswers.com/wiki/DeconSeq">http://seqanswers.com/wiki/DeconSeq</a>         | FASTA,FASTQ,(Compressed)<br>FASTA,(Compressed)<br>FASTQ | FASTA,FASTQ                | Sequence Analysis |
| 476 | ERNE         | Extended Randomized Numerical alignEr for accurate alignment of NGS reads. It can map bisulfite-treated reads.                                                                                                                                                                                                                                                      | Genomics,Alignment,Bisulfite Sequencing              | Mapping,Bisulfite mapping          | <a href="http://seqanswers.com/wiki/ERNE">http://seqanswers.com/wiki/ERNE</a>                 | FASTQ,(Compressed)<br>FASTQ                             | SAM/BAM                    | Sequence Analysis |
| 477 | Est2assembly | Processes raw sequence data from Sanger or 454 sequencing into a hybrid de-novo assembly, annotates it and produces GMOD compatible output, including a SeqFeature database suitable for GBrowse.                                                                                                                                                                   | RNA-Seq Alignment,Genomics                           | RNA-Seq Alignment,Genomics         | <a href="http://seqanswers.com/wiki/Est2assembly">http://seqanswers.com/wiki/Est2assembly</a> | sequence data                                           | RNA-Seq Alignment,Genomics | Sequence Analysis |
| 478 | FastQ Screen | FastQ Screen provides a simple way to screen a library of short reads against a set of reference libraries. Its most common use is as part of a QC pipeline to confirm that a library comes from the expected source, and to help identify any sources of contamination.                                                                                            | Genomics,Transcriptomics                             | Mapping,Sequencing Quality Control | <a href="http://seqanswers.com/wiki/FastQ_Screen">http://seqanswers.com/wiki/FastQ_Screen</a> | FASTQ                                                   | Delimited Text,PNG         | Sequence Analysis |



|     |                                              |                                                                                                                                                                                                                                                                                                                                                                                                                                                                                                                                                                                                                                                                                                                                                                     |                                                              |                                                               |                                                                                                                                                                       |                                        |                                   |                   |
|-----|----------------------------------------------|---------------------------------------------------------------------------------------------------------------------------------------------------------------------------------------------------------------------------------------------------------------------------------------------------------------------------------------------------------------------------------------------------------------------------------------------------------------------------------------------------------------------------------------------------------------------------------------------------------------------------------------------------------------------------------------------------------------------------------------------------------------------|--------------------------------------------------------------|---------------------------------------------------------------|-----------------------------------------------------------------------------------------------------------------------------------------------------------------------|----------------------------------------|-----------------------------------|-------------------|
| 479 | FindPeaks 4.0 (Vancouver Short Read Package) | The Vancouver Short Read Analysis Package (VSRAP) contains the FindPeaks application for Chip-Seq and RNA-Seq analysis, as well as utilities for SNP finding, working with aligned sequence files and a nascent database for storing SNPs across multiple libraries.,This package includes a growing suite of open source tools for working with Aligned reads of a wide variety of formats. The original version began with the FindPeaks CHIP-Seq tool, but has since grown into a wide variety of tools covering features from CHIP-Seq to RNA-Seq analysis and SNP discovery.,Contributions are welcome and encouraged, and new developers are welcome to join the project.                                                                                     | Genomics,SNP discovery                                       | Peak calling,Database, Format conversion,Alignment Analysis   | <a href="http://seqanswers.com/wiki/FindPeaks_4.0_%28Vancouver_Short_Read_Package%29">http://seqanswers.com/wiki/FindPeaks_4.0_%28Vancouver_Short_Read_Package%29</a> | BED,Mac,SAM,Bowtie,Eland,FASTA,Mapview | ACE,BED,GFF,WIG,Peaks,Regions,PNG | Sequence Analysis |
| 480 | Flexbar                                      | flexible barcode and adapter processing for next-generation sequencing platforms                                                                                                                                                                                                                                                                                                                                                                                                                                                                                                                                                                                                                                                                                    | Next Generation Sequencing,Sequence Quality Control,Genomics | Read pre-processing,Sample Barcoding,Adapter Removal,Trimming | <a href="http://seqanswers.com/wiki/Flexbar">http://seqanswers.com/wiki/Flexbar</a>                                                                                   | Fasta/q,Csfasta/q                      | Fasta/q,Csfasta/q                 | Sequence Analysis |
| 481 | GenomicTools                                 | GenomicTools is a flexible computational platform for the analysis and manipulation of high-throughput sequencing data such as RNA-seq and ChIP-seq. A variety of mathematical operations between sets of genomic regions is implemented thereby enabling the prototyping of computational pipelines that can address a wide spectrum of tasks from preprocessing and quality control to meta-analyses. More specifically, the user can easily create average read profiles across transcriptional start sites or enhancer sites, quickly prototype customized peak discovery methods for ChIP-seq experiments, perform genome-wide statistical tests such as enrichment analyses, design controls via appropriate randomization schemes, among other applications. | Genomics,ChIP-Seq,RNA-Seq                                    | genomic overlaps,peak detection,profiles,heatmaps             | <a href="http://seqanswers.com/wiki/GenomicTools">http://seqanswers.com/wiki/GenomicTools</a>                                                                         | BED,SAM/BAM,GFF                        | BED,SAM,GFF                       | Sequence Analysis |
| 482 | Gk arrays                                    | Gk-arrays are a data structure to index the k-mers in a collection of reads.                                                                                                                                                                                                                                                                                                                                                                                                                                                                                                                                                                                                                                                                                        | Genomics,transcriptomics, Metagenomics                       | Assembly,Error correction,Mapping                             | <a href="http://seqanswers.com/wiki/Gk_arrays">http://seqanswers.com/wiki/Gk_arrays</a>                                                                               | FASTA,Fastq,Multi-FASTA                |                                   | Sequence Analysis |

|     |            |                                                                                                                                                                                                                                                                                                                                                                                                                                                                                                                                          |                                                                                                     |                                                                  |                                                                                           |                                            |                                            |                   |
|-----|------------|------------------------------------------------------------------------------------------------------------------------------------------------------------------------------------------------------------------------------------------------------------------------------------------------------------------------------------------------------------------------------------------------------------------------------------------------------------------------------------------------------------------------------------------|-----------------------------------------------------------------------------------------------------|------------------------------------------------------------------|-------------------------------------------------------------------------------------------|--------------------------------------------|--------------------------------------------|-------------------|
| 483 | GPS        | GPS is a high spatial resolution peak detection algorithm for ChIP-Seq data.                                                                                                                                                                                                                                                                                                                                                                                                                                                             | Genomics,ChIP-Seq,Transcription Factor Binding Site identification ,regulatory genomics epigenomics | Protein Binding Peak Detection                                   | <a href="http://seqanswers.com/wiki/GPS">http://seqanswers.com/wiki/GPS</a>               | BED,SAM/BAM,Bowtie,ELAND                   |                                            | Sequence Analysis |
| 484 | HeliSphere | Open-source LINUX software package intended for use in analyzing data produced by the HeliScope Single Molecule Sequencer.                                                                                                                                                                                                                                                                                                                                                                                                               | Genomics,Whole Genome Resequencing,RNA-Seq,SNP discovery                                            | Mapping                                                          | <a href="http://seqanswers.com/wiki/HeliSphere">http://seqanswers.com/wiki/HeliSphere</a> | SMS                                        | FASTA,FASTQ,SAM,BAM,BED,WIG                | Sequence Analysis |
| 485 | HiPipe     | HiPipe is to make NGS data analysis quick and easy with high performance pipelines and intuitive web GUI.                                                                                                                                                                                                                                                                                                                                                                                                                                | Genomics                                                                                            | Mapping,Variant detection,Analysis Pipeline                      | <a href="http://seqanswers.com/wiki/HiPipe">http://seqanswers.com/wiki/HiPipe</a>         | Fastq.gz                                   | VCF BAM                                    | Sequence Analysis |
| 486 | Illuminate | Analytics toolkit in Python for Illumina HiSeq and MiSeq metrics,Illuminate parses the metrics binaries that result from Illumina sequencer runs, and provides usable data in the form of python dictionaries and dataframes. Intended to emulate the output of Illumina SAV, illuminate allows you to print sequencing run metrics to the command line as well as work with the data programmatically.,For the latest up-to-date README and status of illuminate, along with how-tos and sample data, go to one of the following links. | Genomics                                                                                            | Sequencing Quality Control                                       | <a href="http://seqanswers.com/wiki/Illuminate">http://seqanswers.com/wiki/Illuminate</a> | .bin and .xml files from rundata directory | python data structures,some textual output | Sequence Analysis |
| 487 | Lab7       | Data workflow management platform to streamline NGS analyses<br>200px right                                                                                                                                                                                                                                                                                                                                                                                                                                                              | Genomics                                                                                            | Workflow,Pipeline Management,Sample Tracking,Protocol Management |                                                                                           |                                            |                                            | Sequence Analysis |

|     |           |                                                                                                                                                                                                                                         |                                                                                                                                                                                                                                                         |                                                                                                                                                                                   |                                                                                         |                                                                                                     |                                                                 |                   |
|-----|-----------|-----------------------------------------------------------------------------------------------------------------------------------------------------------------------------------------------------------------------------------------|---------------------------------------------------------------------------------------------------------------------------------------------------------------------------------------------------------------------------------------------------------|-----------------------------------------------------------------------------------------------------------------------------------------------------------------------------------|-----------------------------------------------------------------------------------------|-----------------------------------------------------------------------------------------------------|-----------------------------------------------------------------|-------------------|
| 488 | Lasergene | Lasergene is a comprehensive DNA and protein sequence analysis software suite comprised of seven applications which include functions ranging from sequence assembly and SNP detection, to automated virtual cloning and primer design. | Alignment, De novo sequencing, De novo assembly, Genomics, InDel discovery, Integrated solution, Mapping, Phylogenetics, Protein structure analysis, Read alignment, SNP discovery, Sequence analysis, Transcription Factor Binding Site identification | Alignment, Alignment Analysis, Annotation, Assembly, Chromatogram viewer, Colorspace, Sequence analysis, Integrated Solution, Mapping, PCR Primer Design, Paired End, Scaffolding | <a href="http://seqanswers.com/wiki/Lasergene">http://seqanswers.com/wiki/Lasergene</a> | DNA, protein sequence                                                                               | protein sequence analysis, DNA analysis                         | Sequence Analysis |
| 489 | UGENE     | UGENE is a free cross-platform genome analysis suite that combines popular bioinformatics tools within a single user friendly interface.                                                                                                | Phylogenetics, Genomics, Sequence analysis, Protein structure analysis                                                                                                                                                                                  | Sequence parsing, command line tool wrappers, Programming Library                                                                                                                 | <a href="http://seqanswers.com/wiki/UGENE">http://seqanswers.com/wiki/UGENE</a>         | FASTA, GenBank, EMBL, FASTQ, AB1, Stockholm, clustalw, fasta.gz, phylip, MSF, GFF, newick, ACE, SAM | FASTA, GenBank, Stockholm, clustalw, fasta.gz, newick, ACE, SAM | Sequence Analysis |

|     |           |                                                                                                                                                                                                                                                                                                                                                                                                                                                                                                     |                                                                                                                                                            |                                            |                                                                                         |                                                 |                         |                   |
|-----|-----------|-----------------------------------------------------------------------------------------------------------------------------------------------------------------------------------------------------------------------------------------------------------------------------------------------------------------------------------------------------------------------------------------------------------------------------------------------------------------------------------------------------|------------------------------------------------------------------------------------------------------------------------------------------------------------|--------------------------------------------|-----------------------------------------------------------------------------------------|-------------------------------------------------|-------------------------|-------------------|
| 490 | Novocraft | Novoalign is a program for mapping short reads from the Illumina/SOLiD sequencing platform(s) to a reference genome.,Novoalign is a fast and accurate short read alignment tool for mapping large amounts of sequencing reads to a reference genome. The software is used for mapping reads from the Illumina and SOLiD sequencing platforms.,NovoalignMPI is our cluster-aware solution that supports parallel execution of alignment jobs across a network of servers using the MPICH2 interface. | Genomics,Whole Genome Resequencing,RNA-Seq Alignment,ChIP-Seq,miRNA                                                                                        | Mapping                                    | <a href="http://seqanswers.com/wiki/Novocraft">http://seqanswers.com/wiki/Novocraft</a> | FASTA,FASTQ,fasta.gz,CSFASTA/CSQUAL (ABI SOLiD) | SAM,Delimited Text,TXT  | Sequence Analysis |
| 491 | SeqBuster | SeqBuster, a web-based bioinformatic tool offering a custom analysis of deep sequencing data at different levels, with special emphasis on the analysis of miRNA variants or isomiRs and the discovering of new small RNAs.                                                                                                                                                                                                                                                                         | Small RNA transcriptome,miRNA                                                                                                                              | Mapping,Annotation                         | <a href="http://seqanswers.com/wiki/SeqBuster">http://seqanswers.com/wiki/SeqBuster</a> | FASTA,Tab-delimited                             | Tab-delimited           | Sequence Analysis |
| 492 | SeqSolve  | Simple analysis of Next Generation Sequencing data.                                                                                                                                                                                                                                                                                                                                                                                                                                                 | RNA-Seq,ChIP-Seq,Transcriptomics,miRNA,ncRNAs,sRNA,Differential Expression,Alternative Splicing,New gene discovery,Differential Expression,Quality Control | SAMtools,Cufflinks,IGV,MACS,Tibco Spotfire | <a href="http://seqanswers.com/wiki/SeqSolve">http://seqanswers.com/wiki/SeqSolve</a>   | SAM,BAM,BED,GTF,GFF,TXT                         | JPG,PPT,PDF,BED,XLS,TXT | Sequence Analysis |
| 493 | Vicuna    | De novo assembly of viral populations                                                                                                                                                                                                                                                                                                                                                                                                                                                               | De novo assembly,viral genomics,Population Genomics                                                                                                        |                                            | <a href="http://seqanswers.com/wiki/Vicuna">http://seqanswers.com/wiki/Vicuna</a>       | FASTQ                                           | FASTA                   | Sequence Analysis |

|     |                |                                                                                                                                                                                                                                                                                                                                                                                                                                                                                           |                                                            |                                                                                                                                 |                                                                                                   |                                                                  |                      |                   |
|-----|----------------|-------------------------------------------------------------------------------------------------------------------------------------------------------------------------------------------------------------------------------------------------------------------------------------------------------------------------------------------------------------------------------------------------------------------------------------------------------------------------------------------|------------------------------------------------------------|---------------------------------------------------------------------------------------------------------------------------------|---------------------------------------------------------------------------------------------------|------------------------------------------------------------------|----------------------|-------------------|
| 494 | ViralFusionSeq | Accurately discover viral integration events and fusion transcripts by the use of soft-clipping information, read-pair analysis, and targeted de novo assembly                                                                                                                                                                                                                                                                                                                            | Genomics, Fusion genes, Fusion transcripts, Viral genomics | Read Alignment, Read mapping, Read pre-processing, Split-read, de-novo assembly, targeted de novo assembly, Alignment, Assembly | <a href="http://seqanswers.com/wiki/ViralFusionSeq">http://seqanswers.com/wiki/ViralFusionSeq</a> | Single-end and Paired end, FASTQ, (Compressed) FASTQ             | Custom, .fast, FASTA | Sequence Analysis |
| 495 | VirusSeq       | We developed a new algorithmic method, VirusSeq, for detecting known viruses and their integration sites in the human genome using next-generation sequencing data. We evaluated VirusSeq on RNA-Seq data of 256 TCGA human cancer samples. Using these data, we showed that VirusSeq accurately detects the known viruses and their integration sites with high sensitivity and specificity. VirusSeq can also perform this function using whole genome sequencing data of human tissue. | Viral genomics                                             | Mapping, Read mapping, Read Alignment                                                                                           | <a href="http://seqanswers.com/wiki/VirusSeq">http://seqanswers.com/wiki/VirusSeq</a>             | FASTQ                                                            | viral genomics       | Sequence Analysis |
| 496 | BFAST          | Blat-like Fast Accurate Search Tool.                                                                                                                                                                                                                                                                                                                                                                                                                                                      | Whole Genome Resequencing                                  | Mapping, Alignment, Genome Indexing, Colorspace                                                                                 | <a href="http://seqanswers.com/wiki/BFAST">http://seqanswers.com/wiki/BFAST</a>                   | FASTQ, QSEQ, CSFASTA/CSQUAL (ABI SOLiD), compressed/uncompressed | SAM, BAF             | Sequence Analysis |

|     |              |                                                                                                                                                                                                                                                     |                                                                                                                                              |                                       |                                                                                               |                                                                                              |                       |                   |
|-----|--------------|-----------------------------------------------------------------------------------------------------------------------------------------------------------------------------------------------------------------------------------------------------|----------------------------------------------------------------------------------------------------------------------------------------------|---------------------------------------|-----------------------------------------------------------------------------------------------|----------------------------------------------------------------------------------------------|-----------------------|-------------------|
| 497 | SeqMan Ngen  | Sequence assembly software using traditional, next-gen, and third-gen technologies. Subsequent analysis of the assembly, including SNP discovery, coverage evaluation and consensus annotation is provided through full integration with Lasergene. | Genomics,De-novo assembly,De novo transcriptome assembly,Whole Genome Resequencing,SNP discovery,Indel discovery,ChIP-Seq,RNA-Seq Alignment  | Mapping,Assembly,Alignment,Paired End | <a href="http://seqanswers.com/wiki/SeqMan_Ngen">http://seqanswers.com/wiki/SeqMan_Ngen</a>   | FASTA,FASTQ,Scarf,SFF,SQD,ACE,PHD,ABI,AB1,GFF,CSFASTA/CSQUAL (ABI SOLiD),SCF,TXT,GenBank,SEQ | BAM,SAM,SQD,ACE,FASTA | Sequence Analysis |
| 498 | TAPyR        | Efficient BWT-based read aligner supporting multiple sequencing platforms                                                                                                                                                                           | Whole Genome Resequencing                                                                                                                    | Read mapping                          | <a href="http://seqanswers.com/wiki/TAPyR">http://seqanswers.com/wiki/TAPyR</a>               | FASTQ,SFF                                                                                    | SAM,BAM               | Sequence Analysis |
| 499 | Ngs-pipeline | Complete solution for human re-sequencing projects                                                                                                                                                                                                  | Personal genomics,regulatory genomics epigenomics,SNP discovery,structural variation discovery,regulatory element annotation,Indel discovery | mapping                               | <a href="http://seqanswers.com/wiki/Ngs-pipeline">http://seqanswers.com/wiki/Ngs-pipeline</a> | BAM,(Compressed) FASTQ,FASTQ,CSFASTA/CSQUAL (ABI SOLiD)                                      | BAM,VCF               | Sequence Analysis |

|     |                             |                                                                                                                                                                                                                                                                                                                                                                                                                                                                                                               |                                                            |                                                                 |                                                                                                               |                                  |                                                                                                                  |                   |
|-----|-----------------------------|---------------------------------------------------------------------------------------------------------------------------------------------------------------------------------------------------------------------------------------------------------------------------------------------------------------------------------------------------------------------------------------------------------------------------------------------------------------------------------------------------------------|------------------------------------------------------------|-----------------------------------------------------------------|---------------------------------------------------------------------------------------------------------------|----------------------------------|------------------------------------------------------------------------------------------------------------------|-------------------|
| 500 | SeqSite                     | SeqSite is an efficient and easy-to-use software tool implementing a novel method for identifying and pinpointing transcription factor binding sites. It first detects transcription factor binding regions by clustering tags and statistical hypothesis testing, and locates every binding site in detected binding regions by modeling the tag profiles. It can pinpoint closely spaced adjacent binding sites from ChIP-seq data. This software is coded in C/C++, and supports major computer platforms. | ChIP-Seq,Functional Genomics,Regulatory element annotation | ChIP-Seq,Peak calling,Statistical Modelling,Statistical testing | <a href="http://seqanswers.com/wiki/SeqSite">http://seqanswers.com/wiki/SeqSite</a>                           | BED                              | BED,Bar                                                                                                          | Sequence Analysis |
| 501 | MG-RAST                     | MG-RAST is a fully-automated service for annotating metagenome samples.                                                                                                                                                                                                                                                                                                                                                                                                                                       | Metagenomics,Phylogenetics,Metabolic reconstruction        | Annotation                                                      | <a href="http://seqanswers.com/wiki/MG-RAST">http://seqanswers.com/wiki/MG-RAST</a>                           | metagenome                       | metagenome samples annotation                                                                                    | Sequence Analysis |
| 502 | EUADR - Literature analysis | The aim of the "Literature Analysis" workflow is to automate the search of publications related to ADRs corresponding to a given drug/adverse event association. To do so, we defined an approach based on the MeSH thesaurus, using the subheadings «chemically induced» and «adverse effects» with the "Pharmacological Action" knowledge.                                                                                                                                                                  |                                                            | literature analysis, ADR, adverse event, adverse effects        | <a href="http://www.myexperiment.org/workflows/2280.html">http://www.myexperiment.org/workflows/2280.html</a> | Event Code, ATC code of the drug | List of MedLine publications found formatted according the defined EU-ADR project format. List of adverse events |                   |
